# Supplementary material for: Characterization of the glutathione S‐transferase genes in the sand flies Phlebotomus papatasi and Lutzomyia longipalpis shows expansion of the novel glutathione S‐transferase xi (X) class
Source: PubMed Central journal article supplement (PMC9540044; doi:10.1111/imb.12769), 2022-03-08

**A.** A GSTD gene cluster on *L. longipalpis* scaffold JH689583

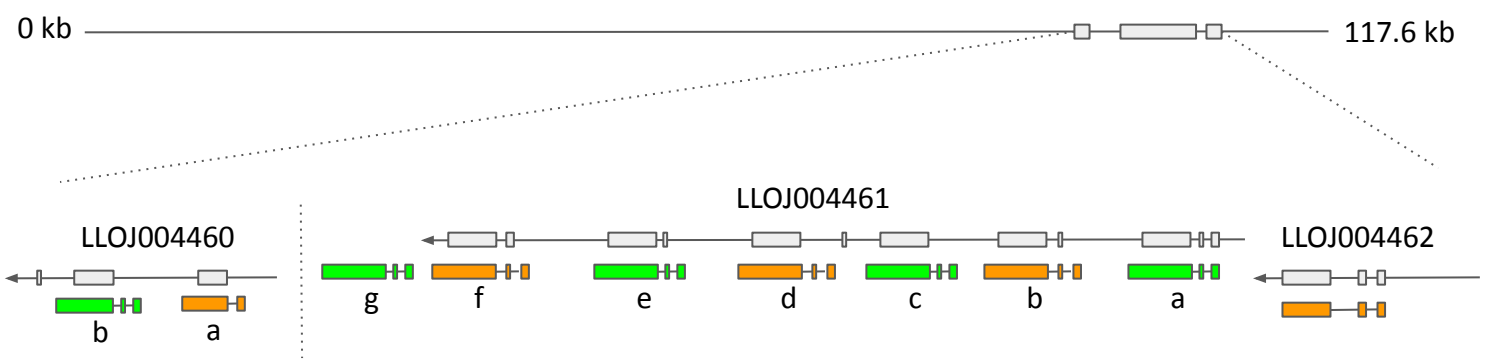

**B.** A GSTX gene cluster on *L. longipalpis* scaffold JH690728

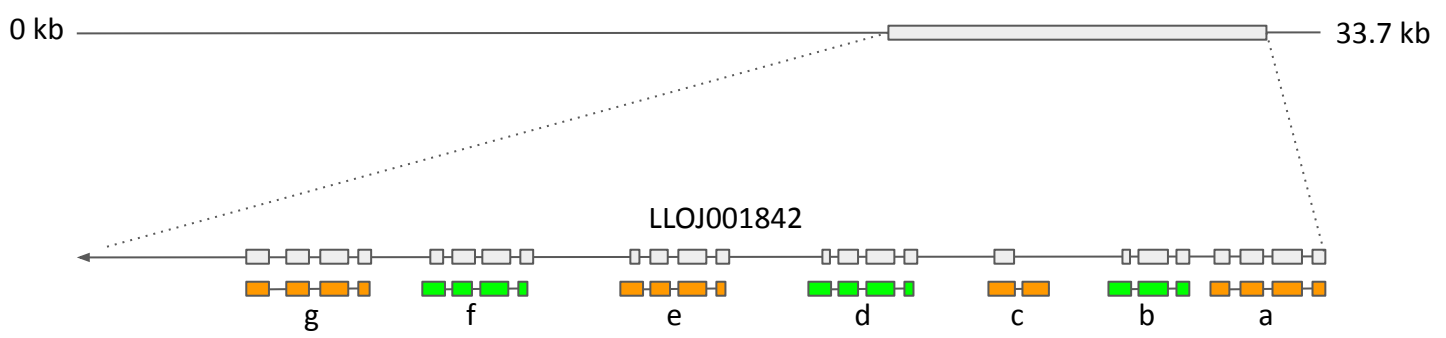

**C.** A GSTX gene cluster on *L. longipalpis* scaffold JH690204

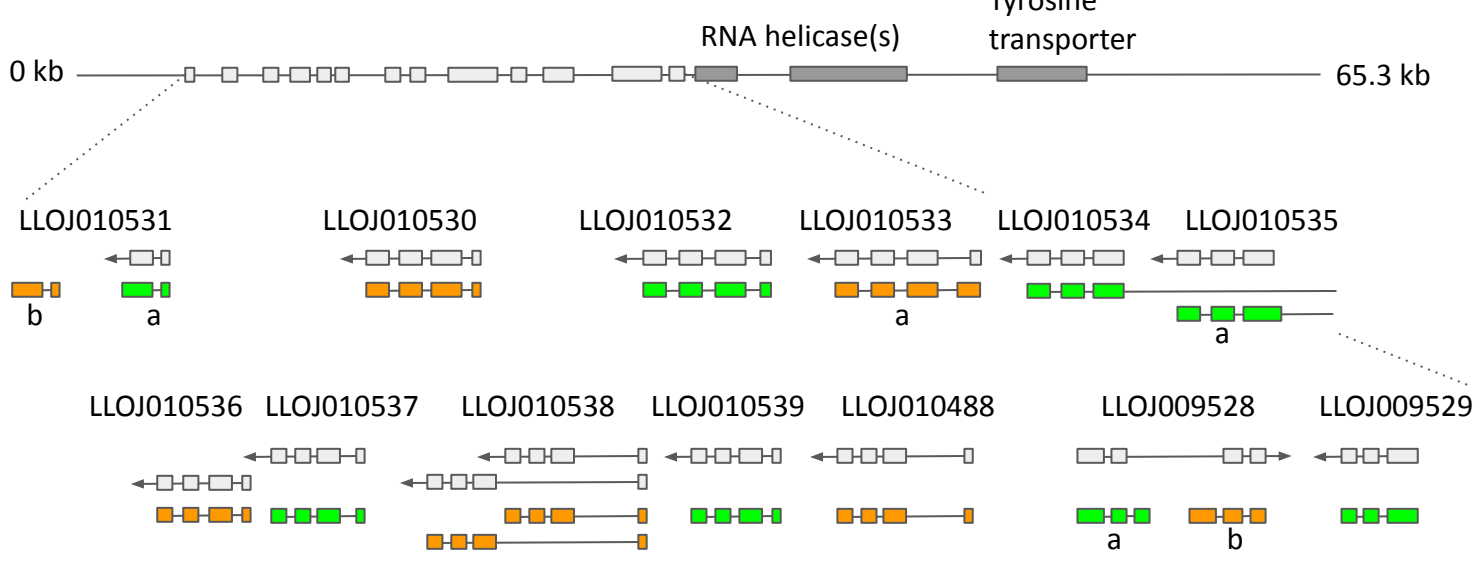

**D.** A GSTX gene cluster on *P. papatasi* scaffold JH660956

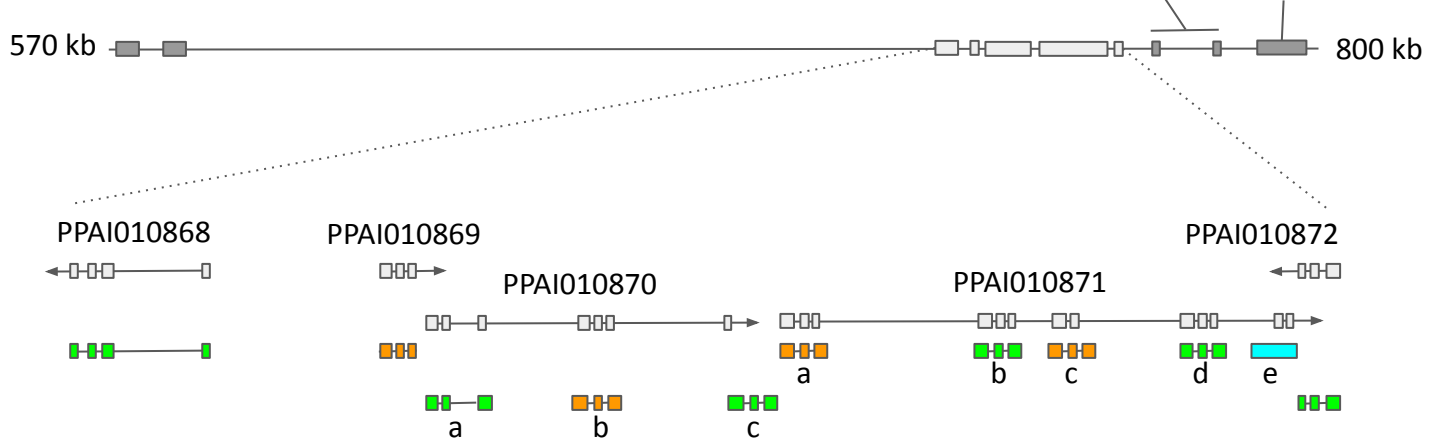

Supplement: IMB-31-417-s001.pdf [file IMB-31-417-s001.pdf]
