# Supplementary material for: Characterization of the glutathione S‐transferase genes in the sand flies Phlebotomus papatasi and Lutzomyia longipalpis shows expansion of the novel glutathione S‐transferase xi (X) class
Source: PubMed Central journal article supplement (PMC9540044; doi:10.1111/imb.12769), 2022-03-08
Supplement: IMB-31-417-s002.pdf [file IMB-31-417-s002.pdf]

# Appendix 1

## Manual editing of gene annotation  
## Previous coding exon annotation indicated by bold and underlined text (some in italic)  
## Manually edited exon annotation indicated by colour highlights  
## (for multiple genes, different colours indicate different genes)  
## Predicted protein(s) after editing are shown beneath each annotated genomic region

#####  
##### GST delta #####  
#####

##### PPAI001211 - GSTD #####

>JH662257.1 reverse | PPAI001211 (pre-editing) | PPAI001211 (post-editing)  
TTCATAACCTTTTATTGATGGGAAATCTTTTGGCCATTTATTTCAAACACGTGATTTGTCGCAAATTAGAGATCCATAGGAAATTCCTATACATGCTTTGTCTTG  
AGTTTTCTATATATATTTCGCTTTTATACTATAATAAATTGTATAATAGAAGAATTATGTAAACATATCCGATTCAGGGGTGTAAAATGCTCTGTGAACTTTT  
CTATTTGCCTGAGAGTCCACCTGTGCGACGGTTTGTCTATGTGGGCGACTCTGAAATGTTAATTTGACCTCAAAGTCGTAAATATCTCAATGGAGAGCAGCTTAAACCT  
GAATTCATACAAGTAAGTCCTTATATTTATAATAAATTCAAAGTACAGATAACTCAATTTTCTTAACAGTTAAATCCTCAGCACTGCATTCCAACCATGGAAGACAATG  
ATCTCGTCTTGGGAGAGCCGAGTAATCTAATGTATTTAGTGTGACCTTATGCAGAAGATGACACTTTGTACCCCAAAGATCTCCAAAACGAGCGATGGTTGATCAACG  
AATTCATTTTGACCTAGGGACTCTCTACCAAAGAGCAGGAGACTATTTTGTAAAATTTTAAATTTGTATACTCATAAAGAAAACAAAATAATTTTATTTTATTTTATTTTACA  
GTTTCTACACTTTTCTTTGGGCCCATTTGGATGAAACGAAAAAGCTCGCCTGGCTGAGGCATTAGGATGGCTTGAAGATATCTCAAAGGTCGTACTTGGGTAGCAACG  
GAAAACCTTACTATTGCGGATCTCATTCTTTGTGTACTATATCGCAAATGAGGCTTTTGGATTGAATTAGGACCTACCCAAAAGATAAGAGCCTGGTTCCAACCTGTGCA  
AAGAAAACTGGAGCCTTATGGATATGAAGAAATTAATGAAGCCGAGCAAACGCTCTTGCAGACCTTTTATAGATCTAAATTAATTTGATTGTTGTTGTGAATATAATTT  
TGAGCAAATACTTACTTTTCATCTACATACCTAATCACTCTAAATCCTTTTGCATGCAAGTTGTTATTTACGCTTAGATAATGGTTTGAACACACTTTTTGT  
TGCTCAAATATAGAATATCAATACTATTTAGATATGTAAAAATTCGAATATATTAGGGTTTTTATTG

>PPAI001211 (217 aa; 3 exons) | UNCHANGED

MPVKLFYLPESPCCRTVLLCGRLLNVNFDLKVNNILNQEQLKPEFIQLNPQHCIPTMEDNDLVWESRVILMYLVSAYAEDDLYPKDLQKRAMVDQRIHFDLGLTYQ  
RAGDYFPTLFFGAHLDETKARLAEALGWLEDILKGRTWVATENFTIADLILCVTISQIEAFGFELGPYPKIRAWFQLCKEKLEPYGYEEINEAGANALADLFRSKL  
N-

##### PPAI006595 - GSTD #####

>AJVK01058452.1 forward | PPAI006595 (pre-editing) | PPAI006595\_a (post-editing)  
ACACAATATATTAGCGGGATTTTCTATGGATGCCAGGCGGAAAAATAACAGAAAAATCCACGGATTTTCTTTTAAAGCGAAACTTTGTGGCCGATCGGCTAAAGG  
GACTGTAGATGGAAACGTCAAACCTTTGTCAAAAATGCAATTTTGTACGAAAATGCTTATATTGTGTAGAGGCCTTAAAGCTGCTATTCAAATGAAAAATGAACATA  
TTTTTTTTAGTATCTTATTATCTTAAGTGTCTGCTTATCGACTTTCTATGCATTGGTTCCTGTCTCGACTGTTTTTCTAAGTCTTCGCAGTGTCTAAAACCCAG  
CGAACAGTCGTGACAGGAACCAACACAAAGAAAAGTCGATAATACAGAAGCACTCGAGGACAGTCGTGTCAAAAAAATTAATCTCTTTTCTGTTTTGTTTAGGAAAT  
AAAAAACCGCTCTAAAAATCCTAATTTAATCAAAATCTTAAATTTTCTTCTAATAGGTTAATTTATCAGCATTGTGTGCCAATCTCGTGACCAATGGCTTTTCTCT  
TGGGAATCCCGTGCCATTTGGCGTATCTCGTGGAGAAGTACGGAAGGATGATGCCCTGTACCCCAAAGGATCCCGAGAACAGAGCTCGAGTGAACCAATGCTCTACTTCG  
ACATGGGAACCTCTATCAGCGTTTTGCTGACTACTATTACCAGCAATCTTCGCCAAGGCTCTTTAGTCTGTGATGATTCAAGAAGATGGAAGATGCCGTTGGTTTTCT  
CAATACCGGGCTCGAAGGACGAAAATTCGCTCGCCGAGATACTCTTACCATCGCCGATATGGCTCTTTAGCCACAGTTGCCACCTACGATGCTTTAATTCGACTTCTCC  
AAGTATCCCAACGTCACAGATGGTACGAGAGCTGCAAAAAGACATTTCTGGCTACGATGAGATCAACCAAAAGGGAGCTGATGAGTTCTTCGCGAAATTCGGTCTGTC  
TCACCAATAATGCAGAGAGAACCTTCCGGGAGCCTTTTCTCCTCAACAACAATCCCATGCTAGCTAGTACTTAGGCAACTTTAGAGACGTGAGACCTCAGACAAAT  
CACCAGATTGTAATAATAAATACCTAGAAAAATCCTAAAACAATGTGTAATACTGTATAAATGATCTGAAGAGTTTTATAAAAAAAGATTTTATGAATGAA

>PPAI006595\_a (224 aa; 3 exons) | EDITED TO ADD 2 EXONS

MKNEHIFFSILLFLSVSALSTFYALVPVSTVFLSLRSLKPPNKKSIIQKHSRTVVNYQHCVPVTLVNDGFLWSERAILAYLVEKYGKDDALYKDPENRVRVQMLY  
FDMGTLYQRFAYEYYPAPFAKAPSPDGFKMKMEDAVGFLNTGLEGRKFAAGDTLTIADMLVATVATYDVFKDFSKYPNVTRWYESCKKTIISGYDEINQKGADEFFA  
KFGAVLNQ-

##### LLOJ007285 - GSTD #####

>JH689876 reverse | LLOJ007285 (pre-editing) | LLOJ007285 (post-editing)  
TCTTTTGCATTTTTTTCGAGAGGCGTGGAGGTAACAACACCGTGCACAACCTTAGTGAAATAAATAAAGGGTGCATAGAAATCCCATGCGCTGAGTTATGTT  
TTTTTCTCCTTTATCGCTTGTACTTCTTTTTGCTTGTGTTATGAGAGGGGAAATACCTTTGCAAAAATATCTTTAAGGGGCATCAAATGCCCAGTAAAGCTGTA  
CTACTTGCCTGAAAGTCCACCTGTAGGACAATTTACTCTTGGGAGACTCCTGAAAATGATTTTGTATCTCAAAATGTCAATATACTCGATGGGGATCAACTTAAACCG  
GATTTTGTGCAGTAAGGCTCAAATGAATTATTTAAACCTTCAAATTTAATTAATAAATCCTGGCAGTTGAATCCGCAACACTGCATCCCTACAATGGATGACAAAT  
GATCTGTTCTGTGGGAGAGCCGCTAATCTTATGTATTTGGTGTGACGCTATGCTGAGGATGATATCTGTACCCAAAGGACATCTACAGAGAGCAATGGTGGATCAAC  
GAATCCATTTGATTTGGGTACTCTTACCAAAGAGCTTCTGATTATTTTGTAAAGATTCTTTACTATAAAAACGAAATATCTTAAATAATCCAAGGAATGAAAGG  
TAAATTTTACCATTTGTAGTTTCCCACTATTTTGTGGAGCACATTTAGATGAAACTAAAAAGCTCGCTAGCTGAGGCCCTAGGATGGTTCCGATGACATCTTAAAG  
GACGCAATGGTGGCAACGGACAATTTACAATCGCCGATCTCACTCTGTGCTCACTGTGTCACAAATTAAGACATTTGGATTTGAATTGGTCCATATGGTCTGTCAG  
GGCATGTTTCAGCACTGCAAAAGATGAACTTGAAGCCATGGATACGATGAGATCAATCAGTGGGAGCAGATGCCCTCGGAGAAATGTTTCCGTCGAAATTCGCAACAAG

AAATAA TTTTTTCTTTAAACTGTGAACGATTAATAAAAAGTTATAAAAAATGCCTGTTAAATGAATTTTTGTATGCCTTAGATGTCGCTACAACATTATTCGGCCCT  
CTGGTGGAAAAATCCCGTTTCGCGTTTAAATAGAATTTATTACTTTCTTCGACAATAAATCCACATTCAAACACGAGAATGTAATATTAGTTAC

> LLOJ007285 (220 aa; 3 exons) | UNCHANGED

MPVKLYLPEPSPCRTILLGRLLKIDFDLKIIVNILDGDQLKPDFVQLNPQHCPMTDDNDLVLWESRVILMYLVSAYAEDDILYPKDILQRAMVDQRHFDLGLTYQ  
RASDYFPTFLVGAHLDETKKARLAEALGWFDLILKGRKWATDNFTIADLLCIVTVSQIEAFGFELGPYGRVRAWFQHKDELEPHGYDEINQVGADALGEMFRSKL  
QQEK-

##### LLOJ004462, LLOJ004461, LLOJ004460 (LLOJ004462 and LLOJ004460 in italics) - GSTD #####

>JH689583 reverse | LLOJ004462, LLOJ004461, LLOJ004460 (pre-editing) | LLOJ004462, LLOJ004461 a,  
LLOJ004461 b, LLOJ004461 c, LLOJ004461 d, LLOJ004461 e, LLOJ004461 f, LLOJ004461 g, LLOJ004460 a,  
LLOJ004460 b (post-editing)

CATTTCTAAAATCAATTAATTTTCAATAAATTCATGAATGTGATCTTAATTTTATTTCTCAACTGTGTAATGCTTCATTAATGTTTGAGCACCTAAAACAAGAA  
ATCAAACACCTTAATGATTATTCTTCAATTTGTAGGCACATTGAATCAACTTTGGAAGTCTAAATATTTGATCAACTCATCAATCTAAAC ATGGATTTGACTACTCT  
TCGGGATCTGCCCTTCGCGCAGCGTCTCTCTGTGTGAAAAGCTCTTGGCCTTGATTCAATCTCAAACCTCTCG TAGGTTTTATCAGACTTATTAGCCCTTTAATTT  
TTTTGACCTTTACTGATTCTTTTCATGGTTTACTCACTCGTCAAAAAATTAGACATTTTATCTAATAATAAATCGTTATTATATAAATATAG ATTTAATGGCTGGAG  
AGCACTTGAACCGGAATTCCTAAAG GTAAGTGAATAGAGTACAATGACCTACATTTTCGTCATGCCACCAACGAAAACGTGATGGGCTATCATTTCCTAAAGGTT  
TCAATCCGTAATTTGAATCAACGCCAATGATATGACTTGACAGAAATTTGGTATAGATAAGATTAGAATTGAGTTTCATAATTAGACGGATTGTCCGTTCTTAT  
CTAGCAGCTTGAATTTCTCTTTGAAAGAAATGAAAGTAATTGCGTGATATCATGAAGTCCACGCATTCATTCATTTTATTACACTGGGTAACATTTTATTCTT  
TTCTCTCCGATTAG ATCAACTACCAACTGCATACCTACTCTTGTGGATAATGGCTTTGCACGTGGGAATCTCGTGTATCTTCGCCCTATTTGGTGGAGAAATACGGA  
AAGGATGATTCCGTGTACCCGAAGGATCCCGAGAAGATATTTGTGAATCAGAACTCTACTTCGACATGGGAACACTCTACAGCGCTTTGCGGATTACTACTATCTCG  
TCTTTTTCGAAAGGCTCCATCAATCCAGAGGCATACAAAAGATGGAAGAGGCTGTTGGTTCCTCAATACGGCTCTCGAGGGAAAACTTATGCTCTGGAGATAATCT  
TACTATTGCTGATCTTTCGCTGGTTCGCTACCAATTTCAACCTATGATGGCTTCAAAATTTGATTTCTCGAAGTATCCCAATGTGGCTAAATGGTATGAGACGTGCAAGAAGATT  
CCAGGCTATGAGGTGAATCAAAAGGGTGTGATGAGTTTGTGGAGAAATTTGGACCCTGCTTCCCAAGTAA ATGTGGTTCAAGGAAAAAATTTTAAATTTTCTTTG  
CATGCAATTTTCATAAAATATATTTACTAAAAAAATGTTCACTTCAGAGAAGAACTATTAATTTGTTTCAGTATAAACTGCATTTTCTAATACATATAAAAAAAT  
ACATTTTGGAAATTTAAATGAGTTTCTTATTTGATGATGCAAAAGGATCGGGAATGAAAGAATTTGATGTAACGAAATTTCTGTTAAGCTTCGCTCTTTTA  
AAGAAAAATGAGTTACAAATTTTATACGCCAAGTACAGATGATGATTAATCTATAAAAAATCTTGCAGATCATCATCGTGAACACAACATTTTCAGACAAC  
GTATAAATAGAAAGAGGACGACAAATTTTGTACATATTTTGTGTGTTTCTGCTGGAACGACGACCTGAAATTTTGTGATTTTGTGATTTTGTGATTTTGTG  
GAAATCACTGCAGCAGCTCAAATTTGAACATTAATAATAGTTTCAAACCTGAAAAGCTTTAAATAATCATGTTCTTGTGAAAGAAAATGAAAATATATGTGATTAC  
GAATTTTCTCAGTTGTGAGCAACCCACCAAGTATCAACTTCAATCTAATTTTCCACGAAGAGGCTTTTAAACATTTAGTCAAG ATGACTATTGATTTTACTAT  
TCGCGCTCTCTGCACCCTGTCCGAGCATCTTCTTCTGCCAAAACCTTGAATTTGAATTTAAATCTCAAGCCAATGG GTAAGATAAATGGAAGCTTTAGTTATTTG  
AATTAATGCAGAGAGAAAACATCTTGCTTCTTAATTTCTTGTAG ACTTGATGGCTGGTGTGACTGACCCAGAAATTTATAAAG GTAATGTAAGATCTGCGGAACG  
ATGACTTGTTTTAAATAGCAGTAGAAAAATTAATGAATGCTCTAATCTCATTGTCAG CTAAACTATCAGCATACAATTTCAACTCTCGTGGCAATGGTTTTCATTT  
TGGGAATCAGCTGCCATCTCGCTTATTTGGCGGAAAAGTACGGAAGAAATGACTCGCTCTATCCGAAGGATCTGAGAGAAAAGCCCGGTGAACCAAAGCTCTACTTCG  
ATATGGGGTGTCTTACCAACGCTTTGGTACTACTACTACAACCAATCCAAACAAAGACTCCGATGATCTGCTGCTTACAAGAAAATGGAAGAGGCTGTCCGTTTCT  
CAATACAGGCTTCGAGGGCCAAAAGTATATTGTTGGTGACACTGACCGTTGCAGATTTCCGAATCATGCAACGATCTCAACTACGATGTTCTCAAATTTGATTTTACA  
CCTACCCCAATGTTGTTCAATGGTATGAGAGGTGCAAGAAGACCATGCCAGGATATGAGATTAATCAAAAAGTGCAGATGAGTTCTTGTGAGAAAATCGGTCCTATGCTA  
CCAAAATAA GTTGAATTTTAAATGTTTGGTATTTCAATGAAAACATAAAAAATGTTCACTCAAAAAATATCTTTTAAATACATGCATTCGAAAACATTAATTTATG  
GATTTTATCTTTTCTGTGTGTGTAAGTTTGTGTTAACTATATAAAATAAAGCTTTATTCAGAAATTTGGAGTAAAAATCTCACCACACAGCAGCTCTTCTGCATGATTC  
TTCTTACCTTGAGATTGGGTTAGCAATTTTAGGCAGCACCTGTTGAGATTGATATCACTGCTACTCATACAATATCTAACTTTGTATCTACCAAATCATCATCGTCT  
GACCTACGAAAAGCGGACCATATAAGTAGAGGAGTGTCCATAAAATGTCAGTCACAGATTTCTGTTTATTTGTGAGACATCTCATAGACTTTTGAAGTGTTTTTCG  
GGTAAGTAAAGCGTGAGAAATGACAGATTGACCAATAAGTTGACAGCTTTTCTTATCTATAAAAAGATCGAAGATTAATGCGATTTTAAACGAAATAAAAA  
AAAATTTCTTCTGTGTGTCATGATTTCAAATTAATGTTCAACCGTGATTAATCATTACAGAAGTCTCATAAATTTTGTGGGATCAAAATCTCAATCTTCTCT  
CTTTTACAGCTTTGGTGAAGAGAGCATAAAGTGAACAATACACAATCAA ATGACTCTTGTATTTTACTATTCTCCACTTCTGCGCCATCCGGAGCATTCTTT  
CTTCTTTGCAAACTCTTGAATTTGAATTTAAACCTCAAGGAAATAG GTAATGAAAATGCAACACTTATTTCTTCTTTTAAATAAAAAAATGCTGAAATTTAATTT  
TTTACAG CATTTTGGGTGGTGTGACCTGAAAACCGGAATCTTTAAAG GTAATAAAATGCAAAATCTCAAAAAATCAATGTTACAACTTTTTTTATGAATGAATTT  
AAGTCTATACGTAATAAGATTTTCTAAATAAATATGTTCTTTTACTCCAG ATCAACTACCAGCACACTATTCTTACGCTAGTGGACAATGGTTTACAATGTGGGA  
ATCAGCTTCTATTCTTGCTTATTAGTGGAGAAATACGGAAGGATGATTCGCTGTACCCAAGTATCTCAGAAAGAGGCTCTGTGTAATCAGAAGCTCTACTTCGATATG  
GGAGTACTCTATCAGCGCTTTGCTGACTACTACTACAACCAATCCAAACGAAGACTCCCTTGATCTGCTGCTTACAAGAAGATAGAAGAGGGCCTTGGTTTCTCAATA  
CGGCTTGGAGGGCCAAAAGTTTGGTGTGTAAGATTTCCCTGACTATTGCAGACTTTGCTCTAATTACCCTATCTCAACTACGATGGCCTTAAATTTAATTTAAGCCTTA  
TCGGAATGTGGTCAATGGTATGAGCGGTGCAAGAAGACCATGCCAGGATATGATCTTAATGTGAAAGGCTAGAGCAGTTCTTGTGAGAAAATGGTCTATGCTACCAA  
AATTTCCATGA AAAATATAAAAAATTTTCAATTAATAAATTTCTTTTAAATACATGCATTCGAAAACAATAAATATGAAATTTATTTTCTTTCTGTGTGTCAG  
ATTAAGAAAAGAAAATAAATAAATAAAGCTTTATTCAGAAATTTGGATTAATAATCATCACAACAGCAGCTCTTCTGCATGATTTCTTCTTACCTTGAGATTGGGTTA  
GCAATTTAGGCAGCACCTGTTGAGATTGATATCAGTGCTACTCATACAATAATCTACCAAATCATGATCGTCAAACACACGAAATTTAGGCCATATAAGTAGAGGA  
GTGTCCATAAGATTGTGATCAGATTTGTGTTTTATTTGTGAGACATCTCATAGACTTTTGAAGTATTTTCGGGTAAGTAAAGACGTGAGAGAAATGACAGATTGA  
CCAAATAAGGTTTGAAGCTTTTCTTATTGCAAAGAAATCGAAGATTAGATACAGTTTAAACAAAATAAATGATTTGTGGGATTAATCAATTACAGAAGTTCTTT  
TTGTAATGATCCACTCTAATTTCTGTTTACAGAGCTTTAGTTGAAGGAGCATAAAGTGAACCACTCAAC ATGACTCTTGAATTTTACTATTCTCCACTATCT  
GCGCCATGTCCGAGCATTCTCTCTTTCGAAATCTGGAATTTAAACCTGAAAGAAATAG GTAAGAAAACACTTTTCGCTTTACAATTAATGAATGAA  
TAAATTCGTGTTTCTTCTCAAG ATGTTTGGGTGGCGAGCACTTGAACCGGAATTTTAAAA GTAAGTAAATAAATTTTCAATCAGAAATGCTGCTTATTC  
TCATGGACAGATAGCAAAAAAATATCTATGTTAGTGTCTTTAAATGTAATGAAATTTAAATGTTTTCTTTTACTCCAG ATCAACTACCAGCACCACTCTTACG  
CTGGTGGACAATGGCTTTGCAATGTTGGAATCACCTGCTATCTTCGCCATTTGGTGGAGAAAATACGGAAGGATGACTTCGCTGTACCCGAAGGATCCCAAAAAGAGATAT  
TTGTAATCAAAAAGCTGTACTTTGATATGGGAACACTATCAGCGCTTTGGGATTACCACTATCCAGTGA TTTTAAAGAAAACCTCATCATACGATCCGGAAGCATTTAA  
GAGGATGGAACAGGGTGTGAAATTTCTCAATACAGCCCTCGAGGGGAAGACCTACGTTGTTGGAGATAATCTTACTATTGCTGATCTTGGCTGGTGTCTACTATTCAACA  
TACGATGGCCTCAAATTTGACTTCTCGAAGTATCCCAATGTGGCTAAATGGTATGAGACGTGCAAGAAGATGCCAGGCTATGAAGTCAACCAGAAGGGTGTGGATAAATTC  
GTGAAATAATGGAATCGAAGAAATAA TATTTTCTGTGTAATGATTTAAATTTTACACATCTTTTCTCAATTAATCTTGTCTTTTGAAGTAAATCTTGTAT  
CAATTCATAAGAGAAAATTTAGCGTATATGTTCAAACATTTTCTTCTGATTTCTTGAATCTTGATATAAAATCAATCTGTTGACATGGATTTAATTAATAA





MTIDLYYSPASSPCRSILLGKTLGIHFNLIETLCR<sup>R</sup>GD<sup>N</sup>FK<sup>P</sup>EF<sup>S</sup>R<sup>R</sup>INYEHSIPTLVDNGFALWESRAILY<sup>L</sup>LADKYGKEDTLYPKNAQRKAI<sup>V</sup>NQRLYFDMGTLFQ  
RLADCYLKPVIEKKPVDPQDLWKMEEAVGFLNIALAGHKYAAGDTMTIADFALVATISTYEGLKFDLXXXXXXXXXXXXXXXXXXXXXXXXXXXXXXXXXXXX



**AATGAAGGAAATGTCTGAGTTCGAGAAGAACCCACCAGATCTCAGCCGCATGGTCCATCCCATTTCATCCAATCGGAAAGAAATTGAG**GGATTCAAGGGGTTTTCAAATAAAA  
TACTCTGTGTCATTTTTGATGTATCTTTCTTGCAAAGAAACTGTTGCACAACATTTACTTCTTGTCTTGTCTTAATTTGTTTTAAGCACATTAGCATCCAT  
GAATTACACCCTAATGATTCCCATAGGTTTTTAGTCTCACATCTATCCACAAACTTCGCGCCCAT

> **PFIAI009870** (229 aa; 2 exons) | **UNCHANGED**

MKLYGVDGPPSLAVRMALKALDIPFELVNVDCYAGEHLTEKYAEINPQKEIPVLDDDGFFLSEIAILQYLCDKYRPSQLYPKDPKARAIVNHRLNFNSAFYSSI  
SMYVMAPIFFDYRTPIGLKKLNSLVEFETYMKRSGTKYAAADYLTIA DFPLVTATLCLBAINFSLDEYPLVKAWYANFKKEYPDLWAIGEGGMKEIAEFKNPPDL  
SRMVHPHMPRKN-

##### LLOJ002711 - GSTI #####

> JH689493 reverse | **LLOJ002711** (pre-editing) | **LLOJ002711\_a**, **LLOJ002711\_b**, **LLOJ002711\_c** (post-editing)

ACTAAAAGCCCAATTAACCTTTAGAACAAAACAAGAAAATCTTTACGACTAATTTAATTTTTCCTCACTATTCTCATGAAGAGACCATAAAAACACTT  
TATTTTTAAAATAATTTTTAAACGAATTCATTTTTTAAATACATTGTCTGTTTTTTTTAAAGAAAATATATTTTTATTTGAATGCAGAACAA**ATGAAGCTGTACGCTGT  
GTCTGATGGACCCCCTCATTGGCCGTCGGAATGGCCCTAAAAGCTTTGGACATTCCGTATGAGCACATCAACGCTGGATTATTGTCTTCAGAGCACATGACGGAGAAGTAC  
GCCGAGATGAATCCGCAGAAGGAGATCCCCGTTCTCGATGACGACGGATTCTTCCTTCCCAGAACGATTCGCATTCTGCAGTATCTTTGCGATAAAATCCGCCCGGATTCTC  
AGCTCTACCCAAAAGAGCCAAAAGCTCGCGCCATTGCAATCATCGTCTCAATTTTAATCTTCCTTCTACTACAGCAGCATTTCTATGTATGTG**GTGAGTATTTCAATTT  
ATTTTTCTTTTGTTATTTAATTTTTTAAAGAAAGTTTTAATTTTTTGAAAATTAATAATTTGAAATTGAATTTACTAAAAGAAATTTGTCTATGAAATATTTGTCAA  
GTTTTATGTTGAAAATCTTTAGATTTTCAATGGGATTTACGGTATTTGTGATATTTCAGTATTTGTAATAATAGGATTGCTCTAATAGCTTTCAAATAATTTTAA  
AATAATATAAATGTTTCTAAATCCTTAAATACTTGATGTTTGATACCAACAATGAACATAAATATATTTCTTTTACTCTTCAATACCGCAAATACCAGAAATA  
CAATAAGTCCCATCAGTTTTTTTTAATAG**AGCACAAATACAAGAATCTTACAAGAGTTTTTA**NNNNNNNNNNNNNNNNNNNNNNNNNNNNNNNNNNNNNNNNNNNN  
NNNN**CTCTGGACATTCCGTATGAGCACATCAACGCTGGATTACTGTGCTTCAGAGCACATGACGGAGAAGTACGCGGAGATGAATCCGCAGAAGGAGATCCCCGTTCTCGATG  
ACGACGGATTCTTCCTTCCCAGAACGATTCGCATTCTGCAGTATCTTTGCGATAAAATCCGCCCGGATTCTGAGCTCTACCCAAAAGAGCCAAAAGCTCGCGCTATTGTCAA  
TCATCGTCTCACTTTAATCTTCCTTCTACTACAGCAGCATTTCTATGTATGTG**GTGAGTATTTGTTTTATTTTCTTTGTTCTTAAATTTTTTAAAGAAAGTTTTTA  
AAATTATAAATTTAGAATTAGAATTGAATTTATTAAGAGAAAATTGACAAAAGAAATATTTTCGTATTCTCAAAGTTTCATGTAGAAGTTCTTAAGATTTTTGGTGG  
ATTTACGGTATTTGTTGTTATTTGCAGTATTTGTAAGAAGTATGATTTGTCTTAAACCTTCCAAATAATTTAAAATGATAAAATATTTTAAATCTTCAAATACT  
TGGTATTTACATACCAACAATGCCAACAATGAACATAAATTTTCTTTCCATTCAATTACCTCAAATACCAGAAAATACCATAAGTCCCTTTAATAGTGACACAAATA  
CAAGAACATTTCTACAAGAGTTTTTAGACTTCTCAAATAAATAAGAAGCAAAAATAAATCTAAATCCTTCAATACCTTTAAATAGTTTTTTGTTTAAATCTTCT  
TCTTCCCTTCTTCAAAATTAATACAAATCTGTAAGCTTTTGATCAGCGACTCTGCACCTGTTGCATTTCCAAACGCTCCAATAAATTTAAATTTGATTTCTC  
ACAGCAGAAAAGATTTATGAGAGGATGGCTAGAAAATGAAAGTAGTCTCCTTCCCTTGGCCTGATTAAATCAGTATTAACCCCTTCGCGCTCTATATTTCTCAATCAG  
AACTTCTTCTTTGGCATATTTCTGCATAAAAGTAACGTACCTATTTTCAATTTAAGAAAATAAAGTCAAGTTTTTGGGAACCAAATAAGTTAACCCCTTAAGGTT  
TTTTGGGTGCATACGCTGACCCAAACGTGAACATTTTTATTTTTTCAATTTTTATGAATGTAATTGTTTTCCATGTTACAAATGCATCAAATTCACGCATAAGGGGT  
CAAAGAAGAGCTTCTGAGTGAAGAAAGTCCCTTAAAAAAATTCATAGATAAAATCGCGATAAAAGAGCGCATGTTCAATGTTTATGTTTACGTTGGACGTTA  
AAGGGTAAATTTAAAATAAAGAAAATAAATAAGGTTGAAATCACTAGAAAATCGAGTTTTTTTTAAATCGTTTTTCTAGTTGGTCTTAAAATAAGTCAAGTCTTAA  
AAATTTAAAGTATGATTTAGGTACGGGCTTAAATTTTTCAGTGCATCTAAAGTTTAAAGTCAAGTTTTTCAAGTCCGGCTTAAATTTTTGTTAGTTTTTTAGGC  
GGGCTTTAAATTTAGGTTGTTTAAATCTTAAACCTTTTTTAAAGTCCGATTTAAAAACTGACTCAAAGTTAAAGAACGGCATAAAACCGACCTAAAATTTAAGC  
TTGACTTTAAATTTTTGCCCAAACATTTTCATATTTAGCCAGCATATGACCCAAATGAACGCGAAGGGTTAATTAATCGAATAAATTCGACGATTTTTTTTTTAA  
CAG**ATGGCTCCAATTTCTTCGACTACCCCGGCACGCCAATGGTTTGAAAG****AAGCTCAACATCTCTCTGGCTACATTTGAGACTTACCTCAAGCCGCTCTGGGACGAACTA  
CGCTGTCTGCTGATCATCTCACCATCGCTGACTTCCCCTCTGTAAACGCGCCACCCTCTGCTCTGAGGGCATTTGGCTTTAGTCTCGATGAGTACCCCTTGTAAAGC**NNNNNN  
NNNNNNNNNNNNNNNNNNNNNNNNNNNNNNNNNNNNNNNNNNNNNNNNNNNNNNNNNNNNNNNNNNNNNNNNNNNNNNNNNNNNNNNNNNNNNNNNNNNNNNNNNNNN  
NNNNNNNNNNNNNNNNNNNNNNNNNNNNNNNNNNNNNNNNNNNNNNNNNNNNNNNNNNNNNNNNNNNNNNNNNNNNNNNNNNNNNNNNNNNNNNNNNNNNNNNNNNNN  
GATCATCTACAGACCGCACCTGTTCATTCCTTAAATAAATTTAAAATTTGCATTTCTCACAG  
CAGAAAGATTTATGAGAGGATGGCTAGAAAATGAAAGTAGTCTCCCTCCTTTGTGCTGATTAATCAGATATTAACCCCTTCGCGTCTATATTTCTCAATCAGA  
TCTTCTTTGACATATCTCGGTAATACTACATATTTTCAGTTAAAATAATATAAATTAAGGTAATTTAAAATCAAGAAAATAAGTAAGGAAATTCACTAGAAAATC  
GAGGTTAAATTTTTAGTCCGTTTTCAAGTTTGGTCTTAAACTTTAAAGTCAAGTCTTAAAATTTTAAAGTCAAGTCTTAAAATTTTAAATCGGTC  
TAAAGTTTAAAGTCAAGTTTTTAGATCGGATTAAAATTTAAAGTCCGCTAAAGTTTTAAAGTCAAGTCTTAAAATTTTAAAGTCAAGTCTTAAAATTTTAAAGT  
AGTATCAAAAATTTAAGTCCGCTTAAAGTTTAAAGTCAAGTCTTAAAATTTTAAAGTCAAGTCTTAAAATTTTAAAGTCAAGTCTTAAAATTTTAAAGTCAAGT  
AATTAATAATTTAAGCTCGACTTACTTGTGTAAATTTGCCTGAAACGTGTCATATTTAGGTGAGATATGACCCAAATGAACGCGAAAAGGTTAATTAATCGAATAA  
ATTGGGCGTAAATTTTTTTTTTAAACAG**ATGGCTCCAATTTCTTTGACTACCCCGGCACGCCAATGGTTTGAAAG****AAGCTCAACATCTCTCTGGCTACATTTGAGACTTTA  
CCTCAAGCCGCTCCGGGACGAAGTACGCTGCTGCTGATCATCTCACTATCGCTGACTTCCCCTCTGTAAACGCGCCACCCTCTGCCTCGAGGGCATTTGGCTTTAGTCTCGATGAG  
TACCCCTCGTTAAGGCTTGGTACGGCAATTTCAAGCAACAACATCCAGATCTGTGGGCCATTGGGG**NNNNNNNNNNNNNNNNNNNNNNNNNNNNNNNNNNNNNNNNNNNNNNNN  
NNNNNNNNNNNNNNNNNNNNNNNNNNNNNNNNNNNNNNNNNNNNNNNNNNNNNNNNNNNNNNNNNNNNNNNNNNNNNNNNNNNNNNNNNNNNNNNNNNNNNNNNNNNNNN

> **LLOJ002711\_a** (>112 aa; ~2 exons) | **EDITED (PARTIAL GENE - EXON 2 MISSING)**

MKLYAVSDGPPSLAVRMALKALDIPYEHINVDYCASEHMTKEYAEMNPQKEIPVLDDDGFFLSEIAILQYLCDKYRPSQLYPKDPKARAIVNHRLNFNSAFYSSI  
SMYV

> **LLOJ002711\_b** (>161 aa; ~2 exons) | **EDITED (PARTIAL GENE - N-TERMINAL GAP, C-TERMINAL GAP)**

LDIPEYHINVDYCASEHMTKEYAEMNPQKEIPVLDDDGFFLSEIAILQYLCDKYRPSQLYPKDPKARAIVNHRLNFNSAFYSSISMYVMAPIFFDYPRTPIGLKK  
LNISLATFETYLRSGTKYAAADHLTIADFPPLVTATLCLBAINFSLDEYPLVK

> **LLOJ002711\_c** (>87 aa; ~2 exons) | **EDITED (PARTIAL GENE - EXON 1 MISSING, C-TERMINAL GAP)**

MAPIFFDYPRTPIGLKKLNISLATFETYLRSGTKYAAADHLTIADFPPLVTATLCLBAINFSLDEYPLVKAWYGNFKQQHPDLWAIG

#####  
##### GST omega #####  
#####

##### PPAI000142 - GSTO #####

>AJVK101076482.1 forward | **PPAI000142** (pre-editing) | **PPAI000142\_a** (post-editing)

TTATTATTATTTGAACTAGAAACCACACTATGGTTCTTCGAGTTCTACATAGCATCATGTACATAATACAATTGAATATTCTGAGCATGAGAATACAATTTCTAAT  
TGATATGTTTTCTCACAGGCAGGTGTGTATGAAACACAAATATGAGTATAATAGATTTTGAATGCTCAGTTTACAATTGTCGTAAGTGTCTAAAATATAGCTAT  
AGTATTCATCTCTTAAGACGATATTATATCATTTACAAATTATCTAACATATTGTGCGACCTGTACGACTGTACGCTGTTTTCAGAATTCTCTCGCTAATATCACAT  
AATTCGTGTTTAATTTCCATCTTTAACACAATAAAACAATTGCGATGAAAATATCTAGACAAGTGGAAAATATTAATCTCTAATAGTTAAAATGAATTTACTACA  
ACGATAAAAAGCTTTTTTAATCGCACTTTAGATCAAAATTGACAGTACAATTAATAAATGTTGAATCATTAAAAAGTAAATAAATCAAAATGTCCATTATTTTTATGAT  
CTAAAATTGTCAAGTGACCACAAATAGTTTTTATATGTACAATTTAGGGTATTGAATTTATCTAATCCATGCAATATCTGCAATAAGTGGAAAGCAGCATGCCTT  
CAGACGGCTCAAGCTTCGAACAACGTATTTTTTCAACACGTTTTTAATGAATCAGATCCATATAATATAAATTAATAGCCAGTTCAATGTCTCAAATTTCTA  
ATAAAGAGTCAATGGTAAAGTGATATAAATTTGGAATTAGTGTACAAAGTTGGACAATTCGCGGTACAAGTTGGACATGGCTTTTTCTGTGATAAATGCAGTACAA  
GATTTGTTTTTAAGCACAAGAACCATATTATAAACTAAAGCAATAAAAATATACAAATAAAAATGAAGTACTAAATTTATCAAGACAAAAGGGGAAGGAGGTACA  
CACAAATACGATGAATGGTTATTAATAAAAATAAATAAATTTCAAAATTTATAAATTAGCATAATACAAAAAAAATATCATTATAATAAATAGGTCTATGTGGTCTATGT  
GAATATTATAAATAAATAGGTGTGATTAGGAAGGAATCACACCTAACACAAGGAAGGAATATTCTGAGGATTTCTTAACTCATTAGGTCTATTTATAAGCTTTA  
TCAGATATCCTTAAAACCTTTTACAAAATCTTTTTATTCGTTTATTTTACATTGGACTATTAGAGTATTATATCCGAAAAAAGAATTTTTTTCACACTAAAAT  
AGGGTAAAAACAGACAGATGGACAGATTGACAAAAAATAAGTATATGGACAAAAATACATAAAAAATGTCTCTATAGGGCAAAGTGATAAAAAGTTGGTCAGTAGTG  
GTACTAGTTGGACAATGGTACAATTTGGACAGGGCAGTACATATATTTGAATCTGGTACCATCGCTTTTCTAAACAGAATAAAAAATCGGATCTTAAGCACAGTTT  
AGACTCGCACCATGCACAAATGGCACATGACTTCATCGGCTGCCCCCAACCCCTCTCTTAACTAACGCGATGTCAAAGTAACTCGAAAGTTCAGTCACTTGCCG  
GAATCTTTGGGTATTTGGCACACAGCAAACTACGGTTTTTAATAAAAGAAATAAGGTTTGTTCAGAAGTTTAAACCCTGTGTAGACCTCAGAAAAAGTGAAAAC  
**ATGAGCAACGGAAAACACTTAGCTACAG**GTGAGTTATCATATATCTTTTGGCGGTATTTTGGGATTAATTTATCTCTGATAATTCTATGTAGAGTCAAGATAACTT  
TGAAAAATTTTATAGGAATTTTCTAATAAATATTAAAAAGATTTACTATATGCACAGAATTTTTTTTTCTTTTCTAAAAGTGTCTAATTTATTATAAATAGTAAA  
TATACTTGTAAGATATGTGGAGAAAGTATTTTTAAAAAGAAAAAGCGTCAGTGGCATATTTTTAGAAATGACGTAATAACATTGAAACTTCTCTTTTCACTGAAA  
TCTTCATGCCGTGAGAAACATCAATAAATGTGTTGTATGGATGCAAGAGTATTTTCTGAAAAATTTTTAG**GTGCCCTTGTGCCACCCTTCAGGATGATGGTAAGAT**  
**CCGCCTCTACTCCATGCGCTTCTGCCATATGCCCAACGTGTTTCATCTTGTCTGGATGCTAAGGATATCCCTATCATACGACTACGTAATCTTCAGGCAAAGCC**  
**AGAATGGCTCTATGACCGAAGCCCTCCAGGTACCGTTCGCCGTGGATCTACCCAAGAAAGTGGAGGTCGCGTCTATATGAATCTTTGGTCATATCAGACTATCT**  
**CGATGAGAAATCCCAACAGGCCCCCTATATCCACGTACACCTTTGGCAAAGCCAAAGGAGCGCTCTGCTGATTAAAGAGTTCGATACAGTATGACGTGATGTACAA**  
**AGTGTTTTTGGGGGAACATGTCCCTGGAACCTTTGACGAGATCAGCAACAGACTTGACTTTTTTGGAGAAAGAACTTCAAACACGTTGGATCCGACTTTTTTGGCGGAA**  
**TGTACCCGGGATGGTGAATATATGATCTGCCCATGGTGTGAAAGAGCTGATATGCTTACATACCTTCTGGGAGATAAGTACGCTCTGGATGAGGAGAGATTTCCCAA**  
**ATTG**GTTAGTCAATTTAAAAAGTTAATAAGTTTTAAATAGATTACACACTGAGAAGGAGGGT

>JH661954.1 forward | **PPAI000142** (pre-editing) | **PPAI000142\_a** (post-editing)

AAATTTTATTTTAAATAATATTAATAGAAATATTTTATACCGATTTTGGATCAATACTGGAGGGTAAAATGAACATTTCCGGAATGTTATTTTAAATTTTTTCGGATTT  
CTCTCAGTGCAGTGTTCACAGTGGGCAAAATTTGCACATCTTGACTGTTTTAACAAAAGATCAAGATCTAATGATAAATAATTTCTATTAATATTTTAAAAATAAAA  
TTTTATAG**CTCAAGTGGAGAGCTCTGATGAAGGAGGACAAAGCCGTTAAGGGATCTACCTGTCTCAGGTGAGGTGCAATGCCAAGTACATGGAAGGACGTCGACAGGAATG**  
**CTGATTATGATATGCTTGT**GTAAGCGGAAAATTTGCCCTACCTACAATAAATAATATCACTAATAAAGTGTGGCTGCAGTAAATTTTCAATCATTCAATCA  
ATTTCTTTATCACTATTTTTTTCTCGGCCATATCACAGAATTTTCGATTTTGTATACACTATGAAAAAATAGATTGCTATTTTCTTATATTTTGTCTTTAAAAA  
TCTAAGAGAATTTGATTTTTTATCTTTATTTTCAG**AAATATTGCTAAGAAACAGCGAACGTCCTAA**TTTTTGTATCATGATTTTTATCATTGATCACTCTGGCACTGTT  
CTTACGATTTTTTATTTTCAACTTTGCATTTCAATGTAATCAGGGCCTTTATTAATATTTTCTATATCACTGTTAATGAGAGAAAAAGATTTATTTTGTACTTTAA  
AAAAAGCATGCATGATAAAGCGATTTAAAAACGAATCAATGTAAGAAAGAAATAAATAAGATTTTTGTAAGCAAGTTTATTTCTGTTAGCTGAAAGAAAAATGTTTAA  
GTTGAAATTTTAAAGTATTGCGTACAGTGTTTACACGACCTTCGCTTGAATTTGGTGTCTAACATGATGGTTCAGCTTATGTAATTAATTAAGCAATCGTTCATAT  
TCACGAAATTTTAAAGGTTTCAAAAACATTTTCCAGAAAAAATCAAAATAGACAAATCACTATGCGAGTACACAATCATTGTACATTTTCAATTTGCTTAA  
ACCGCTGCAAAATGTGTTCAAGCTTCTACCTTTGACTTTGACTCAAGATCTCCCTTCTGAAATTTGTCGCTTCTCTCTTTTCCAG**ACGTTCTCGGAAGGAAAAGAAATCT**  
**TCCACCACACAATTTGAGAGAATTTGA**CAAAAAAAGAAACCATTTTCACTCTCCTTAAAGAAAAAGCCTTTAAAATACCTCTAAGAGAAAACAAAACCTTAATTTTATT  
CTCTTTTCTTTTTTTTACTCTTTAAATTAACCTTTTGGGTTGGTTTCCAGTCATGTCTATTTCTTTTTTCAAATAAATTCATAATTTATTTTATAATAAATGTATAT  
ATCGTAAAAAATAATCACTTGAATAAGTTTTTTTTTGTCTTATATACAAATCTTCAAATTTGCAGGAAAGAACATCGACGAAATATTTCTATATATATTGATTTTAA  
TAGGGAGGAAAACCGGGATGTGCGTTTACTGGGTCTATCTGTTAACTCTATCTGAAATATTTTCTTTTATTTATTTAGTTTTTTTTTGTTTTTTACGAAAAAGATG  
AAGATTTTAAATAAACAATTTTATAGTTTTTATTAATATCTGTTTATAAATACTTCAATAAGGAATTTTTCTCAAAGCAGAAAAATTTCTATTTACGAAACCAC  
TAGAAGAGTTGCATGCAACTATTTTCAAAACATTTTCTATTACTCGCTAAGATAGAGTTTTACTAGAGGGAAGATATTTCCGCTAAAACAACCTGAGCTAAAATTAGTA  
TAACTTGAAATTTTACGGTAAATGCCCTAAAAGTTTCTATCTGAAATTTTACAAATCAATTTCTATGATCTTTAAAATGATCTGGTAAAAATCGTTAGCTTTT  
CTGTTTTGATCTCAATAAATTAATATGTAATAGTTTTCAGTAAAGATAAATAAATCAATAAATGCGAAAAATGATAAATTTAATTTTCAATCATTATAAAGC  
AGGGTCCCGGTCAAATCCGAAAGCAAAATCCCGAACGCCAAAATCCGAATGCCAAAATCCCAAATTTTAAAAGTGCATAGCTACTCTTACGATTGTACCCGC  
GCTTGTGGGGCAAAGGAAATCTTCTGTGCTTGGGAAATTTATTGTAACAT

>**PPAI000142\_a** (253 aa; 4 exons) | **EDITED (EXONS ALTERED, GENE SPLIT ACROSS 2 SCAFFOLDS)**

MSNGKHLAT**GAPLPTLQDDGKIRLYSMRFPYQVRVHLVLDKADIPYHTIYVNLQAKPEWLYDRSPPGTVPVAVDLPNESGGASLYESLVISDYLDEKFPQRPLYRPTP**  
**LAKAKERLLIKKFDVIVDMYKVLGHEHVPGLTEISNRLDFEKLQTRGSDFFGGNVPMVDYMIWPWCERADMLTYLLGDKYVLDERFPKLWKVRALMKEDKAV**  
**KGSYLSGEVHVAKYMEGRRQGNADYDMLVNIKKQRTS-**

##### LLOJ009136 - GSTO #####

>JH689401 forward | **LLOJ009136** (pre-editing) | **LLOJ009136\_a** (post-editing)

AAAAGCTCCAAAGCTTAAAAATACTACATAAATTTAAATACAGAATCAGAAACATTTTTCTGAACCCCTCTGTAGGAGAATCCGTTGACTTTTTGAAAGCGTGGAAACA  
GTGAAGATGCAAACCAGCGTGAATGGAAGCATCTGGCCTCCATCAGCTGCCCCCATTCCACTTCTCTGCCACCAGTACAGTAGGT**ATGTCAAAGTTGTTCG**



TGAGTTGAGTCACTCGCCGGAGTTGAAGATTGTTGTTTGGCACACCCGCTAAAGCCACCTCCGTTGGTTTCTTTGCACCTCTTCTGAGGCATCTTAAAACTTGGTCAGTCCAC  
CACAAAGTCCCGTGAAAATGAGCAACGGAAAACACTTGGCTACAGGTGAGATTGATTGCGCCGCAATGAGCCCCAGAAAATTCATGGCGAGGTTGTGCATAAATTA AACCA  
CGAAGGAGATTTTCTTGGCGTGTTCATGAAGAATTTCTTCAAGAACAAAAATTTCTTAAAGGCTTTAGATGAGTTTTTGGGAAGGTTTTGGGTGTTCAATGAAATTT  
TCTAAGGGGCTCAATGAATGGGTGAAAGTGATTTTAGAGAGAGAGCGTCAGTGACATATTTTAGGCATGACGTAATAACATTGAACGACGACTCTTTCACTGAAACC  
TCCTCCTGAGCAGCAGCAACAATACAGCAGTAAAGTGTGAGAATTTCAAGAATTTCTCCATTTTCTATAAGAAAAATATTTAATATGCTGCTATAGAGATTA  
GAAGGAGATTAGTTGAAGATTGAAAGAAAAGAAAAAGAGGCCCTCAGAGTTCGAGTTTTTTTTATCTCCCTCAAGATAAGAAGACTCTTGAAAAAATCTCAAGAAGAA  
ATTGATGAAGATAAAAAATTTACATTTTCAGGTGCTGTGTTGCCGTCCCTGAGCGACGATGGGAAGCTCCGGCTGTATTCAAATGCGCTTCTGCCCGTATGCCCATCGTATT  
CACCTCGTCCCTGGACGCAAGGACATTCCCTACCACTCGATCTATGTGAATTTGAAGGCAAAACCCGATGGCTGTACGACCGTAGTCCCGGTGGCACCGTGGCGGCTATTG  
ATTTGCCCAACGAGAGCGGGCGGCCCATTTGTACGAATCCCTCGTCATTGCTGACTATCTGGATGAGAAGTCCCCACAGCGCCCCCTTACCCGCGTACCCCACTGGGGAA  
GGCCAAGGAGCGGCTGCTCATCAAGAAATTCGACACGGTTCATCGAGGTGATGTACAAGTCTTCATGGGCACACGCTACCAGGCACCATCACGGAGATCAGCAACAGGCTG  
GACTTCTTCGAGAAGGAGCTCCAGGCACGCGGAAGTACTTCTTCGCGCGCAACGTACCCGCTATGTTGGACTACATGATCTGGCCGTTGGTGCGAAAAGGGCTGATATGCT  
CACCTACCTATTGGGGCACAAGTACGCTCCTCGATGAGGAGAGATTCCCCAAATTTGAGAGATTTATTTAATTTTTTAAATGAGCTTTTAAACCTTTCTCGTTCTTTGG  
ATCATACGAGGACTTTGAAGAATTTAATCTTTTTTCCAAGAGAGAAAATTCGTTGAATTTACGTAAATTAGATCAAAGAATACGTTTTGACTTAAAAATATTTCTCTGAG  
AGTCTCATAAAATAAGAAAATTCGTGATGTAAGATCGATTTTCTATGTTTCATCGCGACGCAAAAAGCCTAAATGGTTAAATTTAGTGTCTTAATATTTTAGAACC  
GAGCTAAATATTAAGAGAAAATCAAGTTTAGCTTTAGAAAAGAAAACCAAGATTATTTGGGATGATAAATAAGAAAAGAAAACATAAGATTAGATAGATT  
GATAAGAAATACAAAACAAAAATCAAGAATGATGAGAGTTTCAAATTTGTTGTATATTAATTAATAACAAGACCACATATTTGATTTCTGCAACTTTATACCTCG  
ATATGATTAGAGGTTTAAAGTCTATTTGTGCTATCTGAATCAGCAAACATAGTCCACAAGATATAGATTTATCAGCGGATGCGACATTTTCTGATTAACCTAAAGCTT  
TTGTTTTAGTTTTATATTAGAGAATTAATAGAGTTTTTAATGGTCAGATATCAGTACATTTATTTTTAAAAAATCTATGTTTTAAGATTAAAAACATAGAAAGTAAAAAA  
TCGCGGTAATAATAAACATGTAAGAAATCATATCTTTTTGAAGCTCAAACAGTCAATTTATTTGTTTTCTAATTTCTTTTAAAAATCTCAAAGTACGAAAACATCGAA  
TTTTGAGAAAAATTTAAGTCATCGAATTTAGATTAGGACGTCGGAATTTATAATTTAATGTTTAAATTTTAAATCCATAAACTTAATTTAAAAGATTGAAATGGATGG  
AAATGATAAAATTTTATAATTGACGTTAAAACATCGAATAAACTAATAAATTTTATTTCTTTTTGCAAGTTAGTACCTAAGTCTATTTATCAATTTTCGATATTTTA  
ATGTTGGCAAAGAAATTAAGAAATTTTTCATTCATTCGATGTTTTAACTTAAATTTGATAAAATTTCTATGTTCTTCTATGAACATAGAAGGAATAGGATGAGATGAA  
AATTTCTGTAAATATCAGCAATAAAACATAGATTTCTTTTTATTTAAACAATTTTTCATAATGATAAAATTCAGAAATTAAAACGAATAAATTCGATATAACTT  
ACCAATTTCTTCTTCTTTTGTAGGTCAAGTGGAGGAGCCTGATGAAGGAGGATAAAGCTGTGAAGCTTCTTACATTTCCGGCGAGAACTACGCTAAATTCATGGAGAC  
ACACCGCCAGGGAGTCCCTGACTACGATATGCTCGTGTAAAGCGACCTATCCACATCTTTTAAACAAAACCAATGTTCTCGACTAATCCGTTGGCCTGCCTAATTT  
TCACACGCAATTCATCACCTTTGACCTCCTTTTTAATTGACTTTTTGTTTTTAAATTTCTCACTCAAACATTCAAAATTTCTTTTTGGCCAAAATGCTAATTTATGTTTT  
TTTTAACGATTTGTTTTGCGGGGAAAGTTTTCTAAAAACGAAATCTGGATTTTTTCTCTACATTTTCAGAAATGTTGCTAAAAACAGCGAATCCTTAA  
CAAATCTCGT  
GCTTTTCAAGTGCCACATCTTTAATTTATTTTTTTTATTACAACTTTTTGTCATTATAATTTGTCTCGCATAACGCTCTGATGGCCTTAAGGATCTTTTCAA  
GATTATGAAATCTTTTTAATATTAGATGATGCATTTATGGATGTTTACACGATGTTGAAAAAATAAATTTCAAAAAATA

> LLOJ009136\_a (253 aa; 4 exons) | EDITED (EXONS ALTERED)

MSNGKHLATGAVLPSLSDDGKLRLYSMRFCPYAHRIHLVLDAKDIPYHSIYVNLKAKPEWLYDRSPGGTVPALDLPNESGGAHLYESLVADIYLDLDEKFPQRPLYPRTP  
LGKAKERLLIKKFDTVIEVMYKVFMGTHVPGTITEISNRLLDFFEKELQARSDDFGGNVPGMVDYMIWPWCERADMLTYLLGDKYVLDEERFPKLVKWRSLMKEDKAV  
KASYISGENYAKFMETHRQVDPDYDMLVNVAKKQRTS-





TTTTTCTCTTGTCTGAAATCCAGGCTTTTGTACTTCCGCTGCTTCTAAGCAACAGTCTTGTACTTCTTGAACCGAAGTATAATCTTCCGGACAGTGGAGG  
 GGAACAATTTTCGTCATTTTCGCGATCTCAGCATAACTTGCATTTGGATTTTTGAGATTATTGTCAACATTTAATCTTGGACGCTCTCCATCTTTTTCGCCCTACT  
 CAGTNNNNNNNNNNATTGGTTAAATAAATCAACTGGCCGAGTTGAGGAACCGGCCGACTAGAGGGTACTTTACCTTACACGCTTTACCCCTAAGTGTATGCATTTTTTC  
 GATGCGGTAAATTTTAAATGCGTAACATATGAATCATTTGACACTTAAAAAGCCCAAGAAATGTCGCAACATATTTTGCATATTTTACGGCGTTTTCGTAACCTAT  
 TGAAAAGAGGTCGTCCTGAAAGTATGCAAAAATTTCTGTATGCATAAAAACGTTTCACGCACCTTTTCTGTCTCCGAAAATATGCATAATCTGGGATCCCTGTAA  
 GTCAATTTTTCAAGAAATCTGGGAAAATATAAAGTGTGGAAGCCAGAGTACGAAAAGCTTCCCTATTTTCTAAGAAAATCATTTTTTTTATACAAGG  
 TATAAGTATTGTGTGTAGTATCAGTCTTAGTTCATTTTTCTGAGTGTATAATCAACAATCATTTGACTTCTCTAGAAAATCGGTTGGAATATAGACTTGATATTG  
 TATATTCAGCAAATCTTATGTAAATATCGTCTTTACTAGGAGAATCACTAGCAAGGACACCCCTTTTGTATTGGCGGGGAAATTTCCCTCAAATATCAGGCC  
 CTCTAAATGTTTATCTGACAGATGATGGTAGCAGACTGCCTCAAAAATTCCTTGCATTCATTCCTGCAATCTCCCTAAGGATACAATATCTCTCAATCCCC  
 TCTATATGCTACAAATGAGTGTGAATGAAAAAGAGGGAAAGTATTTGGAAGGGAAGAAACATATAGTTGAATAGAAGGTTGCGAGCATCTGCTGTAGGCTTGTGGT  
 ATTCTCGTTTGGAGAGTGTTCATGTCCTTTTCGAATGGAATTTCCCGGTGAAAATTTCCCATGCAAAATGGTGGAAAATTTCCCTCAATGGCGCCTCACCACGCAT  
 TCAGCTGGAGTGTTCATGCAAAATTCGCGAGTGAAGCCATTTCTGTGAGGACGTTTTTAGTGTATTATCAAAATATCTTTTCAAGTGAATTCAGGTGAGAA  
 ATTGCAAGAGTTTTGAGAAATGTCATTCGGGTGATTTGTGGGGGTGATTGTCCGCTGTGTTTTTCCGCAATGATGCTGCCCTGGGTGGCAGAATTGGCATTMTTTGGG  
 TAGGAAATTTCCGCTGTTTCCTCATACATATTTTAAATTCATCTCGTATGATTTTTCCGCAATGATGCTGCCCTGGGTGGCAGAATTGGCATTMTTTGGG  
 GTCATTTTGTGGTGCAGTGCATCTGAAGGACACACTGTGTACTCTTGCAGGAGAACACCCCTTTGGTGAAGAGAGAGAAAGAGAGAGAGAGAGAGAGTGGTGC  
 AACTT

>PPAI002540\_a (203 aa; 3 exons) | ACROSS 2 SCAFFOLDS

MPNYKVIYFNVKALAEPLRFLLAYGGIEFEDLRVSRREEWPTLKSMPMQMPVLEVDGRRVHQSISMARYLAKQVGLVGADAWEDLQIDIVVDTINDFRLKIAVVSYE  
 PDDVKEKLVTLNNEVIPPYLEKLDIAIARENKGFALGLKWADLYFAGILDYLNMTKDLTEKYPNLKAVVDNVLIGIESIKAWVEKRPVTEV-

[ The full length scaffold JH662805.1 up to the gene PPAI002540 was extracted and searched for evidence of  
 the first part of the gene. A BLASTx search of the 6-frame translation of the scaffold upstream of  
 PPAI002540 against *Aedes aegypti* and *Anopheles gambiae* predicted proteomes identified nothing. The scaffold  
 was very fragmented, with a lot of sequence gaps, which may account for this. tBLASTn searching identified  
 exon 1, unannotated, on scaffold AJVK01074729.1. tBLASTn searching using the missing 'middle' exon  
 identified nothing that did not belong to already-annotated genes. ]

##### LLOJ009036, LLOJ009037 (*LLOJ009037* in italics) - GSTS #####

>JH689328 forward | LLOJ009036, LLOJ009037 (pre-editing) | LLOJ009036\_a, LLOJ009037 (post-editing)

TTGGAGAGGGATAGAAATACAAAATAAGAAAAATAAAAAAAAAAAGAAGAAATTAATACGATCGCGCCAAATTCAGAAGGAATATTTGGGCGCCAAGCGATCCGCC  
 ATATAAGGGCAAAGAGAATGGGAGGTTGTCTAACGCGAAGAAAATCTCGTTCCTGTCAGATTACCCCAAGACGCAGTTAAGAGAAGCAAATGCGCCAACTACAAGT  
GATCTACTTCAATGTAAGCCCTGGCTGAGCTACTCGCTTCTTGGCATATGTTGGCATTGAATTTGAGGATCTGCGCTATCAGCGAAGAAATGGCCACCCTAAG  
TCCTGTAAAGTATACAGCTATGAATTTTTTAAAGGCAGAGCAAAACAGCCCTTTTTTTGGCAATTGACACACTCACCCCGATCGGAACAGAAAATAAACCCACCTTATGGG  
 CTATCAATGTATTCTTCACTAACTACAATTTCTAATAACTTCAATTTGTGTGCCACATTGAAGCATTCATGCATGCAATTCATTTCAGATCTTCCCTTCAA  
 TCTACTTTTGTGCTTTTTTTTCTCATCTCTGCAACAAGATCGCAGCAGTATCCCAATGTGTATCAATATTCGCGCGATCACAGCTCAGGAATT  
 CCCTCACAACATTTCCACGATTTTGTGGATTAATGAAAAATTTCTTACCAATTTCCACCCTCAGGAGGCTCACGAGATCACGATCGCGCCAAAAAATAAT  
 TTAAGTAACTTTCTAAATTAAGTATACAAACGCAGGAATTTTTTTTACAACACTGTAAAAGAGAAAGAAAAACAGAAATGGAGAACACTAAACACTCCAGAGTCAAT  
 TGAAGTGGTGTTTAGAATTTAATTTGCCATAAATTTGGGTGATAAGAATACTTAAACATTGTAAAATGAATAAGCGGGTGAATATGCGATAAATTTCAATTAAGGAGA  
 GAATGAAAATTTGAAATGTTCAATTTAATTTAGGGGACTCAGGGGGAGTGTATGCATACAGCTTATTAACACATCCCGCTTCTATCTAACGTTTGTATGTTTTNNNN  
 NNNNNNNNNNNNNNNNNNNNNNNNNNNNNNNNNNNNNNNNNNNNNNNNNNNNNNNNNNNNNNNNNNNNNNNNNNNNNNNNNNNNNNNNNNNNNNNNNNNNN  
 NNNTGTCAGTGTGCGCAATTGTCTGTGTGAAATTCGGTGTAGTCACTCAAGGGCAAATGT  
 CAAAACAAATGTGGGAAAATGAAAATAAATTTCTTGGTTTTCCGGCTTTTCATGTATTTCATGGCAGTTTTTCTATTTATAGTAGTATAAAGTGATCTACTAGT  
 GAAAAACCCACAAATACGGCAAAAACAGGGGGTGGCAATGGAACTCGGGGGGTGCAATTAGAACACCCTGGTGAAGAAAGTGCAATTTTAGCACTTTTTTTAA  
 TTACATTTATCTCAGAACAGGTAAGAGTTAGAATGTTTGCATCTATGGAAACAAGTTAGCCTATTTAAATGACCTTTTCAATGGTACCACACTGGGAAGATTTAAT  
 CCTTTTATAGGACTTTTTTCAATCTTCTGAAACAGAATTTAGGGGGTGGCAATTTGGCCACGTTCCCTTACATACAAATGGTATGGCTTCGATGATGTTTCGGC  
 GGCATATAAAAAGAAGCGCCGGGTGATTCGCACCTAGTCCACTTGGGAGGTTTCGTCAGCTCGCGGTATCGTGTATCGCGCCACTGTCTTCCAGTATAGGGCGGTCTAC  
 TCTCATAGTGAAATGCGGAAAATACTCAAAATGGAATAATTTGTAATTCCTTCTCTCTCTGAAAATAACTCTGTGTCATGATGTTGTTTAGTGTACTTTCGGG  
 ATCGTAGTCTATGTGGGTGATCATTTCATTTTTTTGGTGTATCTCAAGTTCATTCTATTAGCAAAATCTCTTCTTTTTTTTGTGTGTCACCAAAAAGGAAAAATGAGTTT  
 AGCAAATTAATTTAGAAAAGTGTGTTTTTTTGTACAAAATAAGAGAGAAAAGTGTCAACGTGTAGATCAGTGTGATCGCGAACAACGCCCACATAGAGGAAACTATT  
 TAGTGTGTCGTAAGAGTGGGGAAAAAACGTTCTCAATTTGAATTTTTTGTGGCCTGAGAAGCTTTTTTGAGAGGGATAGAATACAAAATAA  
 NNNNNNNNNNNNNNNNNNNNNNNNNNNNNNNNNNNNNNNNNNNNNNNNNNNNNNNNNNNNNNNNNNNNNNNNNNNNNNNNNNNNNNNNNNNNNNNNNNNNN  
 NNNNNNNNNNNNNNNNNNNNNNNNNNNNNNNNNNNNNNNNNNNNNNNNNNNNNNNNNNNNNNNNNNNNNNNNNNNNNNNNNNNNNNNNNNNNNNNNNNNNN  
 ATCCCTCTCCAAAAAAGCTTCTCAGGCGCAAGAAAATTTCAATTTAGAACGTTTTTTTTTCCCACTCTT  
 CGACACGATCACTAAATAGTTTCTCTATGTTGGCGTTGTTTCGCGATCAACACTGATCTACAGTGGCAGTTTTTCTCTTTATTTGTAACAACAAAAAAGAGAATTA  
 TACGATCGCGCCAAATTCAGAAGGAATTTTGGGCGCAAGCGATCCGCCATATAAGGGCAAGAGAAATGGGAGGTTGTCTAACGGAAGAAATCTCGTTTTCT  
 TGCAGATTACCCACAAGACGCAGTTAAGAGAAGCAAATGCGCCAACTACAAGAGTCTACTTCAATGTAAGCCCTGGCTGAGCCACTGCGCTTCTTCTTGGCATATG  
GTGGCATTGAATTTGAGGATCTGCGCTATCAGCGAAGAAATGGCCACCCTAAAGTCTTGTAAGTATACAGCTATGAATTTTTTAAAGGCAAGCAAAACAGCCTTTTT  
 TTTGGCAATGACACACTACCCCGATCGGAACAGAAAATAACCCACGGATGGCCCACTTCATGGGCCATCAATTTGATTTCTTCACTACTCACAATTTCTAATAA  
 TACTTCAATTTGTGTGACCACATTTGAAGCATTTCAATGCATGCAATTCATTTAGATCTTCCCTCAATCTACTTTTTTGTGCTTTTTTCTCATCTTCTCATCTTG  
 CAAACAAGATCGCAGATCAGTATCCCCAATGTGATCAATATTCGCGCGATCACAGCTCAGGAATTTCCCTCACAACATTTTCCACGATTTTGTGGATTAATGAAG  
 AATTTTCTCCACCAATTTCCACCACACAGAGGCTCAGGAGATCACGATCGCGCCCAATTAATCCCTCCTCGGATATCAATGTAAACAGGAATATTGAACTTCAAT  
 TACATAACCACGAAGATGATTAAAAAATGAAAGTGAAGAGCATTGCTCAGCAAAAACATAACAATTTTTATCAGTAAATACGTCGTGATAAATTTGCGCCATAAT  
 CATGGAATGTAATTTAAAAATAAATCCGAAGAATGCCTCAAAAACATCTTTTTCATAGGGGAAGGGTGGTAATGTAGTGAAGAAATAGAAGAATAAATGAAGGAG  
 AAATTTCAATTTGAATAAACAGTATTTCTTTAATTTGACGAATTAACGTATTCTTGAAGAGAAATTTGAAGGGCTCTCATGATGTCAAAACAGTAAGGAT  
 CTATTTATAAAGAGTGTAGGATTTATTTATGAAAATTTTTCTCAAAAAGAGCAGTTTTAAATAGCATTTTTTCCAGACTTTCCGATAGATTAGATTGATCTTTCTCT  
 ATCCAGGTTCCCTATTGGCCCTTATCAACAAGCGGTTATCAAAAAGTTTTTTCTTATTTACTCAGTCGATTAATAAATAAATAAATTAAGTAAATCTTCTAA  
 ATTAAGTATAACAACGAGGAATTTTTTTTACAACACTGTAAAAGAGAAGAAAAACAGAAATGGAGAACACTAAACACTCCAGAGTCAATTTGAAGTGGTGTTTAGAAT  
 TTAATTTGCCATAAATTTGCGTGAAGAATACTTAAACATTTGAAAATGAATAAGCGGGTGAATATGCGATAAATTTCAATTTAAGGAGAGAATGAAAATTTGAAAT

GTTTCAATTTAATTTAGGGGACTCAGGGGGAGTTGATGCATACAGCTTATTAACACATCCCGCTTCTATCCCTAACGTTTGTAGTGAATTTTCCAATTTTAGACATTTG  
TTTTTTAACGTTTGACAATTCATTTTAACTTTGCTGTTCTGTCTTCTAACTTTTCGATCTTCTTGAATTTATTTTTTCTAACTTTTAAACATTTTCTTTTAAACATTTG  
ACGTCCTTTTTTTTTATTTGAGGTTTTCTTTTCCAACGTTTGAGGTTTTCTTTTTTAACTTTAATGATTTTTTAACTATAATTTAACTTTTCATTTAACTTTGACATTTTT  
CTTCTAACGTTCAATTTATAAATCGTTTAAAAATCTTTTCTGTGATTGAATTTACAGCGTTAAAAATAACTTACATCAACCTACGTCACAACAAAAATTTAAATAC  
ATAACTTCTTTTACCTACGAAGTAAAACATAAAATTCCTGAAGTTTAAAGAAGATGTTTAGACAACCAAATACTCTCCCTATCTCCCTCCCTTTTTCAGCAACTCAAAG  
CAAAGAATTCTGAATTTCTATGAAAATTTTCACTTTTTCATTGAAATTTTTAAATTTCTAACACATGTGTATTCAATTTAAATTTTAAAGAACAAAAAGAGATTCT  
TTTTCAATGTATCTTTTCTGCTCAACCAGCTAGAAAATGCCCCCTTATGTGGGCTGTGCGTGAATGATTTTCGAAGCTCCCAGAGAGGGAAGAAAAATGAGGAA  
TTTTCTAAAATATTTCTTTTCTGTGTACCTTTCTGGCCATTTAG **CTATGCCAATGGGCCAGATGCCCGTGTGGAAGTAGATGGACGACGAGTTCATCAGAGCATTT**  
**AATGGCAGCTACCTGGCGAAGCAAGTGGGTCTCGTTGGTTCCGATGCGTGGGAGGATATGCAGATTGACATCGTTGTGACACAATCAATGATTTTCGCCTCA**GTGAGTAG  
AATTTTCTTTTTCTTTCGGTCTTTTGTGTTTAAATGATCTCTAATGCTGGAATAATGATTTTCTTGCAG **AAATCGCCGTCGTTTCTACGAGCCCGATGATGATGTA**  
**AGGAGAAGAAGTTGGTCACTCAACAACGAAGTCATTCCCTTCTACCTGGAAGCTCGATTTCGATCGCCAAGGAGAATAAGGGACACTTTGCATTGGGAAAGCTCACAT**  
**GGCTGACCTCTACTTTGCCGCATCTCGATTACCTCAACTACATGACCAAGACCGACTCACGGAAAAGTACCCCAATCTCAAGGCCGTTGTGGACAATGTGCTGTCCATT**  
**GAGAGTATCAAGGCATGGGTTGAGAAGCGACCTGTCACCGAAGCTAA**TCTCTCAAAACCATTACACACACCCCAATGCACAAAAATCATCAACCCTCCGTTGGCATG  
GCATCATTGTCAATGGATATTGCATCTGGATTCTTCTGCACCATGTGTCTATAATTACTATTTTTACAAATAACACACCCTCAGTAATTTCTGTTGCCGAAGGA  
AATAAAGGCCTTTCTTTCAGTTTTCCGTTGCTAATTTTGTGTTTTTTTTTCTCTTTTACTTTCCCTGTCCCTTGAATGCCCTTGACCTATAAAAAGGGGGAGATGA  
AAAAGGAAGAAAGGATATCAAAAATCCTCTGATATTATGGG **NNNNNNNNNNNNNNNNNNNNNNNNNNNNNNNNNNNNNNNNNNNNNNNNNNNNNNNNNNNNNN**GGAAATAGTCTAAAAAC  
TCAGTTCTGATATAAGAAATGCAAAAAATTAATTTATTATCTAACTAAGAAGCATTTTTTTTAAATATAATAAGCAATCTTCTTTAAATCTTAAAGAATAAACAGTG  
ATTTTTGATATTAGAAAAGATCTTTTGTATCCAAGAATTTATCTTCTAGTTTGTCTTCTTGTCTGAACCAAGTAAAGATATTTCTATTTGAGAAACCTTTGTTAATAA  
CCAAAATTAGCCCTTTTTCGCTCAACTAGCTTAACTAAATGTGAAACATCGGGAGGAATCCACAAATATCTTCCGCTAGTTGATTTTTTTTTCTATGTTAGGCCCTGTG  
TTTATAGCCAGACTTAACTTTTCTAAGGCTAAGCTATAATGGTTTTAAGGTTAAGTCAATTTGAATCAGGACAGAATGAATTTTTCTTTAAATATTTTGCAAAAACG  
AAAAAATATTTTCCACCAGTTAGCGTCAAAAGTCGGACCTCAGTCCAGAATTACTTTGAACTCATATATTCGATTGTTGGCTAAACGACTGTTCTTTTAAACTT  
AACTAGGTTTTTAAACTTAAATTTTATTAAGCCAACTACGATGTTCAAAAATAAATTTGTACAGAAAATCGTTTTTCCACCGGTGAGCGTTGGAACTTAACTCTG  
ACATAAGAAAAGACTAGACTAACTTCAAGGAACAAAAGCCTGATTATAGAATGAAAAAATTTGGGCCAAGCTCACAAAACATAAAAAGTCTGATCTTAACTAACTTAA  
TCTAGCTTAAAAAACCTAAAAG

> **LLOJ009036** **a** (>44 aa; >1 exon) | **EDITED (PARTIAL - C-TERMINAL MISSING)**

MPNYKVIYFNVKALAEPLRFLLAYGGIEFEDLRVSREEWPTLKS

> **LLOJ009037** (203 aa; 3 exons) | **UNCHANGED**

MPNYKVIYFNVKALAEPLRFLLAYGGIEFEDLRVSREEWPTLKS **SMPMGQMPVLEVDGRRVHQSI SMARYLAKQVGLVGSDAWEDMQIDIVVDTINDFRLKIAVVSYE**  
PDDDVKEKKLVTLNNEVI PFYLEKLDLSIAKENKGFALGKLTWADLYFAGILDYLNMTKDLTEKYPNLKAVVDNVLSIESIKAWVEKREPVTEV-





> LLOJ005757 (226 aa; 2 exons) | UNCHANGED

MAKPKVFFYDLSQPSRAMMIFLNVAKIPYESLPVALRKEHLTEEFKAINRFQKVPICISDNFNLSESVAI<sup>R</sup>YLAAKHKIPDSWYPTDAKKQARVDEYLEWQHLNT  
RISCALYFLMLWKLPLLTGKQPKPEAVEEHLGRVVDLDAIENIWLEKTPFLAGNDITVADIWCACEIEQLILTPYDFRKRPRRLTAWLEKVRTQANPHYDEAHKVL  
KISERTSAKL-

##### LLOJ002025 - GSTT #####

> JH689467 forward | LLOJ002025 (pre-editing) | LLOJ002025 (post-editing)

TGCTATTTTAGGTACACACAGAGATTAATATATATATCTCGTATTGGCTTTCAAGCGATAGCATAGCTCAATCTCCATCGCAGAAGATGTATTGAGTTGTTGTTGT  
GCCACAAAAAGTCGACCTTCTCACTCACTTTCAGCCAGCTCAGCCTTGCAATTTTTCGTGTTGATTTCACTGAAATTTCTGCTCCAGAAATGGCCTCAAAATATAA  
GTTTTATTCCAATTTAATGTCCAGCCGTGTCGTTCCCTTGCAAAATGTTATGAATTTGGCTAAAATTCCTTTTGAAACTGTTACAATAGCATTTGGGTGAGTTTTATGAAGC  
TTTTTGGGTGTTATTTGTCAGGAATATGTAAGGTGTTGTCTAATCTCTCGTTGTAGTTGATCAGCCAAGGATTCCTTTGCCAAAGAGGTCAATAGTCTCTGCACAA  
TACCCTGCATCAATGATGGGGCTTCAAACCTAGCCGAGAGTATGCCATTTGAGGTATTTGGCAACCAAGAGTAGCCTCATTATACGATGGTACCCACGGGGCAGCAAT  
GAGGGCACAGTTGATGAATACTTGGAGTGGCATCACCTCAACATCAGAGCTCCCTGCACGGGATCTCCGCAAAAGTTGGCTCGAGCCTCGCAACAGCAAGCAGCCACCA  
AATCAAACGACCTCGATAGCCTCATGGGTCAAGTTAATCGCTCCCTGGATTTCCTTGAGAATCTGGCTAGCCGAAGGGGATTTCCCTCATTGGCAGTGATGCTCCGTGG  
CAGATATTTGGGCTATTGTTGAAATTGAGCAGCTCTGTGAGTTTTTTGAATTTATTTTAAACAAAAATAATTATTTTTTAAATTAATTTTCCTTTGCGAGTTTTTAAACCTC  
TAGACCCCAACAGAAGGACGCCCTAAGCTTAAGGCATGGATGGAGAGGTACGAAGGGACACTAATCCCTTTTACGATGAAGCCCACTACACTCTATGGAGTGTTCGTGATA  
ATCCGGCCAGAGATCCGAGCTTTAAGATTATTTTCTTTATTAATACTACTACAAAAGGGGTACTCATAAACCATTTCCAAGGGATTTTTAATACAGGACCAATACT  
TATAAATTTGTTATTTCTTTTCAAGGAAATTTGTAATGTTTGAATAAATAATTTAATTTGTAAGAATGTTTTGTTTTACTTGAATTTAATTAATTAAC  
TAGGTCAG

> LLOJ002025 (227 aa; 3 exons) | UNCHANGED

MASKYKFYSNLMSQPCRSLQIVMNLAKIPFETVTIAL<sup>G</sup>DHAKDSFAKEVNSLCTIPCINDGGFKLAESIAILRYLATKSSLIIRWYPTGARMRARVDEYLEWHHLNIR  
APCTGYFRKSWLEPRNTKQPPNQTTLDLSLMGQVNRSLDFLENIWLAEGDFLIGSDVSVADIWAICEIEQL<sup>F</sup>LTPLDPTTEGRPKLKAWMERVRDNTNPFYDEAHYTLWS  
VRDKSQRSQSL-

##### LLOJ008830 - GSTT #####

> JH690086 reverse | LLOJ008830 (pre-editing) | LLOJ008830 (post-editing)

GTAGCTCGCTAGGTAAGAAAAATTTTATTTTCATCAATGTTTCATGAAGCCAACGTTCTCAAAGTTTAAATATAGTTTGTGAGGAATATTTCTTCAGACTTGTCTACGAT  
ATTCCTTGAGACACAAAACATTCCTTACTGGGTAGTGACATATACCACAACAATAAATAAACAATAAATAAAGATTTTGCAAAAGAAAAATGTCTTACTCTTACGTT  
TGAATTTGGGTAAGAATTTATTAATTTTAAAGAATTAAGAATTTCTACAACATTAATCCTTTTCAGATTTTGACAATCCCTCAAAGTACACAATACCCTGAATAAGT  
ATCGGAAGAGGACGAGAGAGCAGAAAGAGCAACACTACACTATGTTTGTCTCCGAAAAGCATCCAGACTCTGGGAACCTTCTCACAAGAAGTACGATCAGATGTG  
GAATAAATTGACAGAGATTCTAAATACGAAAGGTCCAGGAAGACTGTGGATCAATGGCAGACAATCTCCGGGATTGGCGGTACTCGGTTACATTTAAGTACAGGAAGTAC  
AAGAACTTTGGAAGCCAAATTCGCGATATGGAATGAAGTTGTTGCAAAATTCGCGGATCTTGAAGATGAAAAGTACAAGAGAAGATTTGTCATCGTTTGGCTCAGCTCAC  
AGAATGGGCAGGAGTTCACTTTAGAAGATGATGAGATGTCTGGAGATCCTCTCCTTGAGGAAGTAGGAACGATGAGGACACAGAAGCAAAATGAGGAGAGCCCATGGATGC  
AACTGATAGTGTCTGATATATCTTCAGTGTGGTTTTCCAGAGGTGAAGAAGGAAATCACCTTTGGGAGCTCCATCAGAGAGAGATATCTTCGAGATGCACAACCAGCACA  
TCTGCTGATAGACTTCAACATGTCAGATGGACAGATAGGAGCATTAGAGATCTCCTGAACTTTGTAAAGATGACACTTGAGCAGTTTGGACCAACCAATCCACGAACTACT  
ACCGCAACTACTGCAACGTGAACCACCAATTTAGCAGTTTATTTGGCGCAACTGGCAAGCTGTTTCAGTTGAAGATGAACTCGTTCCGACAGCAGTACATGCAGACACAGTC  
GTTGATCAAACAGAAATTCGGAATCACAGCAACATACAACAACCTTATCGCAAGGATCGAGAGGTAGAAAATTCAAAATAATTAAGATTTTCAACAAAGCTAACGATTTCT  
TTTCAAATATTTTCAGTACAATCTACTAAATGTCCTTACTTTTCGACTTTGGACAAAATATTCGGCAAGGATCAACCTCGCGAGGAAACAGCAAGGAGACAGAG  
GAAACTTCCGGGAGATGAATTTAAGCTCTCCCTGCCATCAGAGATAACCGTTGCAATATCAAACCAACAGCACACAATAAATCCCACTCCAGGACCATTAGAGTCCACC  
AAGCTCAACTTTCAGCAGCAAAATGCAACAAAAGATCTCAGAGAACACTAGAAGCTGGAGCAGCTTGACATTTGAATTCGAGCTTTTGAAGTACAGGAAAGAACTGAGAGATG  
GAGAAGGAAATGGAGGCTCAGAAATTCCTCTTTGAATGCGAAATGAGGAAGGAAGAGATGAAATTTGCGAAAGAGGAATTTGGAGAATAAACGAGCTGAAGTTGAGAATATGA  
TGCAGATTTGAGAATCAACCCCTGGAGCAGGAAGAAGCAATTTGAACGGTACAGGATTCAGATGGAAACTGTTTGAAGAAATAAACAAGAACTTTAAAAACCCACCGCC  
AGAGGGCGGACGTTTTATTATTAGTTTTTGTGGAAGAAAAAGGTAACAAGTTTGAAGAAATTTTCGTGAATTTGTAGTGGAAAATCATGAAGAAGCAGGAGGATAATTT  
TGGATTCTGATGAGAGTTTCGATGAGGCCATGAGGTGAGTAATCAGTTTTTGTAAAGAATCATTAACTACTGAGGATTTATTGCTTTTTTTAGTCTCTGAAAGTTTGA  
CAATTTCTCTCATGTGAATCGGGGGAAGATGCTGAACCACCCGCAAAAGTGGCGAAAGTTCBAATGGCAAAACCTCAATTTGATGACATGAAGAAGTTTCTGAAGTACCTC  
AAGGATTTATCTTATGCATCAGAAAGTCTGAAAACAAGGAGGCTCATATGAGCATACTACAGGATTTCTGGAACTTATCCGGATTTAATGACACCTGGCAGGTTCT  
TTCATCGTAGGTTACAGGTATGCGGCATCAGTATGACCTTACAAGAAGTGGCTACAGGAGAAATGCGGCGGATTTTGTGAGAAATGTCATTTGAGAAAGGTAAGAAATATAT  
ATATTTTTGTCATTCAGGTAAGTTCTACAGTTATGAGCAAAATGTCCTTACTTTAAAAGAATAATCTCCTTAAGAATAATTTCTAAAATAAACCTACTGAAATTTCT  
AAGATTTTAAAGTAAATTTCAAGGATTTCTTGGTCGTAATAATGGATGAAATGTTGGAATGACGTCAGCCCAAGTAAATTAATCCCTTCGCACCTGCTTGAAACA  
TAGAAACATTTGAAACATGCGATCATTCTATCGCGATATTTATTTCTGAAAATGCTCCCAAAGGATATTTTCAAGTTCGAAACGTCCTTTTACGTTAGCTTTTTTACGTTAGTCT  
TAGCGTATTTCCAACTTAAAAATATATTTAATTAATTAATAAATTCGATAAAAATAAATGTTTTACGTTTGTGATCAGCGCATGGACGCAAAAGGGTTAAAAAAGAAGA  
ACACGCTGACCTAAAATGAAACATTCCTTTTTTTTTTAAATTAATAATGAAAATTTGAAATTTCTGAAGAGTGAATTTGCGTTGAATTTATGAAAAGAGATCAGAGAA  
AACATTTTACAGAAAACGATTTTCTAAATGAAATAATAGAATAGAATCCCAATAAAAGGCTCAATGTTTTAATGTTATTTCTTAATGTTTCATGCCTGATTTGCA  
AGGCTGTAAGGGTTAACAAATATAATTTAATCACTTATTCAGTGAAGAAATTAAGGGGCTCTCTGGGAAAATGTTAGAATTTACATAATTTTTAATGATGATAA  
TTTTCGGGTTTTCTTAAACATGTTTTCCGATGTAGTTTACATTTGAAGCGTAATTTAGAGTGAAGAAATCACTTTTCGCCATCTTAGGTCGACGCCCATCTTGT  
TGATTTTCCGACTTTTCCATAGAAGTGCCTTAAACATAAAGGTAGTTTTCTCAGGATCTACCGGATGGATTTTGTGAGGTTAAAAGCAAAATGAAAGAGGAAATA  
CCAATGCAGATTTNNNNNNNNNNNNNNNNNNNNNNNNNNNNNNNNNNNNNNNNNNNNNNNNNNNNNNNNNNNNNNNNNNNNNNNNNNNNNNNNNNNNNNNNNNNN  
ATATTTTCAAGTTCGAAACGTCCTTCTTTAGCTCTTTTTTACGTTAGTCT  
TAGCGTATTTCCAACTTAAAAATATATTTAATTAATTAATAAATTCGATAAAAATAAATGTTATACATTTGAGTACAGCGCATGGACGCAAAAGGGTTAAAAAATAAGAAG  
AACACGCTGACCTAAAATGAAACATTCCTTTTTTTTTTAAATTAATAATGAAAATTTGAAATTTCTGAAGAGTGAATTTGCGTTGAATTTATGAAAAGAGATCAGAGAA  
AAACATTTTACAGAAAAGATTTTCTAAATGAAATAATAGAATAGAATCCCAATAAAAGGCTCAATGTTTTAATGTTATTTCTTAATGTTTCATGCCTGATTTGCA  
AAGGTTGGGTTAATAAATAAATTTATCAACTTATTCAGTGAAGAAATTAAGTTTTTGGATTTTCTTGGTTCTGATCGCGTAAAAAATTTGTGAGTCTGTTAAAC  
GGTTAAGAGATGAAGGTGAAACTCTTAAACTGATAACGATATCAGACACTTCAAATATAATACAGATTAACAGACGAAAAGAAATATATCTCAAACCTCTCAT



TCGCTTCAATTTGTCTTTAGTGGTTTACATCAATTTTGTGTTTTCTGTGCTTTAATTCAACACGAAAATGTCAAAAATATAAAAACCTTTATTCAAATGTTATGTCC  
CAGCCATCAAGATCTCTCCATATTCTCTGAATATGGNNNNNNNNNNNNNNNNNNNNNNNNNNNNNNNNNNNNNNNNNNNNNNNNNNNNNNNNNNNNNNNN  
AATGACACCTGGCAGGTTCTTTCATCGTAGGGTTACAGGATGCGGCATCAGTATGACCTTACAAAAGAGTGGCTACAGGAGAATGCGGCGGATTTTGATGAGAATGTCATT  
GAGAAGGTAAGAATATTTTTCGAATCAGGTAAAGTCTACAGTTATGAGCAAAATGTCAAAACTGTGAACAAAAGTACATTTTTCCACTTTTCTCAGCCCCAG  
AGTGA AATTC AAAATGTTTGGAGAAATCTCAAGATGGCGTCGCATCTAAGATGGCGAAAGTGATTTTCTACTCTCAATAATAGGCTTCAAATGTAACC  
AATATTGAAAAACCAAGTTAAGAAAAACCCCAAGAAAAATAAAAATATTTAATTTCACTAGCTCTCACAGAGATCCCCCTTAAAGTTTTTTGGCTTTTCTTGGTTC  
TGATCGCGTGA AAAAAATTTGTGAGTCGTTAACCGTTAAGAGATGAAGTGAAAACCTCTTATCACTGATAACGATATCAGACACTTCAAATAATAACAGATTAA  
ACTGACGAAAAGAATTATACTCAAACTTCTCATTTGGCTTCAAATTTGTCTTTAGTGGTTTACAGCAATTTTTGTGTTTTCTGTGCTTTAATTCAACACGAAAATGTC  
CAAAAAATAAAAACCTTTATTCAAATGTTATGCCCAGCCATCAAGATCTCTCCATATTCTCTTGAATATGGCAGAAATTCCTACGATCCGTAACAAATTGCCCTTGAGA  
GAAGGTAAGTTGTAATGAAGTTGTAATAAGGTAAGTTGTTTACCCTAAATGAAATTGAGAATAAAGGATTATGGAACCTTTCCAGGATGATCAATTCACAGAATCTT  
TCTCAGACGAGTAATAAACTCAGAACAAATTCCTTGCATTATGATGAAGGCTTCAAAGTGGCAGGAGGTTTACAATTGTGAGATATTTAGCAGAGAAAACCTGATGAAAT  
TAGCAGGATGATCCGGTGGTCTCAGAAAAGCGCAGCGCTTGTGATGAAATCTGGAATGGCAGTCATCTGAATACCGGAACACCCCTCTCTGGATACTTTGCTGGCAGGCTGG  
CTTATACCAGBAAGACCAAGGAAGCCACCAATGCABAAAAGAGATGGAABAACCTCGCAATGAAGTTAATAAACTCTGGACTTGTGGAAAATTTATGGCTCCGAGTGGG  
ATTTCTTAAATGATAACCAATTGACCATTGCAGATATTTGGGCTGTATGGCAGATTGAGCAACTCTGTAAGATTTCTCAGATCTTAAACTATTTTAATAATATGA  
TTTTTTTGCATCTTTAAGTTCTTTTCAGGACTAACACCGTTGGATGTTATGAAAGAAGCTCCCAAACCTCAAAGCTTGGATGGAGAGAGTGAAGAATGCAACAAAT  
CCCTCTACGACAATGCTCACAAGACTTTATGGAGTTTAGTCATAGAAAATGAGCAAAAAATCCCATTTGTAAATAATTCAGAGGTGCAATAAAAATTATTTTGAACAG  
TTTTCTCTTTTGTGTTAAAACATTTCTAATGCCTCAGAAAGACATTTCTCGATCAAATGATTTCTGGCATCTGTATGAAAATTGAGCGAATCAAAAATAA  
ATGTTTCCCGTTTTGTATCAGTTTATGACCTAATGGCGGTGAAGGGTTAACTCATAATACATATGTATTATGTA AAAAAAACAGCTTTTTTTTTTAAAGCTTTGCAA  
TTTACGAAAATTTAAAATCTAAAGAAATTTGCTCTCAAATGAACATAAGAAGGAATGGAAAAGAAATTTCAATAAAAATTACACATAGCTCATAATTGAAAGAT  
AATAAATAAAATTAATCACA AATGTGCTACATTGTAATTTCCAGAGGTTAACTCCGATGTCGCTTTTTCTATGAAATGGATGAGGTAATTCAGGGATAAAAACCT  
CCCAGGCCCGGAGATGGAAGAAGGAACGACGTACCAAAGGCAGATGATTGATGCGAGAAAATAGGCCGAAGGTGACGCAATTTCTACGCTATTTCCGACCCGGAT  
GGATGATATAGATAGCAGGAGGTGCAACTCGA

> LLOJ008830\_a (229 aa; 3 exons) | EDITED  
MSKNIKLYSNVMSQPSRSLHILLNMAEIPYPDVITIALREGDQFTESFSDEVNKLRTIPCINDEGFKVAGSVTVRYLAEKTDEITQWYPVDAQKRARVDEYLEWHHLN  
TRTPLSGYFVASWLI PRKTRKPPNAKKMEKLNEVNKSLDLLENLWLRSGDFLINDQLTIIADIWAVCEIEQLSLTPLDVMKERPKLAWMERVNRATNPFYDNAHKT  
WFSFHRNEQKSHL-

##### LLOJ002682 - GSTT #####  
>JH691041 forward | LLOJ002682 (pre-editing) | LLOJ002682\_a (post-editing)  
AAGATAATCTGTGAAAATAAATTGAGATTTTAATTAATTAATTAAGCTTTTCAAACGACAAAATTAATCATCAAGTTCGTATCTTTAATAAGCTTTCAGGTGTT  
GATAGTGGTGTAGTGACCTGTTTTATCAACACAGCCAAAAGCAACAGGGTTC AAAGCTCATTTAGCCGAAAAATCGCGAATTTTCCAGAAATGTCGGGGGTTGCTT  
CAATTTTACTAGACCTCTCTTCCACCTTCCCGGCACTCATAACATTTCTCCGTTGCAAAATATCCCGTGGAAACCCATGCTGTAGCCCTCCGAAAAGTAAAGTCA  
TGCACCCACAGAGCTTGGGCATCACTGAACATAAATCTGCAATTTAGGAGACATCTCCAGGAGATGATCAACAAGGAAGTGATAGATTTCCCAAGCTTCCGTGATC  
AATGATGACGGGTTCCGGTTGCTGTAGAGTGTAGCCTAGTGGGGATGTCAAGAAGACAAGAGGATTTGATGATTTCTGGTATCCAGAGGATGCCAGGCACAGGCATTTG  
TGGATGAGTACCTGGAGTGGACACACAAAACATTCGCATAAGTCCGGATTTACTTCTTCAATTTGGCAGGAAATCCCTTGTATGACGGGGGAGAAGCCGGATGAGGCGAA  
AGTGGCGAAGTTGGAGGCTCAGCTGAACAACATATTGCATCATGGAGAATACCTGGTTGAAATGCAATTCCTACATTTGCCGAGAGAAGGTTTACAATTGCTGATGTTTT  
GCAGCATGCCAGATGAGCAACCGAATGAGTACATAAATTTATGTTGCTGTGTTGAGAGGCTGAGAGACTCTGTTGCATGCCTCTTGCGAATAAATTTAGCAGCATT  
CAAGGTTTTATTGAGATTTTCTGATGTTTATGATCTCGGTTTTATGAATTTGCATAAAAAGGATTTAATAATTTTCTTCAAAAATCTGAAAAAATTAAGTAA  
AAAAAATCTTCCAGGAAATTTGTGGGTTCAATCCCCTTGAATCCCAGCAAAAGCTCAGAGATGTTTTGACCGGTGTAAGAAGAAGCTCGATCCTGCTTTACAGAA  
ATCAAAATTTATCTACAAAACAGGCAACGGTCTCTGGAAGCGCCAAAACCTGTGAATGAGGAAGACCTTCTGCGCCGACGTGCCATCCACAGCTTCCACAGCAG  
TGCTTCTGATGTTGTCATACTCATGACAAAATTTTGTGGTGACAGGATAAAAAGAAAAGAAAAGGGGCTCTTTGAATAAAAATTTCTTAGGGTACAGTGCACTTC  
CTTCTTTCTGTGATCCCCAAAATGAGATGATGATCGTCAAATAAGGAGACAGAGAGGTTGGAAGAGTTAAGTTTCTCAGCAGGATATGGAGCAAAACATTAAGTAA  
GTGAGTTATTAAGGTCAGTCTGGAAGGATTTCTCAATTTATTTGATGAGATTTCCATGATTTTGTGACATTTGCCAGTTGCTGCCCCCTCCGATCACAGCCATCAAGAAGAGTCTAAAT  
TTGAAGATTAATGCCGAAAGGAGCTGGAGCGTTTTTCGCACGGAGAGGGATCAATTTCAAATTTGATGGCGGAAAACACTGCAAAATCCGCTACACAGCCATCAAGAAGAGTCTAAAT  
CCGCGAATCCGGAACCGTTGAGTTCCTGAGGATCCAGCGTGGCAGCTATTTGTGAATGACCTGCGTGAGAGGAATACAGCTCTCAGCAGCGAACTCGAGTCCCTGAGGCA  
GAGTTTGTGAGAGAAGGAGGGGATATTAGGGTGCTGCGAGAGCGGAAAGTGCAAGGTTGTCGAAAAGTGTGAGAAATGTTAGTACAGTGGGCAAGGAGGATTACCTCGTGCC  
GAATGGAAATGAAGAGAAAATCCAAATTCATTGCTCAACTGGAGGATCTCAAGAAAAAATAAGAAAATGAAAGAAAAATTTCTAAATTTATTTTCAAATTTGAT  
GGAATGTCAAATTTTCTTTCCAGAACGCTCAGCTGAATACGATTTCCGGTCTCAGTTGTATGAGAAGGAGAAGTGTCACTGAAAGAGATGCCTTCAAGTGCAAGGT  
TCATCGACTGAATCATGAGCTGCTGGTTGGCTCTCAAGGGGAATGAATCTCAAATCAAGGTTCTCGATATTTGATTCACTTTGTGCGGGAGACAAAATTTTGCAGGAGAGACTG  
AAAAACGTTGAAAATGAGTTGGAGCTGTCGACACTCGCTCACAAAATAAAGTAAAGATAAGATGTTCAATTTCTTCCATTTCTTGCATTCTCTAAGAAACTCCAGGA  
TTTCCCTTCCAAACACATGCGCTCAATTGATGTTAAAAGTGGCACAAAGGGGTACTTTGGGAGCTCTGCTGAGCTTTTCCAACGTATTTTGC AATATATTTATCAAT  
CGTTTTTCAATTGTAATAGATTTGTAATTAATTTGAAACACTTTTTATGATTTTAAAAATCAATTTTCATCAGTTTTTTTTGGGGGAACATCAAAATGATTTTAAAAT  
GTTTGGTTTATGGATCAAAAACCTTAATTTATATTTAGGAAGAAAAAGGTTTCCCAATAGTTTACAAAAAAGCAATTTTTTGGGAGGGAGCGGGGTAATGTTTCAT  
AAATAATAATTA

> LLOJ002682\_a (230 aa; 3 exons) | EDITED  
MSGVAFKFYYDLLSPPSRALITFFRANIPVEPIAVALRKGELHTEKYNKEVSRFPKLPINCINDDGFRLESVAIVRYVKKTRGFDFFWYPEDAQAQALVDDEYLEWHT  
NIRISSGLYFFTLWRNPLMTGEPDEAEVRKLEAQLNNTLDIMENTWLKNSYIAGEQFTIADVFAACDIEQPRICGNPLDSRPKLTAWFDRVKKLDPAPTEHHKF  
IYKYQRSLEAAKL-

#####  
##### GST Xi #####  
#####

##### PPAI008305 - GSTX #####

>JH665757.1 forward | PPAI008305 (pre-editing) | PPAI008305\_a (post-editing)

CACAACCATCCAATTTTGATAAATACAATCCTGATAACAGTCATTTGTTTATGCTGTCTCATGTATAGGTCATAATGGTAAGCTTACGATGATAATGATATGAAGT  
GATAATACTGATAAGAGTTTCAGTATTCAAAAAGAAATGTTGCGCTCAGTCTCTGCGGATCTTTGTGAAAAGCAATGTGAAACTAACAAATGGCACCTTTGAAACT  
GTACTACTATCCCCCGTGTCTCCCTCGAGGGCAGTTCTTTTTCGCGTGGAATACTAAAAATCGAGGTTTCAGAAGATTTTGGTGGATCTTTCTAAAGGAGATCAGTTGAA  
CCTGAGTTCTGAGATCAATCCTCAGCACTGCTTGCACCAATGATGATGATGGATTCATTATGTGGGAATCCAGGGCAATTTGGCATACTGGTCAACTCAGGACAC  
CTGGAAGTTCTTCTACCCACTGACCCCAAGAAACGAGCCTTAGTAGACTCAAGGTTGAGCCTCGGATCTAGCATAATGCATGCGCTCGGAAATATTAATGTAAGTTTTTA  
GAGTTTTTGGAGATTGAGAATTGGATTACGACAACCTAAAGCCATGACGAAGTATGTGCTAAGAAGTGTGATTTTGATAATTAGAAATAATAAATCGTTTACTTTTCAG  
ATTTGTCGTTGTAGCAAGTATCTTTATAGTGCAACTCATGACACTGCTTACTTCTTGAATGGAAGTCTTCTATTTAGAAAT

>PPAI008305\_a (>114 aa; >1 exon) | EDITED (PARTIAL - C-TERMINAL MISSING)

MAPLKLKLYYPCCPRAVLFVAENLKIIEVQKILVDLSKGDQLKPEFLKINPQHCLPTIDDDGFIMWESRAILAYLVNSRAPGSSFYPLDPKRALVDSRLSLDSSIMH  
ALGNII

[ blastx found an odorant receptor gene just downstream of the gene, but no GST. ]

##### PPAI010868 - GSTX #####

>JH660956.1 reverse | PPAI010868 (pre-editing) | PPAI010868 (post-editing)

AGTCTTGGGTGAGGCGTCAACCAACCTTTATCACAAGAAAGTATCACATACCGGTTCCATTCGGTGATTTTTAATTGAAAGTGAGTTGGAGTATTTCTATCTTTAGAAC  
TATCTTGGCGTTTCAAGGTTTGTTTTTTGTGATTTTGGAGTATTTTGTGATTTTTTTCTCCAACACCATACAGTAACATCTCAAAACAATGGCTCCAGTGAAGTT  
GTACCAATTTCCCATCAGTGTCTCCCTCCCGGGAGCCCTTCTGGCCATACGGAACCTTGAATCTCGATGTGGAGCTAGGTTTTGGTGCACAAAATCAAATGTATTTGTGAGT  
AAATTAAGGAGAAATTTGAGAGATTTGCATGTTAGTGAAGTTTTTGGACCGGCAATGAGTGGGTTTACAACCTGGATCAGTGAATGTATCATTATCGGTTGAAAATCA  
AATGATTCGAATTTAGCTGCTTTAATGAAAATACGGTATCTAAATAATTTAAATACGGTTTTAATAGTGTTCACAAGAGTACTTAAAAATATTTTATCAAAGATTGCTA  
ATGTCTTATGCAAACTCTTAGAAATCACTTGTAAACAGGACAAGAAATAATGTATATCAAAATATTTTCTTATATAGTTATATATTATAATCTAATCCGTATTTTTA  
AAAAATTTATCGAAATAAAGAGTTTGGTATCTATCTCTTGGAACTAATAATAATTTATTAATAGTCTTAAACAATAAAAAAACATTAACCATGAATATTGAATTAATA  
AGGCAAAACTATGATCCCAACAAAACCTATACAAAGCCTTCATACAAGCAAAATTTATCGATTATACATATAGACGTTTCTAAAGATTGTCTAAGTGAAGATCTTTTG  
TTGTACAGGTTCAAGGGTAATACGGAAGGAATCTGCTGTTTATCTCTTCGGCAATTCGAAACCTTGAATACATTTATATAAAAAAATTAAGGCATTTTAATTA  
AAAAACCTTTGGATAACATACGATTTTAAATAATAACGTCACGCTGATTTCTCATTCTTACACTGTCCACGGTCAATAGAAGTGAACCTTTGGCTTTTCAGAGTATC  
CCCCTTAAACGACCTTTGCGTCCCTAATATGACCCATATCTCTGCTTCTTCCAAATACGAGATTATTTATATAACAAGTGTGAAATTTGGAAAAATCTTTTG  
GGAAATCAGCTTCGGACGACTCATTTTTTAAATATGTTTTTAAATTTGACCCATTCAATATATTTTAAATAAGGCTGATGCTAAATTTCTCGAAAAATCCATT  
AAGAACATTAGGAAAAAGTTTTACGAAGCTTAAATCATCCGAAGGTACCGCTTTTACCCTTAGTACTTTGTCTTTTATTTCTATGAGATTTTTACCAATCTTTGAA  
GTAAACTAAGAATTGATTCAAATTTGGTTGTATGCCAATAAACAAGTTTTCTTTCGGAACAATGTTTCTAATCTCTGACTAAAAATTTGAGCCGTTTAAAGCTTATG  
TGACCGAAACGTTTTCCATCCTTGTTCATGTGGCAGTAAATAACTAAATTAATAAATTTTAAATAAACAATAAAAACTAGAATAAAGTATCCATGGCTTATGGCCT  
AGACACACTTACGACTTAAACCGAGAGACGGCTTAGTGGAAAAATGATAGAAAACGCGGTTTAAACCATTTTTTAAATATAATTACGCTAAGTCTGCTCTCGGCTAATCC  
TCAAGTCTGTCGAGGCCCTTGCCGGAATATCTAGCTATGCATGAGCATTATAATTTTTCTATTTTAACTTTGGAAAAAACCTTAAAGAAGATATAGGGGAAAGCTTT  
CAGGTTTCGTATAACAATACTTTATGTTTTTTTTCATATCCCTTAATAACCTTACCATTTTTTTCAGGAAATGTNNNNNNNNNNATTTTCGAAAATTAAGAAAAGTGT  
TAATTACATTATAAATAAATAAATTTATAACTTTTCGAAATCTGTTTTACGTAAGCTCAAGATTTTTTTCACATTTGTCATAAGTGTATAGCATCCATAAGTGTAGA  
CTCCACCTACCCACTTTTTATTTTACATTTTTTGTATTTTTGTATAAAAAATTTATGCATTTTTCAACAGTTTTTCGATAAGAAATCTTATTTTGGATAACATAAGG  
AACATAAATATTTGTATCTCAACAAGAAAAAATAAATTTGGAAGTCTGTTGAGTGTGTTTCAAACCTTAAAGTGTGCTAAATGTGTCGCGAAATACCACAGCTTACCCT  
AGCTATTTAAATATATTGCCATAGATACATATTATGTCAGATTCATTAATGAAATATGAGAAGAAATATGGAGTATTCGTTGCCAGAGTGTGTGCGAAGCTTAAAGCC  
TTCTAGTCCAAAATTTTGTGAATTTGTCAACTATAATAATAACAACAACCTTACAATTAACAATTTGTCAATTTAATAGGATTTTTTCAAAAAAGTTTCGAACAGAC  
TTGAAACTTCCAACACTTCGTTTATGATTAATTTTGAATGCAATGTTTAGACAAAAATAGTCGAGCCTTTAAGAATGAATATTGATTAGGAGCAAAATCTTTTAGTTT  
ACTGTGACTAACATTAATTTAATTTATGATCTGGTATTTAATATCTTGGCATCTTCTGTGTTGAGATTAGCATTAAATCTTATTTTCTGGTTAGATCATCGAGG  
TCGACCTTATGAAACAAAGCTCAATTTGTCCTGAGTTCGTCAAAATCAATCTCAACATACCGTTCCCACTCTCGATGACAACGGCTTTGTTGTCTGGGAATCTCGAGCTAT  
TGCTACCTATTTGGTGAATCCAGGGCTCCAGGGAGCTCTTTTACCCGGATGATCCCAAGTCAGGGCAGTTGTGGACTCTCGATTGTAATTTGATGCTTCAAACTTATTC  
CCAAAGGCTCGAACAATTTGTCGTAAGTTTACGGTTTTGGGATTTTGGTATTCGGATTATAGTCAATCTTTTTTGTAGTTTCCTATCTTTTCTGGGAGTCAAGGAAGT  
CAAAGAGGACTTGAACACAGACCTATATCAAGCTCTTGATTTTCATGAATACATCTTGGGAAGGCAAGATTGGTTGCTGGAGACAAGCCAACCTGTCGCTGATTTAGCCCTC  
TTGTCTCTTTCTCAACTATTGTTGTAAGTATAGTACTGTAGATTTCCATCGTAAATTCGTTAGAAGCCTTCGTTAAATTCACAAAAAGCGCTCAATTTATAAAGAATC  
ACGATAAATAAGGAAGACTACAGCGAATTTGAGCAAAATAGCTTCAATTTAACAATGAAAATTTGCAACAAAATTTTTTCGCTGATTGAAAAAGAGCCGATTGAGC  
GAGAGTCTACTGTTTTGAAAAATTTTTGGCAGGGTTAATGTTAATAACTTTGATTTTTCAATAGCATGCTGGAGCAAAATGTGAGCAAGTACTCAAACTTGAATGCTTGGT  
ACAAGCGGTGTGAATCTCTGCCAGGATTCGATGAAAACGAGGGCTGGTGC AAAACCTTTGGAAAAATGGTTAAAAACAATCTTGGCATTACAGGCACATGGGATTAAGACA  
ACGTTGATTTGGATTGGAATCTCTCGTTGCACGTTGTTTTTGTGTGGTTGTTTCACAATTTCTTGAATAAATAAATCGATTAATCGATGAATTTTTGAGTGTGGTTT  
CAATATTATTCGATAAATGATGTTTTAGTAGATTAGTATGTTTAGATGCTGGATAACGTTTTTCGATGCGCTATGGTTTTTCAGGTT

>PPAI010868 (221 aa; 4 exons) | UNCHANGED

MAPVKLYHFPISAPSRGALLAIRNLNLDVEIIEVDLMNKAQLSPEFVKINPQHTVPTLDDNGFVWVESRAIATYLVNSRAPGSSLYPLDPKVRVVDVSRLYFDASNLF  
PKARNIVFPILFLGVKEVKEDLQTLYQALDFMNTFLEGQDWFAGDKPTVADLALLSSFSTIVHAGANVSKYSLNLAWYKRCSLPGFDENEAGAKTFGKMKVTKNLGI  
TGTWD-



ACAAGAGACATTTCAAGAGAATAAAAAGCGTCTTGAGGTGAGCTAAATGCATAATGTCGAGATTTTTTTTCGCTAGGCCCTTACAATTATTTTATTAATTATTATTATTA  
ATTACAAGCTAGGCCCTTACAATTATTTTATTAGATGCACAATGTTTTGTCTATCCAAATTACATAATCTTAAAATTCAGCTTCCCTTTAGAAATATGCGAAAAAATC  
GTACAACAATGTAAACCCACAGCTCAAAGTAGCCCCACCTCCCCCTAACGAATTAATATCCACATGTATTGATTTTGTGCGTATTTTATGGCCTCTACACACTAGAGAA  
ATTTATGTCATATTGAAGAGCTTTTCTATACAGGCGTAGGGAATTTGCTTCAATATGGACATAATTTTGTCTAGTGTGTATAGGCTATTAGAGTTATGTAATAATCA  
TGAAAAATCTTACTAAAGCAAATTAGTCAAAGTGTATTTCTAAGAAGCTTTATGCAAATGTTAGACAATGCAAATATCGAGCTTGGTACAAAAGACTGGAGTCCA  
TTCCAGTTCATCAGAAAACCTCGAAGGTGCAAAAACCTCTGGCACAGTACATAATAACGAAACCCAAATTTAGTTGGGATGATTAATGTTATGATTTCCGGAAAGAA  
AATAAATGATTTTCCAGAACAATGAAAGGGTGGCGATATCTATGATACGGACTACAAATTAATTTCTCATCAATATTATACGATAATAAATATGTAAGTAGTTCAA  
TTGGAGCATATTATGCTTATGAATGGAATGTTGTAAGAAGTTTGTTCATATCGTTATTTCTTAAAGGATATACAAAAAAATGTAATTTTTTTCATGAAACTTGTG  
AGTAATTCAGAACACATTTGAATATTGTGACTAAAAAATGTTGTGACTAAATCCAGAATAATAAATTAATATAAAGCATGTTATTGAGATTAGATCAATATAGAG  
ATCTATCTGGATATTTTACGATTGTATTTTAAACATATTATTCAAAAAGAAATTCGGTTCGACAGAATGTAGCAGGAAATAGACGGAGACAGTGAACCTTTCTTGATTT  
CACAAATTTATTCTACTTTTAAATATCATTCAAATGATAAAGTGTACCTCTACGATGCCATTATCTCACGTTGCAATCCCTTCTAAGGGCCCCAAATAGACTCAGG  
CTGATTCCTCGAGAATATTTAGCCTATTTATAAAAATTTGGCGGCAAAGGATAGGTAAAGGAACTTTATGCAAAGGACCTCTAATCGATGATTCTAAAGCCTCAAATCA  
TTATTTTGATTTATAACCATATTAAGCCGCTCTCGGCTTAAGTCACAAGTGCCTCCAGTACATTAAGCTGGATCTGTCAACTCCATCCCTACTTGTCTAGAATTC  
ATCTTGTAATAAATAATTTGTCACAGACTTAGTTGAAAAAACTAAAACACGGAAGAGATTGAGCAAAAAGCAAAGCAATATTTAGCCAAAAGTAATCTGTG  
TCAAAAATAATACTTTTATTGTGTAGTTTTTGTAGTCCACTCGTAGCTCTACAAAAGTCGTAATTTTGTGTGTATCGAAAATGAAGTTGCGTATAAAAAATTTG  
GAATACCATGTCGATCTCTTGTGATTTGCACTACTCGAATTTGGTATGAGTAAATATATTTCTCATCAATAAAAAAATGTAATTTTATTATCTAATAACGCCCAATTTAG  
AATCAGTATCAGTGCAGCTTTCAAACCTAAGTTAAAGTACTTGGCTTTGTAGATTTTCTGTGAATAATAAATAGTGAAATGGCTCCAATTAAGTTCTATCATCATCT  
ATGAGTCCACCATCGCGTATCGTCTTTTGAATATCAGGAACCTAAATCTAGACGGAACATTGAAGTCGTTGATCTTATGAATAAAGCCCAATTAACCCCTGAATTT  
CTGAAGATGAATCCGCAACATACCGTCCCAACTATTGAGGATAATGGATTGTTTTGTGGGAGTCCCGAGCTATTGCTACGTACTTGGTTTCGGCTAAAGCTCCCGGA  
AGCTCCTGTATCCTTCAGACGTAAGAAGAAGGCCATTTGGGATGCCAGATTGATTTGGAAACAAGCCTTGCAAAATTTCTCACAGTACAATAGCGTAAGATCAGTC  
GTATCACTCCGATTCGTGAGAAAATCATAATTATGTATATTTTATTAACCTTCAGTATCCAATTTTCTGGGAGAGGCTACAACCTATTCCAGATGATAAAAAACAA  
AAGTCTACCAAAATTTGGGGAATTTAAATTCATTTTGGAAAGTCAAAAATATGCTGCCGGTATGAGCTAACCATTTGCTGATTTGGCTCTTTTGGCTACCATCACA  
AGTATCTAGTAAGTGAAGCAATGTTTTATATTTCTCAGATAACATTATCTATGAATTTAATATTAGTAAGTGGCGGAATGTTAGTAAATCAAAAACATTT  
ATGCTTGGTACAAGAGGATGGAGTCTGTTCCAGGTCATCAGGAAAATTAAGAAGCGCAAAGGCTTTAGGAAACTTCTACGATCAAAAAGCTGATATATCAAGCAACT  
GGGATGATTACATGATCAGTGGATATGTTTGTATAATCAATAAAGTTACAGCTGGGTTCCAGAAATTTACAATCTTGAGAGGATATCCAAAGTCCCAATTGA  
TAAATTGATTAGCGCAGAGATTA AAAAGCACAACAAAAGCATTGCTTTAACTGTTTGGTTTCCAAAGTCGTATGAAAAGGTAAGATAAACCATGATGAATAAT

>PPAI010869 (221 aa; 3 exons) | UNCHANGED  
MAPLKYHFVSPSRIAVLVVRNLHLDVEIITVDLMNRQLTPEFLKINPQHTVPTIEDNGFILWESRAIASYLVSAKAPGSSLYPTDPKKRAIVDARLYLDQALQL  
ALTAIVFPIHAHGATTIEKDKKDKAYQILENLNFMEGKPYAAGNELTIADLALLATITSFYEMGANIPKFNITSWYKRLESIPGFKENEGAKALGEYVSKVTVT  
GTWDD-

>PPAI010870\_a (219 aa; 3 exons) | EDITED  
MAPIKFYHNFLSGPSRGLVLTIRSLNLDVEIETLDDLKQAQLAPEFVKINPQHTVPTIDDNGFVLWESRAIVSYLVSAKAPGSSLYPTDVKKRALVDARLYLDQSLQL  
VMSSAVYVIFTGEATKIPVDKKQKLFQILEHFNFTFLEGGKYAAGDELTVADLALLGTISTLYELGANVSKYTNIDAWYKRLESIPGHHENLEGAKALAQYIITKPNFS  
WDD-

>PPAI010870\_b (221 aa; 3 exons) | EDITED  
MTFFKFYHHPMSPPSRLVFLTIKLNLDANIEVLDLNFKAQLSPEFVKKNPQHTVPTIEDNGFILWESRAIASYLVSAKAPGSSLYPTDPKKKAIVDARLYLDQALQL  
ALSAIVFPIHTQGATTIEKDKKDKAYQILENLNFMEGKPYAAGNELTIADLALLATISSLYEMGANIPKFNIMSWYKLESIPGFKENEGAKGLGDYVSKSVSIT  
GTWDD-

>PPAI010870\_c (221 aa; 3 exons) | EDITED [GENE JUST DOWNSTREAM OF PPAI010870]  
MAPIKFYHHPMSPPSRIVLLTIRNLNLDANIEVVDLMNKAQLNPEFLKMNQHTVPTIEDNGFVLWESRAIATYLVSAKAPGSSLYPSDVKKKAIVDARLYLEQALQI  
SHSTIAYPIFLGEATTPDDKKQKVYQILGNLNSFLEGGKYAAGDELTIADLALLATITSYELGANVSKFNIAWYKRMESVPGHQENYEGAKALGNFLRSKADIS  
SNWDD-

##### PPAI010871 - GSTX #####

>JH660956.1 forward | PPAI010871 (pre-editing) | PPAI010871\_a, PPAI010871\_b, PPAI010871\_c, PPAI010871\_d,  
PPAI010871\_e (post-editing)  
GTTAACCCAAACATTTCCATATTTGGACAAAACTCCAATGCGTTTTCCAGAAATGTTTCCACACAGATAGTAGAAAAAGTGAGTCTCAATGATAAGAAAAATGTGT  
ATATAAGTGTCTGCACCTCAATAACGCCACTTAGTATTGAAC TACCAACAGGTGAAATTTGCTTTGTGAAAATCTTGAATAAACA AAAACATGGCCCAATTAACCT  
TTACTATTTTAACTTCTAGTCTCCATCACGTTAGCTTTATTAACTATTAGGAACCTGAAAATGGATGTGGAATAAATGTTATCGACACCAATGAAAAAGGAGCAAAATGACT  
CCTGAATTCATGAAAAATTAACCTCAACATACAGTGCACACCTTGACGCAATGGAATTTATTTTGTGGGAGTCTCGTCAATTCGATCGTATTTAGTTGGCCCAAGGCC  
CTGGAAGCTCACTATATCTTCAAACATAAAGAAGAAGCCATTGTTGATGCTAGACTATTTTGGATCAAGAATTACTGAAATGACAGCTGTACCCGTTATGTAAGTTTATA  
AATTTGGAAGAAATATTTCCAGAAAACTAACACTCCAATATTTTATGATTCATTTTCCACAGAAATTAACCATAGCCGATCTCGCAATTTGGCCATATCGCCACCCCTCA  
CACTGAATTTTAACTATTACAATCTGTCTATAACCGTTTTCTTTTCCAGCAATTTGGTCAAAAATTTGGAACAAATCTAAAACCAATGATGACCTTTAAAGGAACCTTGGGATGATTA  
AACTATTCCTGGTTTACCAGGAGAACCTCGAAGGTGCAAAAATTTGGAACAAATCTAAAACCAATGATGACCTTTAAAGGAACCTTGGGATGATTA  
ACTTCCATGAT  
TTTGTGTTATTTTAAACAAAATAAATGACGTTGCAAAAGTTCATATTGAAATCTTTTATAAATTCATCAACGCTAAATATCTCAGCTAAATATCTCAGCTAAATCATTTGAAACAGAGC  
AGTTGTTTCTGGAACATATAGTAAGATCCACTGCGACTTTTTAATTAATTTTAGACTAGACGGGAACTTTATGCTCTCAATCTTCCGGTGTTCGTCAGAAGGGTAT  
TCCTCTTTTCAAATTAAGAATCTGTTTTTCTCCAAAGCTTTCAACCCCTGGTATGGGATTTCTCAGTGGGTCAATTTAGAGACTTTTAAATATTTGAAATATTT  
AAATATTTGAAATAAATATGATATTTTCTCCAAAGCTTTCAACCCCTGGTATGGGCTTCTCAGTGGGTCAATTTAGAGATTTTAAATATTTGAAATATTTGAAAT  
ATTTTCAAATATTTAAAGTCTCTAAATGACCCACTGAAGAAGACCCATACCAAGGGTTGAAAGCTTTGGAGAAAAACATATCTTTTAAATTTGAAAGAGGAATA  
CCCTTCTGACGAACACCGGAAGAATGAGAATATAGACTAGACTTAGGGATGCTTGTCCATTGAAGAAATGGTCGTCATGGTCTGCAATAGTCTCATAGTTCGA  
ATGAGTTTGAATAAAAAATCAGTGTTCAGAAATAAAAAAATGATCAGTGGTGCACCCAGTTTCACTTATAATTTTCTTTTATTCTATAAAATCGTTTTAGTAGTT



AATATATTTCCATCACAACTATAATAAATTACCACAAAACATAAAAATATGGCAAATGAAATCCATGTTAAGAAATTTAAAAAATTAATCAGGGAAATACATGTAA  
GCTAGAATTCTGTATTATGGGCGGTCGCAACTCAATGTAAAAATCGTACATATAGTCTTAAGAAAGGATCGTTGGATCCAAAAGGCAGGAAATAAACTGAAATCTAAT  
CTAATCTAAAAATTTGTTTCGTAATGTTTGTGAAATCCTATGGCAGACTTACGAAATGCTCGTGAATTGTATAACCCACAAAATAAGTTCGTAATAATTTTGTACTTTTT  
CACAAACATTGTTTCGTAATGATCATTTGACGAACATTTTTTGTACTTTTACAAACATTTGTTTCGTAATGTTTCGTAACATACAAAAATGTTTCGTAATAATTTTGT  
CATTGTTTCGTAATTTGTATGTAATTTTTTCCAGACAAAACAAAAATTATTACGTTATATTACAGTGAATGCTTTTTCTAGACATTTAGATCTTTGCATCGGGCGG  
AGCTCGAACTACAATACTGTGAGTTAAGCCGGGATTTATCCACCAAGAACAACAATCTGCCATTGCACCCTGAGATCCCTACAATTACCTAAACCGAAA  
ATTAAGTCATACGTAAGTTGTAAGATTCTACACATATTGTCCATTGAACTAGTTAATTTAAGAAGACTCGAGAATAATTGAGCTTAAATTAACCTAAAATTAC  
TCGAAGTTATAACATGGATTTCGAGCAAAACAGTGGTATCTAACTGCTATTTTCATTCTCCAATACTTCTGCATTTGGATATCTACAGATAGACCAACAAAACAA  
GTCATTTCTATTGATAGAAAAAATTTGTGTATATAAAAACACAAATCACCAGCACCATCAGTTTCATTTCAGACTGTTAAAAGGTGAACTTGTGCTTCGTCAATTCATA  
AGATTCAATTAAGCTACGAAATGGCTCCAGTAAAATTATACTATTTCCCTTGGAGTCTCCATCACGTGCGAGTGTATCTAACAGTTCAAAAATCTAAAATTTGGATGTGAAAA  
GACTGTTATCGACACTACGAAAAGGAGCAGTTGGCTCCAGAGTTTGTAAAGATCAATCCTCAGCATACAGTCCCAACCATTGATGACAATGGATTTATTTCTCTGGGAGTCT  
CGTGCTATTGTTTCGTATTAGTATCGGCAAAAGCTCCCGGAAGCTCACTGTATCTTCCGACATAAAGAAGAGGCCATTGTGGATGCGGAGACTATTTCTGGATCAAGATT  
TATGGGCTGCAACCTCGGCTATCATGTACGATTTGTACAAAATTATTATTGATAAAGTATTTACTACAATATTTCTAATTTTTAGTTGTGCGATCTACGCTCAAGGAGCT  
ACCACAGTTGCTGAGGATAAGAAGGAAAAAGTCTACAAGATCCTTGGGAATCTGAATACATTTATGGAAGGACAGAATTATGTTGCCGTAACGATTTAACAGTAGCCGATC  
TGGCGCTTTTGGCCAAATCTCCACTCTACGTGAGTCAATGAAATTTAATCATTTTTGGGTAGTCTTATCAGTGTTTTTATTTTTAGGAAATTTGGAGCTGATGTTAAC  
AAATTCAAAAACATTTGCTGCTTGGTACAAGAGGCTGGAGACAATTTCTGGTTACCAGGAGAATCTAGAGGGTCCAAAGGCATTTGAAACTTCCTCAAAGCAAAAATGAC  
TCTCAAAGGAACCTGGGATGATTAATTCACCACCTAATTTTTTTTTGGAAAAATAATAAAGTAGTTGCTTCTTTGAAATCGAATCATATCAGTCTGGTGATAAGAAT  
TCAATGTTTAGGGTAAGTGTACCAAAATTCGGCCAGCTTGCAATTTCCGCCACCTTTTTTGTTCCTCGAATTTCCATGAACTTTTAGATTTTACGTACTCTAGAGATT  
ATGCAATGCAAAAAGAATAACAAAAAATGTAGCTTCGACAAACGAGATGACGTGAAAAAGACATTGGAAGAATTCGGAAGGGCTAGGAATGAGAATGAAGGTGG  
CCGAAATAGGGTACCAAGCTATGCTATGTTTTTGTTCATTTAAAAATATTAAGAATGATTTAGAGTAAATAAAAAACGGTAAACTCTTACAAGGTTCCAAGCA  
ACACTCTTAAAGAAGAAGAATAAAAAAATCAATTTGTATTTAAAAATATTACATTTCAAACCTTGAGACTTTGACGCTTGCACTGCAACTATGCCGAAATTTGGCACACT  
TACCCTACCCTTCTAAAAATGGAATAAATCAAAAAATCATTGTATAATACTGCAACTTCAGGTGCTTTAGCACTATCTTTTGATATTCTGTATCTAGTGTTCCTTA  
GATTTTGATAAGATTGGAACAATTCAGCCCTGCAATGGCTCTTATTAATATACTATTTATCCAGAAGGAGCTCTTAATCGCGCAGCTCTTTTGACAATACGGAATT  
AGAATCTTGAAGCAGAATTGATCGTAGTGGATTTACGAAAAAGAACAATCAACAGAGAAGTTTATTAAGATGAATCCGCAATGTTGATGCCCCGTTTTGGATGACAA  
TGGATTCATTTTGGGAAATCTAGGGCTATATCTCAATATTTGGTCACTCTAGAGCTCCTAGGATTCACCTATCCAACCTGATCCTAAAATGAGAGCTGTAGTAGA  
TGCTAGATTATTTCTGGATACAACCTTTCATGCTGTTTCAAGATCCTTCTTCGTAAGTTGGAATTTGAATTTGAGGATTATTGATAGACCTAAAATTAACCGCTTT  
TTTTCAGTATCCTATACATTTCTTTAGGGGAAAAGCAATCCGAGAATACGAAAAATAGAGGCTTTATCAATTCGTAGTTTACCTGGACAATATAATGGAAGGTCAAAG  
TATGTTGCGAGAGATGAATTAACCATCGCCGACTTTTTAATTTTGGCATCTTTTTCGACTTACTTTGTAAGTTTACAAGTTTAAAGTATTGCAAAAATCGTAAAAATACGT  
CTAATTAATCTTTCTAGCATGACAGGCAAAATGTAAGCAGTTTGAATAAATCTAATGCTTGGTACAAGAGATGTGAAAGTCTTATCGGTTTCCAAGAAAACGAAGATGAAG  
CAAAGCTTTCCGAGAATGTTAAAATCTAATTTAGGTATTAATAAATACTTGGATGAGTTGCAATAAAGCATTGAAAAGAAATCAACTTTTTTATTAGTGAGTTAC  
ATAATCATGACCTTGAAGAAATTTGATACATAAAATTAATTTTCACTTTTACATTTTACATCTTATCAAAATTAGATTAGACAATTAACGTATAAAAACGCTACACTTA  
AATTCATTTGAAAAAATAATTATAATGCAAGAATTAGTCAAGTTTAAATCC

>PPAI010871\_a (221 aa; 3 exons) | EDITED  
MAPIKLYFNLSPSRLALLTIRNLKLDVEIIVIDTMKKEQMTPEFMKINPQHTVPTLDDNGFILWESRAIASYLVAAPGSSLYPSNIKKKAIVDARFLDQLELLN  
AAVPMYSIFAQETPEAAQKKEKVKYKILGNLNTFMGQKYVAGNELTIADLALLANIATLYQIGANVNKFNIAAWYKRLETIPGYQENLEGAKIVGQNLKPMMTFK  
GTWDD-

>PPAI010871\_b (221 aa; 3 exons) | EDITED  
MAPIKFYHFNISPPSRLPMLTIRNLNLDVEIIVIDTMKKEQMSPEFMKINPQHTIPTIDDNGFILWESRAIASYLVSAKAPGSSLYPSDIKKRAIVDARFLDQEMQN  
ATLPVMHAIYNQEPKDFVIFSKTEKLYKILENLNTFMGQKYVAGNELTIADLAFLANISTLYEIGANINKFNIAAWFKRLENIIPGYQENLDGAKVIGDTRFKPMFTK  
GTWDD-

>PPAI010871\_c (221 aa; 3 exons) | EDITED  
MAPVKLYFNVSPSRIALLTIRNLKLDVEIINTMKNEQMSPEFMKINPQHTIPTIDDNGFILWESRAIASYLVAAPGSSLYPSDIKKKAIVDARFLDQDLFH  
ASEEAMYPIYEQKATTVAEKKEKLYKILGNLNTFMGQKYVAGNELTIADLALLVNIISTLYEIGANVNKFNIAAWYKRLESIPGYQENLEGAKIIGQILKPMNLK  
GTWDD-

>PPAI010871\_d (221 aa; 3 exons) | EDITED  
MAPVKLYFPLSPSRAVYLVQNLKLDVEKTVIDTTKKEQLAPEFVKINPQHTVPTIDDNGFILWESRAIVSYLVSAKAPGSSLYPSDIKKKAIVDARFLDQDLWA  
ATSAILLSIYAQGATTVAEDKKEKLYKILGNLNTFMGQNYVAGNLDLTVADLALLANIISTLYEIGADVNKFNIAAWYKRLETIPGYQENLEGAKIGNFLKAKMTLK  
GTWDD-

[ The cyan highlighted region indicates the start to the end of an additional gene (PPAI010871\_e), but no complete gene model could be reconstructed. ]

##### PPAI010872 - GSTX #####  
>JH660956.1 reverse | PPAI010872 (pre-editing) | PPAI010872 (post-editing)  
GCCCGCGGTTACCGAGTACACTGGCAATGGATCCGACTCTGTACTCCAAAATATCTCAGCTCAAATTTCTGTAGTAGTGAAGGCAAGTTAAGTATAGAA  
AGTCAGTCTGATAAGTGTCTTACTCGAAGGTAGCGGAAACTCTCAATTTCTCCAGTAAAATCTAATGGAATAATTTCCACTAATTTCTAGAAATGGCCCCCTAAAGTT  
CTACTACTTCCCTCGGAGTCCCCCATCTCGGGGAGCTCTCTTGGCGAATTCGCTATCTGAAGCTGGATGTAGAGATGATCAGTTTGAACCTGCGTGAGAAGGAACAATTAAG  
CCAGAGTTCCATAAAGTCAATCCTACTCACAGTGTTCCTACTCTGGATGACAATGCTTTCGCTCTGTGGGAGTCTAGAGCTATATCTCAGTATTTGCTCGCTACTAGGGCTC  
CTGGAAGTTCTCTGTATCCAGATGATCCCAAGAAGAGAGCTATAGTAGATGCCAGATTTGTATCTGGATGCTTACGTTTACGGCAACTGCAAGGCTCATCTTTGTGAGTTCTT  
TTATGAGTTTTCTAATGGAATTTGGTGTATGATCCCTTTAATGATCATTTTCAGTATTGCAATTCATACTTTGGGAGAAAAGACTATCGCTCATGATAAGAAGTTGCGTCTC  
TATCAATTTGCTGGATAGTATGGAGACAATTTGAAGGACAGAAATACGTTGCAAGGAGATGAGATTAGTCTAGCTGATCTTGTCTTTCTGGCTTCTTCTACCTTTTAA  
TAAGCTAAATAAATTTTTCTACTAGCGGTTTCTTATCAACATCGTTTGTTTTCAGTACGCTGGGGCCAAATGTTGAGAAATACAAAACATTCAGCTGGTACAAAAGAT

CGAAAAATGTTCTGCTATCAGGAGAATGATCAAGCTGCTAGAGCTTATGGAGATTTCCTTAAGGGTCTGTTGGGAATTAACCTGGAACCTGGGATTAA AACTGACTAATTC  
TGCATTATAATTAATTTTTTTTCAAATGAATTTAAGTGTAGCGTTTTTATCAGTTAATTGCTAATCTAATTTGATAAGAGATGTGAAAATGAAAGTGAAAAGTAATTTT  
GATGTACAATTTCTTCAAGGTCATGATTATGTAACCTCACTAATAAAAAAGTTGATTTCTTTTCAAATGCTTTTTATTGC

>PFAI010872 (220 aa; 3 exons) | UNCHANGED  
MAPLKFFYFPASPPCRALLAIRYLKLDVEMISLNREKEQLKPEFLKVNPHSVPTLDDNGFVLWESRAISQYLVATRAPGSSLYPDDPKKRAIVDARLYLDAYVQA  
TARLIFYCIHTLGEKTIADHDKLRLYLQLDLSMETIMEGQKYVAGDEISLADLAFSLASFTLLYAGANVEKYKNIQAWYKRCENVPGYQENDQARAYGDFLKGLLGIT  
GTWD-

##### LLOJ001842 - GSTX #####  
>JH690728 reverse | LLOJ001842 (pre-editing) | LLOJ001842\_a, LLOJ001842\_b, LLOJ001842\_c, LLOJ001842\_d,  
LLOJ001842\_e, LLOJ001842\_f, LLOJ001842\_g (post-editing)  
TATTAAGAATGAATTTGAAGCTTTAAACTTCAAACTTTTGGAGTCATATTGGTTATTTTGTCAAGCCAAGAGTACAGGGCTAAAAGAGAAAGTTTCAATGATTGG  
CCCTAAGGCCAAAGTGTCAATACAGGTTCCCTCTCTAAATTCATAGTGATTTTTTTTTTATACTTCTCTATCACTAATTTAATCAGCAACATGGCCCCAGTGAAGTT  
CTACCATTTACCATTAGGCCCCCCATCTCGTGGGGTTCTTTTACCATTTCGGAAATTTGAACCTCGATGTTGAGTAAGATTTTTGTAAATTTATTTAATAAAAAATATTC  
CCAATAAATTAATTTTGCATATCATTTTTAGATTATTGAGGTTGACATCTTCAAAGGGGAGCATTAAACCCCTGAATATTGGAGATGAATCCTCAGCACACCATTCCAG  
CTCTCAACGATAATGGCCTTTACTTGGGGGAGTCCAAGCCATTTCCACTTATTGGTTAATTCAAAAGCCCCGGAAATCCGCTCTACCCAACGTCCAGCTGTACGAGC  
TCAGGTGGATGCAAACTCTACTTTGATGCTGCCACAATATTTCCACGAATGAGAGCAATCTTTGTGAGTCTTAAAAAAAAGGAAATTTAAAGATTTTCATTGTTAAT  
TTATGATTTTATTGTTTTCAGTTCCTCTATCTTTCTCTCGAATTCGAAACCATTGAAAAGGAGAAGAAGGAAGCTTTCTATCAGGCCCTTGATTTTATGAATACCTTCTT  
GGAGGGCCGACGTGGTTTGTGTCAGATCATCCACACTCGCTGATTTGGCTCTCTTTGGCTCTTTTTTCAACATTTGTCGTGAGTTTTATGAATTTAAGTTGAGGAATTT  
ATTAAGAATTTGTTAAAAATTAATTAATAAATTTTCAGTATTGTTGGAGCAGATGTTTTGAAAGTATACAAACCCCTAGCTTGGTACAACAGATGTAATCCTTGCCTGGAT  
TTGAGGAGAATGAAGAGATGGCTAAAAAACTAGGAGGACTTTGTAAGGAGAAGCTCGGCATTACTGTTTATTGGGAATAATTTTATGTTTTCTTTTACAAATTCATTCAT  
ATTTGAGATAAATTCATTATCATTCCAAACATCACAATAAAAAAGTGTTTTGGAAAAACAGACTGGGTTTGTCTTAAATATTCGTTTTTTCGTTGCAGCTGTATATAAA  
AATCCTGTTTCAATAAATTTATTTCTTACGCTTAATACCTACCTTCTAAACAGACCGCAATGGCCCTCTGAAGTCTTACCATTTTACTCTTGGTTCTCCCTCTCGTGGT  
GTCCTTTTACCATCCGGAATTTAAATCTCGATGTTGAGTAAGATTTCTGTTTTTCAATATTGATTAACATTTAATAATAATTACATGTTTTTACAACATAGATAAT  
CGAAGTGGATACCGTGAAGGGCGAGCAATGAACCCCTGACTTTGTAAGATTAACCCCGAGCATTCTCCCAATCGATGACAATGGCTTTGTTCTGTGGGAATCTAAA  
GCCATTTCCAGTATTTGGCCAACTCAAAGCCCTGGAAATCCTCTCTATCCAACCTGATCCAAAATCCGAGCTCTTGTGGATTCTCGCATGCAATTTGATTGCGATAGTT  
TATATCCAAAATCAGAGATAATTTGTAAGACAATTTTGAATTTTTTGAATAGAGAATTAATTTTAAAGCTTAATTTCTTGCAGTTTCTCTGTCTCGTAAGTGGC  
GTAAGAAAGATTGAGGAAGAGAAGAAACAAGCAATTTATCAGACATTAAGTTTGAATGAAATCTTCTTGAAGGACCTCAATGGTTTGTGTCAGATCATCCACACTC  
GCTGATTTGGCTATTTGGCATCATTTNNNNNNNNNNNNNNNNNNNNNNNNNNNNNNNNNNNNNNNNNNNNNNNNNNNNNNNNNNNNNNNNNNNNNNNNNNNNNNNNNNNN  
AATGCGGTCAATTGTGCAATGGAGGGGGCT  
GGCTTGCAGAGTGTACAGCCATTAGTCTGGGAAGCGACGCAAAGCATTTGGATCATCTGTGAGGGCTTGGGCGGTTTGTGTGATTGTTATGGCGTGTCTGGT  
AGTTTGACCAATTTGATGTGCAATCTTCGTTTTATAGTATAACGGTGTGATTTGCTGAAGTGAGTTGTTATTTTATGCGCTTTTTGAATGTTTTTCCAGATTT  
ATGTCATATGTTGGTACTAAGATGTACATATTTGTTGTAGAGCCTGATGATGTTTAAAATAACCGAAACGTGCTGAAAGCGTGAAGACGTGCGTTTTTATTGA  
CTGCTCCGATCAAAAACATAACTTAAAAACAGTCTGTTAAATCTCAATAGAGAATTAATGTTTATGCTTAATTTCTGTCAGTTTCCCGTCTCGTAAAGTG  
GCGTAAGAAAAATTGAGGAAGAGAAGAAACAAGCAATTTATCAGACATTAAGTTTGAATGAAATCTTCTTGAAGGACGTCATGGTTTGTGTCAGATCATCCACACT  
TCGCTGATTTGGCTATTTTGGCATCATCTCAACTTTTGTGTAATTTGAAACCTTCTTGTGGAGAAGAAACAAGATTAATTTCTGGATGATTTATTTTTCAGCA  
TTTCCGAGCTGATGTTTTCAAAGTACAAGAACATCTTGGCGTGTACAACAGATGTAATCCCTTCCAGGATTTTCTGAGAATGAAGAAGGTGCTAAAGAGTACCCGAGATG  
GTTAAAGAAAATCTCGGAATTTCCGGAAATATGATTTCACTCGCGAATGTAATCTTGTGTTGAAAATTTGTTAAAAACATTTCAATAAACATTAATAAATTCATTAATATT  
TCTTTTTATTTCAATCAAACTTTGTTGATTGTCAGACTAATTTTTTATATAAAAAATTCGATGATTTATGTCTCTAACGGTCATAACAGTCATTAAGTTAATAACCA  
TGACATTACATAATTCACAAAACAGCATTTTCCATAAATAGACTGTCTTATCGATTTGTTTTAGTTTTTTTCTAAGAGTCTTTTTTGAAGTGTTTTTAGATAATAAA  
GGGTTATCAGAGCGGAATTCCTTACGATATATCAAGTTGAATGAGAAGTTAACTTCTCCCCACATCATTAGTCTCGAGGAAAGCTCAAGCGAGAGTGAAC  
TCTGCATAAATAATTTTAAATTCGGCGTTCGTGAATTAAGTTAGTTGGGTGTTAAGTCTTAAATAATTTTCAATTAATCTTTTATATGCAGATAATGTAATTT  
TGTAATTAATAATTTATTTTACAGCTTCGATTTTGTAAATTTCTTGCAATTTTCTCAATTTCTTCTCTAAAATCTTTTATAATTTATTTCCCTAACACTT  
CTTGCTTTTTCTCAATTTCCGATACTTTAGGAAATCCAACACAATGGCTCTTTGAAGTTGACTTTTTGGAAATTTGGTCTCCATCTCGTGGAGCTCTTCTTACTATC  
CGAAATTTGGGTCTCGATGTTGAGTAATGAATAAATCAACTAAAATAATTAATTTAAATTAATAAAAAATAAATTTCTTCTGATGATCATCCAGCTCGATCTTTTCACTGG  
CGAACATCTAACCCCTGAATTTTGAAGATGAATCTTCAGCATACGGTTCCAACCTCTCGATGACAATGGCTCTTCTTGGGTGAATCAAAGGCCATTTCCACCTATTTGGTG  
AACTCCAGATCCCCGGAAATCCTCTCTATCCAACCTGATCCAAAAGTTGGTCTCTCGTGGATGCTCGTTGTAATTTCCGATACAGCCACTGTCTTCAACAGGATCAGGAATA  
TCAGCGTTAGATGAATTTGCTCAGCATTGCCAGGAAGACATTTCTAAGAAATTTATTTTTTGTAGTATCTCTTCTTGGAAAGAAATGTTTGTGGATGAAGAGAAG  
AAGAAAGCTCTCTATGATGCTCGATCTCATGGAATCTTCCCTGAGGGACAAAATGTTTGTGCTGATCATCCCACTCTGCTGATTTAGCTCTATTTGGTACCGGTTT  
CGTCCCTCTCGGTAATTTTGAATCTTTAGACTTTTGAAGAAATGATTAACCTCGGTGATTTTGTGTCAGTACTTTGGATTGAAATGTTCCCGAAATACAAGA  
ACATTAAGCCCTGGTACAAACGTTGTGAAATCCCTTCCAGGATCTCTGAGAAGCGGAAGGACTAAGAAATACGGAGCTCTTGTTCAGAGAAAGCTTTGGCAAGGGCTT  
CTCATGGGATTAAGAATACCTTTGAATCTTAAAGCTCTAAAATTTGACTTTATTGCTTTCTTGGATTGAAATTAATAAATTTAAAAATTTAAAAATCTTTTTTCT  
TAAGAAGTTAAATTAACCTGAAATTTAACGACGATTCTATTACCCTGTTATCTTGTATATAAAAACGACACAGCCAAAAAATATTAGATAAATAATTCATAAAT  
TTCTTTAATCAACTTTGCGTCAATTTGATTTTCTAATCTCTCCAGTGACATAACACATTTTACTTATCTTTGCTTTGTTGTAAGAAACTTTAACAAACTTTGAAC  
GAGTGACATGCGTGTGGGTATCTTTTGGGAGATTTTTTGGGATTGATTGCGTTATTTCTGTCTCACTTCTATTTCAATTTTAAACATCTTACGAAAGTTTTCTT  
ATTTATTCAGTTTTGACTGAGGCGTGAACGAGAAGGTGCTGCTGTTCTAATTTCTGTTCAAATTTCTGTTAAATTTCTGTTGAGATTGAAAGTGAAGGTTTTCTT  
TTGGCTTTAAAAATAAATTTTCCAACTTCTGGGTTGAGAAGTTTATATCTCAATCTTAAACATTTTCAATCTAATTTCTTAAATTTCTTTAACTT  
CAATAAATTTTCAATAAATTTCTGTGAATTCATTTTTTTTATTTTCCACATAGCTTTGAACCAACACAAATGGCTCCACTGAAGTTGTACTACATCGAATTAGGACCT

CCATCCCGTGCCTCTCTGACCATTGCAACTGAAGCTCGACGCAGAGGTAAGTAACGAATTTTCAATTCTCTTGACGATTTAATGAAAAGAAATTTTCATTGAAA  
GATCATCAATGTCGATTAATCAATGGAGCTCATAGGACCCAGAGTACCTCAAGATGAATCCTCAGCACACAGTTCCAACCTCTCGATGACAATGGCTTCTACTTGGCTGAC  
TCCAAGCAATGTCAACGATTTGGTGAACCTCAAGATCACCCGGAAATCCTCTCTATCCAACCTGATCCGAAAGCTCGTGCTCTGTGTGATGATCGTTTGTACTTTGATGGAG  
CTACTGTTTTCCAGAAATTAAGACAATCAGCGTATGTTTTACAGCAACAATTTTCTAATAAATTTGAGAGTAATCTTTGTTTTATTTTTTTTGGCAGTATTCGGTCTCG  
GTTCTTGGCGTGAATAATGTGGATGATGAGAAGAAGAAAGCTCTGTATGAAGCTCTTGATTTTATGGAGATTACTTGGGAAGGACAGAAAGTGGTTGCGAGGTGATCATGCTA  
CCCTTGTGACTTGGCTCTTCTGGCTACATATTCCTCTCTGGTGTAAGGATAAAAATTTTTCTAGAAAATATTCACCTTCTTAGTAAATAATTACTTAAATTTTTGAT  
ATTTTTTGCAGCATTTTGGATTGAATGTCTCCAAGTACAAGAACCTTCAAGCTTGGTACAAGCGCTGTGAGGCTTTGCCAGGATTTGCTGAAAATGAAGAAGGTGCTAAG  
AAGTACGGGGCAATGATGAAGGAAAAGCTTGGAAAGAAATTTCTCTTGGGATGTATAGAAATTTTCTCAGAGTTTGTCTTGTATTTCTTGTAAATGAAAGATTGAATA  
AAAATCAATGAATGAATCAATGGATTAATGAAATGTAGAATGGCGTATTCTATCTTTGAGCTCCTCTATCGCGCATTTTAAATACGTGAACAGATAGAGGTTT  
AGCAGATGAATCATCGATATCTATAGTTTTTTTCTTAAATTTTGGGAACTCATTTTAAATAAATACTGCCTTAGAGACTTATCAAATGTCTGCCAATCATCTTTA  
CAAATAATTTTCATTAATATTTTTTTAGAGAATTTCTTAATCATTTGTTTTGGATGAAAGGGTCATCTTCGAGAGAGATTTTCTACTCTAGAAAAAATATATGTTT  
TTTTGGCTACACACTAATCTACTTCCAAGACTAAAACGTTCTATCTCAATGATATGTACCATAATTTAGATTTTTCTGCAAAAGAGCTTTTCCAGAGTACTTTAGC  
AAATGATATGTCTTATCATTGAATTTGATCTCAATGACGTTTATATGTGTGCCTCATTTTTTATTTACATATATTTGGTATATATTTCTTTTTATAATCAA  
TTTAGCTTAAGTCAATCTCAGCGAAGACAGTGTCTATTAATACTCTGCAATTTAGTGTAAAGAATTTAAATTTAAATTTAAATTTAAATTTAAATTTAAATTTAA  
TTTTTTTTAATTTGTTTTTAAATCTGGATAAACAGACCAAAATGGCCCCACTGAAATTTACCACATGCCCAGGACCTTCCCGTGCAGTTGACCTTAACGATTGGA  
AATCTCAAAATTAGATGTTGAAATAAGAATTAACGTTTTAACCTTAATTTAATTTAATAAATTTTAAACAAAATAATTTCTAGAAAATTTGAAGTTGATGTTAAATGG  
CGAACAAATGCTCCGGAATTTGTAAAATTAACCTTCAACACACTGTTCCACAAATGATGATAATGGATTCAATTTGTGGGAATCTCGAGCTATTTAGACGTTATTTGGTT  
AACTCCAAAGTTCCTGAAATTTCTCTCTATCCAACCTGATCCCATATCCGAGCTTTAATAGATGCTCGTTTATATTTTGATACCTCAACTCTATATGCAGCCAGGGAGATCA  
TGTAAATCTTTACTTTTTAAATTTTTCTCAATTAATCTGTATTTTTTCTTCTTTGTTTTTTTTCAGTTTCTTATTCTTTTCTTGGTGCAGCAACATTAATAAGAGAA  
GAAAGAAGTTTCTATCAAGCTCTTGATTTTATCAACACTTTCTTAGAGGGCCGCAACGCTGTTTCTGGAGATCATCCACACTCGCTGATTTATCAATTTTGGCTCTTTT  
TCACTTTTGTGTGAAGATAGAAAATTACTGATTTTTTTTTCTAAAATGCATAAAAACCGATAAATCTTTATCCAACCTAACCTTTTACATTTTAAATTAATTTTCAGTACG  
CTGGAGCTAACGTTAGCAAGTACAAAACATCTAGCTTGGTACAAGCGGTGTAATCTCTGCCAGGATTCGATGAGAACGAAAGTGGAGCCAAAGGATTCCGGAAACGTAG  
TCAAGGAAAAACTCAGCATTACTGGCACATGGGATTAAACGCGATTGAATCTCCGAAAGAGAGATTTCTCTAAAAGTTAAAGCCTCTTTAATCTGTATGAAGTCT  
GAGTATTGAGTCTTATCTTAATGACACCACAATTTTAGATTTTCAGCAAAAGAGCTTTTCCAGAGCACTTCAGTGGATGATATGGTGTATCATTGAATTAATTTTCA  
TCTCAATGGACGTTATATTTCTGTCTCACTTACATTTCTATTTTAGTAAAACATTTTTCCAGGTCATCATTTAGTCTTGAGTCAAATCTCAACGAAGACAGTGTAC  
TTCTGCAATGAAAGTGTGGGTTGAAGATTAATTTCTAAGAGTGAAGGTCAATTTTATTAACATTTGTTTAGTGTAGTGTATTTTGTGTTGATTTAAAAAATAAGAATT  
CCCATAAACTTATTTGGAATTAATTTTCTAATCTACCAAATTAGTTAGAATGGCCCCGTAAAATCTATCATATGCCAAAAGGAGCTCCATCCCGTGCAGTTGCCCTTA  
CCATTGCAAACTCAAACCTCGATGTTGAAATAAGAATGTAATATTGAACCGTAATTTAATTTAAGAAATTAATTAATTTCTTAAATTTCTTAAATTTCTTAAATTTCTTAA  
TTAAATGGCGAGCAATGTCTCCGGAATTTGTAAAATTAACCTTCAACACACTGTTCCACAAATAGACGACAAATGGATTTATTTTGTGGGAATCAGCAGCTATTTACTT  
ATTTGGTTAATCTCAAAGCTCTCGAAATTTCTCTATCCAACCTGATACCCAGCTCCGAGCTACAATAGATGCTCGTTTATATTTTGTAGCTCAACTTTGTATGCTAGAGC  
GAGGGAATCATGTAAGACCATTAAAGCTTTTCTAATGAATCTTTTTTTTAAATTAATAAATTAATAAATTAATAAATTAATAAATTAATAAATTTCTTAAATTTCTTAA  
TATTCTTTTCTTGGCGTTAAGACGGTGGATGAGGATAAGAAACAATCCCTCTATCAAGCATTTGAATTAATGGATACCTTTCTAGAAAGCCGAAACGTGGTTTGTCTGAGAT  
CATCCATCTTCTGTGATTTATCAATTTTGGCTTCTTTTTTTCGACATTTGTGTAAGATTAAGATTAATAAATCAAGACTAATTAAGATTTTGTGTATCGTTTTAACATCTCTT  
AATAGATTTTATAAAAAGAACATAGTTAGAAAAGTAAACCGATTTTCTTTTCAAGAGTGAATTAATTCACAAAATTAATTTATACCTGATATATTTTTTTTACAATTA  
TTTCAGTATTGTGGAGCTAACGTTAGCAAGTACAAAACATCTAGCTTGGTACAAGCGGTGTAATCTCTGCCAGGATTCGATGAGAACGAAAGTGGCGCTAAAGGATTTG  
GTAAGGTGGTTAAGGAGAAAATCGGCATTACGGGTACATGGGATTGATGCATTAATATCCATCCGTTATATGTTTTCATCATGCTCAAAGTATGTTTGTATGCTG  
TTTCACTCAATATCGATTAATCGATGAATCGGACCGGTTTGTGTCTCGGGTTGTCTCATCGTTAGATGTTTCTAACGTATGTGGAGAATATACATATAAGAGAAA  
ATATAAAGAGATAAGCAAGAATATGTAG

>LLOJ001842\_a (221 aa; 4 exons) | EDITED  
MAPVKFYHLPLGPPSRGVLITIRNLNLDVEIIEVDIFKGEHLTPEYLEMNPQHTIPALNDNGLYLGESKAISTYLVNSKAPGNPLYPTDPAVRAQVDKLYFDAATIF  
PRMRAIFPILFLGSKTIEKEKKEAFYQALDFMNTFLEGRWFADHPTLADLALLASFSTFVYCGADVSKYNTLAWYKRCSLPGFSENEEMAKKLGVLVEKGLG  
TYWE-

>LLOJ001842\_b (>167 aa; >3 exons) | EDITED (PARTIAL - C-TERMINAL MISSING)  
MAPLKIFYHFTLGSPPSRGVLITIRNLNLDVEIIEVDTVKGEQMPDFVKINPQHILPTIDDNGFVLWESKAISTYLVNSKAPGNPLYPTDPKIRALVDSRMQFDSLSL  
PKIRDNFPPVLVSGVRKIEEEKKQAIYQTLNMTFLEGRQWFAADHPTLADLAILASF

>LLOJ001842\_c (>109 aa; >2 exons) | EDITED (PARTIAL - N-TERMINAL MISSING)  
FPVLVSGVRKIEEEKKQAIYQTLNMTFLEGRQWFAADHPTLADLAILASFSTFVHFGADVSKYKNILAWYKRCSLPGFSENEEGAKEYARMVKENSELPEYDSSR  
M-

>LLOJ001842\_d (221 aa; 4 exons) | EDITED  
MAPLKLYFLEIGPPSRGALLTIRNLGLDVEIIVHDLFSGEHLTPEFLKMNPHQHTVPTLDDNGLFLGESKAISTYLVNSRSPGNPLYPTDPKVRALVDRLYFDATVF  
NRIRNITYPLLVLGKNNVDEEKKKALYDALDLMEIFLEGQKWFADHPTLADLALLATVSSLRVYFGLNVPKYKNIMAWYKRCSLPGFSENEEGAKKYGALVQEKLG  
GFSWD-

>LLOJ001842\_e (222 aa; 4 exons) | EDITED  
MAPLKLYYIELGPPSRAALLTIRNLKLDAEIINVDVINGAHRTPPEYLKMNPHQHTVPTLDDNGFYLADSKAMSTYLVNSRSPGNPLYPTDPKARALVDRLYFDGATVF  
PRIKTISYSVLVLGVNNDVEEKKKALYDALDFMEIYLEGQKWFAGDHATLADLALLATYSSLVHFGLVNSKYKNLQAWYKRCEALPGFAENEKAKKYGAMMKEKLG  
NFSWDV-

>LLOJ001842\_f (221 aa; 4 exons) | EDITED  
MAPLKLYYIELGPPSRAALLTIRNLKLDAEIINVDVINGAHRTPPEYLKMNPHQHTVPTLDDNGLFLADSKAMSTYLVNSRSPGNPLYPTDPKARALVDRLYFDGATVF  
PRIKTISYSVLVLGVNNDVEEKKKALYDALDFMEIYLEGQKWFAGDHATLADLALLATYSSLVYAGANVSKYKNILAWYKRCSLPGFDENESGAKGFGNVVKEKLSI  
TGTWD-

>LLOJ001842\_g (221 aa; 4 exons) | EDITED



MAPVKFYHMPKGPSRAVALTIRNLKLDVEIIEIDVLNQEOMSEPFVKINPQHTVPTIDDNGFILWESRAIITYLVNSKAPGNSLYPTDQIRATIDARLYFDASTLY  
ARAREIMFPILFLGKTVDEDEKQSLYQAFELMDTFLEGRTWFAADHPILADLSILASFSFVYCGANVSKYKNILAWYKRCESLPGFDENESGAKGFGKVVKEKIGI  
TGTWD-

##### L1 cluster of GSTX genes on JH690204 #####

##### LLOJ009529 - GSTX #####

>JH690204 reverse | **LLOJ009529** (pre-editing) | **LLOJ009529** (post-editing)  
TCAAGTGCAGTACCCGGTGGATGCGACTGCTCCCTCCCAAACCTCTTCAAATATCTTCCGTCAGAGCCGATCTCCTTCTGTGTGGTGTGTGATCTCTGGT  
TAATAGTGAAAGTCAGTCTGATAAGTTGTTGATAAGGGCGTAAAACTCATCTATTTCTTCCACTAAAAACCTTCTGGAAAATTCCTCACA**ATGGCCCAATGAAGTT**  
**CTACTATTTCCCAATGAGTCCACCCCTGCTGGAGCTCTCCTGACCAATTCGCAACTTAAAGTTGGACATCGAGTTGATTAATGTTAACTTGGCGGAGAAGGAGCAACTCAAG**  
**GAGGATATCTGAAAGTCAATCCTGTTTCACTGAGTCCCAATTCGACATGATGGCTTACCTCTTGGGAATCCCGAGCTATCTCTCAATATCTCGTTAGTGCAAAAGCTC**  
**CGGAAGTCCCTCTATCCGGCTGATCCCAAGAAGAGAGCTGTTGTGGATGCTAGACTCTACCTCGATGCTTACCTTCAGGCTTCTGCAAGGATATCTTTGTGAGTATCC**  
TTCGATCTACTCGAGATCATGCAGAAGTTGTCATTTTCTTACCTTCCCTCGGGTTTCAG**TACTCCATCCATACTCTGGGCCAGAAAACCAATTCACACGACAAGAAAGTC**  
**CGCTTTTATCAACTCCTAGAGAGCATGGAGACAATCCCTGGAGGGACAGGAATATGTTTCAGGGAATAGAGGTAACATTGGCTGATCTTCTCTCTCTAGCTTCGATCTCCAGT**  
**TTATTGTAAGTCTATAAATTTTTGAAACTTTTTTTTGTATCTCCGGAATGTTATTCAACTTTGATGTCATTTGCAGTACCGCAGGAGTTCCCATGAGCAAGTACAAGAACA**  
**TCCTGGCGTGGTACAAGCGATGTGAAAACCTCCAGGTTATCAAGAGAATGACCAAGTAGCCAAAGGCCATGGAGACTTCTGAAGAATCTTCTAGGGATCACTGGAACATG**  
**GGATGATGTTCTGGAAGCCTAA**AACACTTCTTGGATTTCATTCCAAATTAATTTTTTTTAAATATTTTTTTATGTCATTTTTTGGACTCTTCTGAATGAGATAATA  
AAGGAATGGATGACTTAATAATTTTTTTAGTTAAAGTATTATAGAACAATACAGATTATTCATCCCAATGATCTTTTACGTTGATTTTGGATTTAAACATTTGCC  
AAAAG

>**LLOJ009529** (225 aa; 3 exons) | **UNCHANGED**  
MAPMKFYFPMSPPCRALLTIRNLKLDIELINVLNREKEQLKEDYLKVPVHVSPTLDDDGFIWESRAISQYLVSAPKAPGSPLYPADPKKRAVVDARLYLDAYLQA  
SARIIFYSIHTLQKTI SHDKKVRFYQLLESMETILEGQEYVAGNEVTLADLALLASISTFIYAGVPM SKYKNILAWYKRCEENLPGYQENDQVAKAYGDFLKNLLGIT  
GTWDDVLEA-

##### LLOJ009528 - GSTX #####

>JH690204 forward | **LLOJ009528** (pre-editing) | **LLOJ009528\_a**, **LLOJ009528\_b** (post-editing)  
TTTTAGTGTAAAAATGCTATTTTCATTCGCTGAGACTGACTGCTGATAGAGCGAAACTGCAGATAAAAAAACTCATTTCTAATCAAAGGGACAGAGAATGATGTA  
GCTCAATATAAAAAATCGTTCCAATATTTCCCTACATTCAGTTTATTTCCAACCTACCGCAGAAGGTGAACCTCTTTCCCGCGCAAATTTGAA**ATGGCTCCACTTAAGCT**  
**CTACCCTACCCCATGAGCCCACTCGCGATGTGCCCTCTTACGGTGCAGAAATGTGAAAGTTGACCGCGGAAGTTATACGGTGGATTGTTCAAAAAGGATCAATTTGGCT**  
**CGGAATTCGTGAGATCAATCCTCAGCACACAGTTCCTACAATTGATGATAAATGGGTTGTTTGTGGGAATCTCGTCTATTTGCCACCTACTTGGCTCTACTAAGCTG**  
**CAGGAAGTCCCTCTACCCAAATGATCCCAAAAACGGGCCATTGTTGATGCCAGGCTCTACCTCGATCAGGCTTTGCAGATTGCAACAGGAGCCATCATG**GTATGTTGGC  
AAGATTTTCATTGAGAAAAAGAGATTTTTTTTGTGATTTTCTGAACATTTTTCCAG**TACCCAATTCACGCAGAAGGAGCTACATCAATCCACAGGATAAGAAGGATAA**  
**AGTCTACAAAATGCTAGGTGATCTGAACACCTTCATGAGGGGAAATTCATACGCAGCCGGCAATGAGCTCACGTGGCTGATTTAGCTCTCTTAGCCACTATCTCGACAGCT**  
**CAT**GTAAGTTTATCTAATAGTACTTGATGTAAGGATTTATGCTCAATCACTCCGATGGATTTATCAATGTTGATTTATGTTTTCCCCCACAG**GGTATTGGGGCTAAT**  
**ATCAGCAAGTTTAAAGAACATCGCAGCATGGTACAAGAGACTCGAAACCATTCCTGGTTTCCAGGAGAACGAAGAAGGAGCTCAAACCTCTCGGAAGTACATGAAGGCC**  
**AAGATTAATCTCATCGGAAGTTGGGATGATTAG**AAGTTAAATTTTTAAGAATTTATATTCAAATAATTTTCGTAATAAAGATAAAAAGAAATCGTAACAGGTGCCTGAATA  
TAGAACCTGATACTGATATATTGATTACGTTGTTATCATCTTGTGCTACTGAAGAGTTTATTTTCTATCCCTTATCAGTCGAATGATTTGGGAATGCTTCATATT  
GTTTTGTTTTTTTATGACAGGTTTTATGTAGAAGAATAACATTTTAAAGTAGGCAATCTAAATTTAAGTTTAAAAAAGAAATTAATTTTCTAAGTT  
TTTTTTATTCATTTGTTGAAAGCTTGTGTAAGCACTTTGAGAATACTTAGAAAATTCCTAAGTTAGATATGACTGATCCTAATTCGAATTTAAGAAAGAAGAA  
GCTCAGACCTATATGGCCATATAACATTAACATAAGCTGAGGCTTCAATTTGTAACACGACTAAGTTCGTTTCGGAGCTCATACAAAGTTAGCCGTTTTACAATCTA  
GCCCTCGCTACGCTTAATCACAAAATGCTTAAAATGCATGAAATATTAATTTAAGATTAATAAAAAAAGAAAACAGAAATAGGGACTAAGCCTTAATCAGGTCTGA  
TCAGGCTATTTAGTAGCTCAGCCATAACTAAGTTCCCTAAGAAAAATCATTTAAATCAAGATCTTTTTTGAATATTTTTCTCTTGTGCGCTTCTAAAAGAACAGACAG  
TCTTGAATGATTTATTTATTTTATTTTCTAATAGATAAAAAGTACATTTTCTTCAAGTACACCTGATAACATTAGGCAGGTTTTAGGTTCCCTTGTATCCACCC  
ACTAGTCGTGACTTGGAACTGTTGGAGCTGCAACTAGATAAGATTCACTTTCAATTTCCCTCGAAG**ATGGCTCCCTTTAAATATTTACTACCCCGAAGGAGCCCC**  
**AATAGGGCTGCTTTACTAATCTTCCGAATCTAATTTGGATGCTGAAGTAATTTTTGTGGATCTCCGAAAAGGAGAATCTAACGGAGAAATTTGTAATAATTAAT**  
**CCCCAACGGTGTATGCCGCTCTTGGATGATGATGGCTTCATCTTTGGGAATCAAGAGCAATCTCACAGTATTTAGTGACAACAGAGCTCCTGGGAGTCCCTTTAT**  
**CCCACTGATCCCAAGAAGAGGGCTACTGTTGATGCCAGACTTCATTTGGATTGCACACTGCACGCAATTTCTAGGCTTTTTTCTGTAAGTTTCTTCTTAAATCTT**  
ACACTGAATCGTTAGAATTTAATAATTTAGGACCTTCTCTTATAG**TATCCCATTCATCTTTGGGTGAGACAAAATTCCTCGATCCGCCGAGCAGAGACTCTACAACTT**  
**CTTGGACATTTGAACGACATGATGGAGGGTCAGAAAATTTGTAGCAGGAGACCACTACAATTTGGCGACTTTTCACTTCTAGCTTCCCTTTTCAACCTACTAT**GTAATAAAT  
AAGTTTGAAGATTTAAACAGAAAATATTCTTACGATGGATTTTTCTTTTACAG**CACGCTGGAGCTAATGTAAGAGATCTGAGGAATTTGATGGCTTGGTATAGGAGATGC**  
**GAAGCCCTACCTGGATTTTCAGGAAAACGAAAAGGAGCTCGAGCTTTTGGGCAATGTTTAAATCCAAAATCAGCGTAAAAGATCATTTGGGATGAATAA**CCTGTATTGTTCT  
TTAATTTTTTTGTTAGAATTTGTCAGAAGACTTCTTGATCTGTTTCTCTTTTTTCAAGACTTAATCACTAGCCTTCGACCCTAATAGCGGGTCTTCTTCACTGTTCT  
TTGCTTGTCAATTTCTTGGAGATTGTGCTCCTCTGGAATGTTCCACACTAGGTTGATTTATTAGGAAGCTCGAGCTT

>**LLOJ009528\_a** (221 aa; 3 exons) | **EDITED**  
MAPLKLHYHPMSPPSRCALLTVRNKVDVAEIVTVDFPKKDLAEPFVKINPQHTVPTIDDNGFVLWESRAIATYLASTKAAGSSLYPNPDKKRAIVDARLYLDQALQI  
ATGAIMYPIHAEGATSIPODKDKVKYKMLGLDNTFMEGNSYAAAGNELTVADLALLATISTAHGIGANISKFNIAAWYKRLETIPGFQENEEGAQTLGKYMKAKINLI  
GTWDD-

>**LLOJ009528\_b** (221 aa; 3 exons) | **EDITED**

MAPFKYYYYPEGAPNRAALLTIRNRLNLDAEVIFVDLRKGEHLTEKFKVKNPQRCPMLDDDDGFILWESRAISQYLVTTTRAPGSPLYPTDPKCRATVDARLHLDCTLHA  
ISRSFFYPHSLGETKIPDPPKQRLYKLLGHLNDDMEGQKQFVAGDEPTIADFLSLLASFSSTYYHAGANVRDLRNLMAWYRRCEALPGFQENEKEARAFGQMFKSKI SVK  
DHWDE-

##### LLOJ010488 - GSTX #####

>JH690204 reverse | LLOJ010488 (pre-editing) | LLOJ010488 (post-editing)

CTTTTGTGCCACAATCCCGCCTTTTGGTTCGAATTTTAACTAAAAGTGAGAATTTTTTTTGTGGCTCAAGAAGTATTTCTGGACATCAAGGCTAATT  
TTTTTGGGTGGAAATCATATAAAGTGATTAAGTAAAGATTTTTTTCGTGTGATTTCTTTTTGCTAAAAGCCAAAAAAGAAAGATTCGCAATGGCCCATGAAGCT  
CTATCATATCCACTCAGCGCTCCATCCCGTGGAGCTCTCTCGACCATCCGAATCTCAATCTTGACGTTGAGGTAGGTCAATTTTAAACAATTGCTTCCGCAGTGTGAAA  
TAAAAGAAGATTTTTAAATGGGAATTTATGTCGACAGAAAAATCTTAATATACAGGAAGAATTTAAATTTTTGAACATTGACCAACAATGAAATATTTTTATGTTA  
AGTAAAAAAGAGTTCAGGAAGTAGTTAAACCGTCAAGTTTTAAAAGTTAAAATGTGAATTTGAGTTTAAATAATTTATTTTTTATAATCTTTCAATTGTTCTT  
AATCTGATGAAAATATTTTTCTTTCTTTTTTTAGTTTCAGAAATATTTTTCAAGTTTAAATCAAGATATAGAATATAAATTTCTAGCTCCTGAATATGGACATGGGCA  
ATTTTGTAAAAGCGACAAGAAATCAATAAATATGCTTATTGCCACCCATTTTGTTAAATTTAGACAAGAAGTAAAGAAAGCCCTGAAAATTTATAAAAAATCAG  
TAAGAAAAACTTCTAAAAAAGATGAATTAAGATCAATAAATGATTTCTCTGCTGTAAAAAAGTTGTTACTTTATTAATATTTATTTATTTATTTTCAATTCA  
ATTCACTTGTACCTTAAATGTTTTTCTTTCTTTTTAAAAATAAATTTGAAACGAAACAAAGATCTATCTAATTTTTTTTAAATCAGTGTTCGATTTTTTTTATA  
CCAAAAATCCTTTTTTTTCTGTAATATTTTCCACGAACTCAAAATCAATTTTTATTTGTTTAAAAGCTTCAAAAATTAATAATGTTGTTAGAGAAGTATGGGAGT  
TCAGTACCTACATATATAATGATGATATTTAATAGATAGATAGATAGATTGTTATTTTACTCGAACTGTGCATACAAAATCAAAACAATTTTACATCTAGTAAAAA  
AAAAAAATTTCCACATGTTCTTTATATTCTTCTCCCTAATCAGATTTGTTCCAAGTTGACCTCATGAATAAAGCACATTTGTCTCCAGAATTCATCAAAATCAATCCTCAG  
CACACTGTCCCAACTTTGGAGCATAATGGATTTACTTTGTGGGAATCTCGTGTCTATTGCCACATACTGGTCAACTCGAAAGCTCCGGGAGTCTCTGTACCCCACTGATC  
CCAAAATAGGGCCATTGTGGACTCTCGTTTGTATTTTGTATGGCTCAAGTTTGTATGCAAAAGCCAGAGACATTTGTTGTAAGTTTATTCTAAAAAATCTGGTTTTCTC  
TTGAATCTTTTTAATTTATTTATTTTCTTTAGTTCCCAATTTTCTTTCATGGCGTGACAGAAGTTGATGAAGCTAAGAAACAGGCCCTGTATGAAGCTTTTGGTGTGA  
TGAATACTTTGCTTGAAGGCGAGGATTGGTTGTCAGCTGATCTCAACTGTAGCTGATTTGGCTCTTCTTCTACCTTCTCATCTTTTGTCTGTAAGTCTTATTTTATAAG  
TTAAGATCTTCAAGAGCTTGAGAAATATAAATGAAATTTAAATATAAATTAATATAATTCAGATGTCTGGAGCAAAATGCCAGCAAAATCTCCAAATTTGATGGCT  
GGTACAACCGCTGTGAGTCTTTGCCAGGATTTGATGAGAATGAGGCTGGAGCTAAAGCTTTCCGGCAGGCAATCAAGGGAAAGCTCGGTATCACCGGCACATGGGATTAGTT  
TCAGCCTAAATATCTGGCTTAAACCAAGTGAATTAATTTCCGTCCAATATCTTAAAAATGCACTTAATCTTAAATTTGTTTTCAGCCACTTTTGTGCTTAAATAA  
AAATTAATAAATAAATTTCTGTTTTTTATTAATTTTCTTCGAATCTTTTATTTGAAATTTGAGCTTCAAAAAGTGTCTTGTCAATTTTTT

>LLOJ010488 (221 aa; 4 exons) | UNCHANGED

MAPLKLYHYPLSAPSRGALLTIRNRLNLDVEIVQVDLMNKAHLSPEFIKINPQHTVPTLDDNGFTLWESRAIATYLVNSKAPGSPLYPTDPKTRAI VDSRLYFDGSSLY  
AKARDIVFPIFFMGVTEVDEAKKQALYEAFVGMNTLLEGQDWFADHPTVADLALLSTFSFVHAGANASKYSNLMAWYKRCSLPGFDENEAGAKAFGQAIKGLGI  
TGTWD-

##### LLOJ010539 - GSTX #####

>JH690204 reverse | LLOJ010539 (pre-editing) | LLOJ010539 (post-editing)

AATACCTACGTACATATTACCTCATTTAATAGCCAAGTATTTAGTCTTGGGTGAAGCTTCAATTAGGCTGTGCGGCAATTTTCTCGTTTTTATTTTCTTAAAGAAA  
GGTGAGTAAAGAAGATTTTTCTTGGTCTTTTTTCTCTAGTTTTGAAAGCAATTTTGAAGATTTATGTTGGTTTTCTATTTCAGCTTAAATGGCTCCATTGAAGCT  
CTATCATTTTCTATCAGCATCCCTCCGAGTGGCCTTACTGGCCATCCGGAACCTTAATCTTGATGTTGAGGTAAGTTTTTTTTTAAATTAATTCATTCCCATAGCAA  
AATCATAGACTGAGAATCTTAAACAATGAATAAATCCCAATTTTAAATAATGTTTTTACTAAAATGTTTTTCAAAAATTTTATCAGATTTATAGAATTAGATCTTAT  
GAAACAAGCTCAACTATCCCGGAATTTCTTAAGATTAACCTCAACACACTGTTCCAACTCTTGATGATGATGGCTTCAATTCGTGGGAATCAGGAGCTATTGCAATGTAT  
TGGTGAAGCTCAAAAGCTCCCGAAGTACTCTTTATCTACTGATCCCAAGGTCAGAGCAATTTGTTGACTCTCGCTTGTCTTTCGATGGAACATACTTGCATCCAAAGGCTA  
AAGAAATCATTTGTAAGTTAATCATTTGAGAATATTTTTAAAAATATCTTTAAAGTAAATTTAATTTATCTAAAATTTATTGCAAAAATATTTTATAGTACCCAAATTTG  
GACATTTGGCGTGAAGGAGATCGATGAAGCAAGAAGCAAGCCCTCTATCAGGCTTTTGATTACATGAATACCTTTCTGGAGGGAAAGGAATGGTTCGAGCAGATCATCCA  
ACAATCCTGATTTGGCGCTCTTGGTTTCTTCTCGCTTATTTTTGTAATTTAATATTAAATGCAATTCAGGATAGAATTAACCAATTAATATATTTTATAGCAGCG  
TGGAGCGAATGTAAGCAAGTACACGAATTTTGGCTTGGTACAACCGTTCTGAGTCTTTGCCAGGATTTGAGGAGAATGAGGCTGAGCTAAAATTTATGCAAGTACTA  
AAAGGAATGCTAGGAATCACCGGCACCTGGGATTAGTCAAGTCAAGAGATTTGAGATTATGTTTTTTTATGAGAATAAATAATTTTAAAGTAAATCTAACGCCTTT  
ACAATTAATTTCTGTGAAAGCTGGCCTCAGTATACCTATGCTATATACATATCTATACACAGCAGAGTCAAGCTTACTTATGATTTTATGATTTTTATCCCATGAG  
ATATTAATAATCAAAATCGTT

>LLOJ010539 (221 aa; 4 exons) | UNCHANGED

MAPLKLYHFPISIPSRVALLAIRNRLNLDVEIIELDLMNKAQLSPEFLKINPQHTVPTLDDDGFIWESRAIAMYLNSKAPGSTLYPTDPKVRAI VDSRLFFDGYLH  
PKAKEIIVPIWTLGVKEIDESKKQALYQAFDYMNFTLEGKEWFAADHPTIADLALLVFSFVHAGANVSKYTNLLAWYKRCSLPGFEENEAGAKTYGQVLKGLGI  
TGTWD-

##### LLOJ010538-RA, LLOJ010538-RB (shared exon 1 italic, not underlined) - GSTX #####

>JH690204 reverse | LLOJ010538-RA (pre-editing) | LLOJ010538-RA (post-editing)

ACTTCAGTGTCTCTTTTCCAGTTCAATTCGGTGAATTTCAATCAAAAAGTGAGTCTTATGATCATCTTGGCTGACAGAGAATATTCTTTAAGCTCCAAGGCCAT  
TTTTTCTCTCAAAATCTGGCATCAAGGCAATTTTTGTTGATGATTTAATGAATCTTTTTTGTGTGATTTCTCTCCAAAAAGCAGCCAAACAATGGCCCACTGAAGTT  
GTACCAATTTCCAAATCAGTGTCTCCCTCCCGTGGAGCTCTTCTCGCCATCCGGAATCTGAAGCTTGATGTTGAGGTATGTTTAAATAATGCTCCATGGTGCATAAAGTAAAA  
TTTGTAACTTTTATGTTAATGAAAAGAATTTGTTGAGAAATACGCAGCTGAAAGTTGAATAGAATTTCTCTGAATGGAGGTGAAAGTGAATAAGTTTTCG  
GTAGGTTGGCAGAGATTAATCATTTAAAAGGGGACAGAAAATGAATAATTTGTTTCAATTAACCTACTCTCGTATTCTTCTCCCTAAGGGCATTGCCATTTAACT  
CGATGGCATGACATGATAAGTAAAATGGAAGTTATCTGAAATTTTATTTATCTTCATCAATAAGAGACAAGTTGAGGGTGAAGTGTGAAATAAAATTAACAAC

TCACCTTAGTAAATATATTTAACTTGAACCCTAATGAACCATGCTTGCCCATCTAATACAAATGATTTAATTTGAAATCTTAAAAATAGTTT TAGATATCCATT  
AAAATTTTCATTTAATTTAGTTAGTAGAGTGAATGTTAAAGAGCCTTGACATTATCGAAGCTCATCTATGTTAAAATATTAAGTAGATCCACTAAACAAATGAAAAATA  
ATCCATAAGAAAACATAAAAATTTCCCTCTCTACTCAAACAAGTCATCATAATTAATCAAATGATCAGTTGATAAGTCCAAAAAAGATGGGTATAGAAAATGTTAA  
AAATAGATTTCTACTCGCTCTGTCTTTTCCCTGAAGCATTCTTTGCTTCATTTTATAACAAAGAACTCTTAGAAAAATAAATCAAGCTTAAGAATGGCCATAAAAAAT  
TATACTCGTCTTGTAGATCGTGGAAATCAATCTCATGAACAAAGAACAATTTATCTCCGGAATACGTCAAAAATCAAACCTCAACATAACCGTTCCAACCCTTGACGATAATG  
GCTTTATCTTGTGGAAATCTCGTGCTATTGCCACTTACCTTGCAAACTCCAAAGCTCCTGGAATTCCTCTATCCCACTGATCCAAAATTCGTGCTGTTGTGGATTCAAG  
CTTGACTTTGTAGCCCTCAATTTATCCCAAAGCCCGGAATATTGTTGTAAGTTCTCTCTATACCTCATCTTCTCTCAGTTTGTTTACAAAATATATTA  
AGTTAGTCTGCTTTTAGTTCCCTATCTTATCTGGGAGTAAAGGAAGTTGATCCAGAGAAGAAGCAAATTTGTATCAAGCTCTGGAGTTTATGAATACTTACCTAGAAG  
GGCAGAACTGGATAGCAGCTGATCCTACTCTCGCTGATTGGACGCTCCTATCCCTCAATTCATCGATTATGTACGTAATTTGGAGCAGGGTATTCTTTTTACA  
GAGTTTGATAAATTTTACCCAATCCTAATTTTCTAAATTTTACAGCATGCTGGAGCTAATATCAGCAAGTTTCCAACATCATGGCCTGGTACAACCGTGTGAG  
TCCTTGGCTGGATTGAGGAGAACGAAACAGGCCAAGGCTTTCGCGCCAGGCAATTAAGAAGAATCTCGGGATCACAGGCACATGGATGACTAAATCACCAGGAATTTG  
TTGAACGCTGTCTTTTATACTCTACCATATGCACTTGACTTTTCAGAGATTATTTGCAAGAGTTGTTAATAAATATTTTTCTGGGATTAATAAGTCTGGTGT  
GATTTTATTTAATTTTTTTTTTCAACGAAATGAATGCAGAAATTAATAAATATTTTCTTTTAAATTTATTAGATTAGATTGATAAGGTCGATCAACAAGCCGAGC  
TGTCGCCGTGAGTTCGTCAAAATCAACCCTCAGCACACTGTTCCAACCTTTGACGATGATGGCTTCATTTGTGGGAATCAAGGGCTATCGCTGCTTACTGGTCAGCTCCAA  
AGCTCCGGGAGTCCCTCTGTATCTCCTACTGATCTAAGATCAGGGCCGTTGTGGACTCTGCTTGATGATCAAACTTGTACCCCTAAGCCAGGACATTATTGTATA  
AGATTGAGCTTCTCTGTGATCTAAAAATTAATTTTCTTAAAAATTTAATATCTGATTTTCTTTAGTTCCCAATCTATTTCTGGGGCTTAAAGAAGTAGACGAA  
GGAAGAAGCAAATCCTCTATCAAGCTCTGGAGTTCATGAATACCTTCTTGAAGGAAAAGACTGGTTTGCAGCTGATCATCCCACAATCGCTGATTTGGCTCTCTTGGCTTC  
ATTTGCTTCAATTTTCTGTAAGTTTTCTCGAGTTTTCTTTGCCAAATTATTAGATTTTTTAATAAATTTAATTTTCTAGCACGCTGGAGCAAATGTGAGCAAGTACACGA  
ACATATTGGCTGGTATAAACCGCTGCGAATCTTTGCCAGGATTTGAGGAGAATGAGGCTGGAGCTAAAACCTTTCGGGCAAGCAGTGAAAGGAAAGCTCGGCATGACTGGAAA  
TTGGGACTGAAAGTATTATTAGCAATATCATCATACTTAATTTATAACATTTACTAATGATTTAATAAATTTGAGCTTCAATGTAATCAAAAATTAGTT

> LLOJ010538-RA (222 aa; 4 exons) | UNCHANGED  
MAPLKLYHFPISAPSRGALLAIRNLKLDVEIVEINLMNKEHLSPFYVKINPQHTVPTLDDNGFILWESRAIATYLANSKAPGNSLYPTDPKIRAVVDSRLYFDASNFL  
PKARNIVFPILILGVKEVDEPKKQILYQALEFMNTYLEGQNWIAADHP TLADL LLLSISIIYHAGANISKFPNIMAWYKRCSLPGFEENETGAKAFGQAIKKNLGI  
TGTWDD-

> JH690204 reverse | LLOJ010538-RB (pre-editing) | LLOJ010538-RE (post-editing)  
ACTTCAGTGTTCCCTCTTTCCAGTTCAATTCGGTGAATTTCAATCAAAGTGAGTCTTATGATCATTCTTGGCTGACACAGAGAATATTCTTTAAGCTCCAAGGCCAT  
TTTTTCTCTCAATCTGGCATCAAGGCAATTTTTGTGATGATTTAATGAATCTTTTTGTGTGATTCTCTCCTCCAAAAAGCAGCCAAACAATGCGCCCACTGAAGTT  
GTACCAATTTCCAATCAGTGCCTCCCTCCGCTGGAGCTCTCTCGCCATCCGGAATCTGAAGCTTGATGTTGAGTGTATGTTTAAATAATGCTCCATGGTGATAGAAA  
TTTGTAACCTTTTATGTGATTTAATGAAAAGAACTTGTGGAGAAATTCGACGAGTGAAGTGAATAAGAAATTTCTCTGAAATGAGGATGATAATAGTTTTGCTG  
GTAGGTTGGGCGAGAGTAATTCATTTAAAAGGGGACAGAAAATGAATAATTGTTTAACTCTACTCTCGTATTCTTTCTCCCTAAGGCATGGCATTTAACT  
CGATGGCATGACATGATAAGTAAAATGGAAGTTATCTTGAATTTTATTTTATCTTCATCAAATAAGAGACAAGTTGAGGGTGAAGTGTGAAATAAATTAACAAC  
TCACCTTAGTAAATATATTTAACTTGAACCCTAATGAACCATGCTTGCCCATCTAATACAAATGATTTAATTTGAAATCTTAAAAATAGTTT TAGATATCCATT  
AAAATTTTCATTTAATTTAGTTAGAGTGAATGTTAAAGAGCCTTGACATTATCGAAGCTCATCTATGTTAAAATATTAAGTAGATCCACTAAACAAATGAAAAATA  
ATCCATAAGAAAACATAAAAATTTCCCTCTCTACTCAAACAAGTCATCATAATTAATCAAATGATCAGTTGATAAGTCCAAAAGAATGGGTATAGAAAATGTTAA  
AAATAGATTTCTACTCGCTCTGTCTTTTCCCTGAAGCATTCTTTGCTTCATTTTATAACAAAGAACTCTTAGAAAAATAAATCAAGCTTAAAGATTTGGCCATAAAAAAT  
TATACTCGTCTTGTAGATCGTGGAAATCAATCTCATGAACAAAGAACAATTTATCTCCGGAATACGTCAAAAATCAAACCTCAACATAACCGTTCCAACCCTTGACGATAATG  
GCTTTATCTTGTGGAAATCTCGTGCTATTGCCACTTACCTTGCAAACTCCAAAGCTCCTGGAATTCCTCTATCCCACTGATCCAAAATTCGTGCTGTTGTGGATTCAAG  
CTTGACTTTGTAGCCCTCAATTTATCCCAAAGCCCGGAATATTGTTGTAAGTTCTCTCTATACCTCATCTTCTCTCAGTTTGTTTACAAAATATATTA  
AGTTAGTCTGCTTTTAGTTCCCTATCTTATCTGGGAGTAAAGGAAGTTGATCCAGAGAAGAAGCAAATTTGTATCAAGCTCTGGAGTTTATGAATACTTACCTAGAAG  
GGCAGAACTGGATAGCAGCTGATCCTACTCTCGCTGATTGGACGCTCCTATCCCTCAATTCATCGATTATGTACGTAATTTGGAGCAGGGTATTCTTTTTACA  
GAGTTTGATAAATTTTACCCAATCCTTAATTTTCCCTAAAATTTTACAGCATGCTGGAGCTAATATCAGCAAGTTTCCAACATCATGGCCTGGTACAACCGCTGTGAG  
TCCTTGCTGGATTTGAGGAGAACGAAACAGGCCAAGGCTTTCGGGCGAGGCAATTAAGAAGAATCTCGGGATCACAGGCACATGGGATGACTAAATCACCAGGAATTTG  
TTGAACGCTGTCTTTTTATACTCTACCATATGCACTTGACTTTTCAGAGATTATTTGCAAGAGTTGTTAATAAATATTTTTCTGGGATTAATAAGTCTGGTTTT  
GATTTTATTTAATTTTTTTTTTCAACGAAATGAATGCAGAAATTAATAAATATTTTTCTTTTAAATTTATTAGATTAGATTGATAAGGTCGATCAACAAGCCGAGC  
TGTCGCCGTGAGTTCGTCAAAATCAACCCTCAGCACACTGTTCCAACCTTTGACGATGATGGCTTCATTTGTGGGAATCAAGGGCTATCGCTGCTTACTTGGTCAGCTCCAA  
AGCTCCGGGAGTCCCTCTGTATCTACTGATCTAAGATCAGGGCCGTTGTGGACTCTGCTTGACTTTGATGGATCAAACTTGTACCCTAAGCCAGGGACATTATGTATA  
AGATTGAGCTTCTCTGTGATCTAAAAATTAATTTTCTTAAAAATTTAATATCTGATTTTCTTTTAGTTCCCAATCTATTTCTGGGGCTTAAAGAAGTAGACGAA  
GGAAGAAGCAAATCCTCTATCAAGCTCTGGAGTTCATGAATACCTTCTTGAAGGAAAAGACTGGTTTGCAGCTGATCATCCCACAATCGCTGATTTGGCTCTCTTGGCTTC  
ATTTGCTTCAATTTTCTGTAAGTTTTCTCGAGTTTTCTTTGCCAAATTATTAGATTTTTAATAAATTTAATTTTCTAGCACGCTGGAGCAAATGTGAGCAAGTACACGA  
ACATATTGGCTGGTATAAACCGCTGCGAATCTTTGCCAGGATTTGAGGAGAATGAGGCTGGAGCTAAAACCTTTCGGGCAAGCAGTGAAAGGAAAGCTCGGCATGACTGGAAA  
TTGGGACTGAAAGTATTATTAGCAATATCATCATACTTAATTTATAACATTTACTAATGATTTAATAAATTTGAGCTTCAATGTAATCAAAAATTAGTT

> LLOJ010538-RE (221 aa; 4 exons) | UNCHANGED  
MAPLKLYHFPISAPSRGALLAIRNLKLDVEIVEVDLINKAQLSPFVKINPQHTVPTLDDDFILWESRAIAAYLVSSKAPGSPLYPTDPKIRAVVDSRLYFDGSNLY  
PKARDII FPIILFLGVKEVDEGKQIILYQALEFMNTFLBGGDWFADHP TLADL LLLAS FASIFHAGANVSKYTNILAWYKRCSLPGFEENEAGAKTFGQAVKGLGM  
TGNWD-

##### LLOJ010537 - GSTX #####  
> JH690204 reverse | LLOJ010537 (pre-editing) | LLOJ010537 (post-editing)  
NNTTTTTTTTTCAATCTTTTTTAAAACCTAAATCTCACTTTTAAAATTTATAACATAAAATGTAATATATAGTCTATTATAGATAATCATGTATCTCTTGGA  
TATAATAAACCATTTATTCATTCATTCATTCATTCATTCATCAAATATTCAAGAGTTTTTTGTACGATTCTTTACATAAACACATCTAACATAATGGCACCAATTGAAGTT

GTACCATTTCCCAATCAGTGCCTCTAGAGTGGCCCTTCGACTATTCGGAATCTAAATTTAGATGTTGAGGTAATTTTTCAATTGAAAAATTGAATTTTTATTGAGATT  
AATTATTGTTGATAATTGAAAAAATAAGAAAAGAACTAATAAAGATTTATTTACATATAAATTCATTTTCTATAATAACTAGGTATAGTTAGGAATTCAGGGAA  
TTGATAGAAATGCGAGGTTTTTATGAATTTGTGAACTTTATCAATTTTCGTGGCCTTTAATCCTCGCACTGTAAGTGTAGAAAATGAATATTTTCGTAACCTTTCGGTTGA  
TTTTATTATAGATTGTTGAAATTTGATCTAAATCAACAAAGCACATTTGCTCCGGAATTCGTGAAAATCAATCCTCAGCATAACCGTCCCAACTTTGGACGACAAATGGATTT  
ATTTTGTGGGAATCAGGAGCTATTGCTCTCTATTGATCAACTCTAGATCTCCCGGAAGTCTCTGTATCCAACAGATCCCAAAAATTCGAGCTGTTGTAGACTCTCGCTTGT  
TCTTTGATGCATCAAGTTTATTTCTAAAGCAGGAAATCTCTTTGTAAGGATTTTTTCTGGAGTTTTACTGAATTTCTTTATTGTTTTTCTTTTTGTTGGTTTCAG  
TTTCCAATCCTTTTCTAGGTGTAAGGAAGTTGATCCCGAATGAAACGAATCTCTATGAAGCTCTGTATTCATGAATACCTTCTTGGAGGGACAAAATTTGGATTGCAG  
CTGATCATGTAACAATTTGCTGATTTGACGCTCTACCTCTGGTTCTTGTATTATTGTACGTAACCTTTATTTAGGGAGATTTTTTAAAATTAATAAAGGATAGTTACA  
TAATATATTTTTTACAGCATTCTGGAGCAGAAGTTTCAAAAATTTCCAACATAGAGGCTTGGTACAGCGATGTGAGACTCTGCCAGGATTTGAGGAGAAATGAATCTGGAG  
CCAAGGAATTTGGGAAATTTGATTAAGGAAAAATTAGGAATTACAGGGACATGGGATTAAGCTATAATGGTAGCATCTCTCATATTTAATTTAGTAGAGAAATTTCTATAA  
AAATATCTTTTTCTGTATAAAAACTATAATTTCTATTTTAGAACTTTCATCGGTTTCATGTGTCAATCATGACAATGCATAAAAATTAATTCCTTTTATTAATTT  
CTTATCTAAATAATAAGTTTTTCACTTGAATAATTTTT

> LLOJ010537 (221 aa; 4 exons) | UNCHANGED

MAPLKLYHFPISAPSRVALLTIRNLNLDVEIVRIDLINKAHLSPFVKINPQHTVPTLDDNGFILWESRAIALYILNSRSPGSPLYPTDPKIRAVVDSRLLFFDASSLF  
PKARNLLFPILFLGVKEVDPELKRILYEALDFMNTFLEGQNWIAADHVTIADLTLLPLVSCI IHSGAEVSKFSNIEAWYKRCETLPGFEENESGAKEFGKLIKEKLG  
TGTWD-

##### LLOJ010536 - GSTX #####

> JH690204 reverse | LLOJ010536 (pre-editing) | LLOJ010536 (post-editing)

ACTGATATGCGTTATCAAAGGACTCAATAAGTGAATCACAAATCTCTGCTGTGGACTATATAATTTAATTTTCTGCAACAAATAGTTTGTCTTTCCGGTAGATGTCGA  
ACAGATCAAACATCTTGTCTTAAAAAGTTCTAGTTGGTGCATTTAATTTATTTGTGAAGTGAATAAATCGTGAATAACAGTCCCTTAATTTATGGCTCCTCTGAAGTT  
GTATTACATGCCAATTAGTGCCCCAGCTAGAGCCGTTCTCTTAACTATTTCGAAGCTTAAAGCTAGACGTTGAGGTAATTTTTTAAAGAAGTTCTAATTCACAAGAAC  
TCCTTTTAAAATCATTTTTGGGGATTTTCTAGATCAATAAACATTTGACATCTTAAAGGGAGAACAACTCACACCTGAATTCATTAGTATGAATCCTCAACACATGATTCCCA  
CAATTGACGACAATGGGTTTATCTGTGGGAATCAAAGGCAATGCTGCTTACTTGGTCAACTCCAGAGCCCTGGAAATCTCTCTATCCAACATGATCCTAAAATCAGGGC  
TCTTGTGATGCACGCCCTACTTTGATACCTCCACCATATTTACAAAGTCAAAGGAAGTTTGTGTTAGTAAAATTTTAGTTAGTTAAAGCGACGTTAACTGTTAACT  
TCTGAATTAATTTGATTTTCTTAAATTTTAGTTCCCAATCTTTGCTTTGGGAGCTAAAACGGTGGACGAGGAGAAGAAGATGCTTTCTATGAGACACTAGATCTCATGAAT  
ACCTACCTAGAGGAAAGAAATGGTTTTCGGGAAATAAACCACATAGCTGACTTTTCACTCTTGGCTTCTTTCGACTTTTGTGTTGTAGTTTTTATTATAAAGATTT  
TTATGTTTTCTATCTTATTTCTTGAATTTAAATTCAGCATTTCGGGAGCTAATGTGTCCAAATACAAGAACATCCTAGCTTGGTATAAACAATCGAATCCTTGCAGGATT  
TCAGGAGAATGAAGCCGCTGCTAAGGAATTCGGGAATATGATTAAGGAGAACTAGGCATTAACCGGAACGTTGGGATTAATTTAATTAAGAGCTTCTCGTGAATGATTTTG  
AAAAATGATTTAAAATGAGAAATATTTGAGAAATAAATATTTTAAACAAAGGAGTTTATTCAGGCCAGTATGAAAGATGATCCTCTATCGCAGAACAAATTTAAACCA  
TTCCATCTGTAGAGGATCAAAAACATTTGAAGAATCGCGAGAGAACTCCCAAAAATCC

> LLOJ010536 (221 aa; 4 exons) | UNCHANGED

MAPLKLYYMPISAPARAVLLTIRSLKLDVEIINIDILKGEQLTPEFISMNPQHMIPTIDNNGFILWESKAIAYLVNSRAPGNSLYPTDPKIRALVDRALYFDSTIF  
TKSKEVLFPIFALGAKTVDEEKNAFYETELDMNTYLEGKKWFAGNKPITADFSLLASFATFVHSGANVSKYKNILAWYKQCESLPGFQENEGAKEFGNMTIKEKLG  
TGTWD-

##### LLOJ010535, LLOJ010534 - GSTX #####

> JH690204 reverse | LLOJ010535, LLOJ010534 (pre-editing) | LLOJ010535\_a, LLOJ010534 (post-editing)

AGTTTTTATTATAAAGATTTTTATGTTTTCTATCTTATTTCTTGATTTAAATTCGAGCATTTCGGGAGCTAATGTGTCCAAATACAAGAATCCTAGCTTGGTATAA  
ACAATGCGAATCCTTCCAGGATTTTCAGGAGAATGAAGCCGTTGCTAAGGAATTCGGGAATATGATTAAGGAGAAACTAGGCATTACCGGAACGTTGGGATTAATTTA  
ATTAAGAAGCTTCTCGTGAATGATTTTGAAAAATGATTTAAAATGAGAAATATTTGAGAAATAAATATTTTAAACAAAGGAGTTTATTCAGGCCAGTATGAAAGATGAT  
CCTCTATCGCAGAACAAATTTAACCATTCCATCTTGTAGAGGATCAAAAACATTTGAAGAATCGCGAGAGAACTCCCAAAAATCCACTGGGATCACATCGAAAAGT  
GCAAATAAAAATGCAAAAATTTCAAAATTTGCGACGCCATTTGACATTTTTATCCCTATAAAAATGTTTGAAAATTTTTTGTAGACTTGTGCTCATTTTCCGT  
GGAGTTTTCTTCAAAAATAATGTTTATTTTTCTGTTCTGGAGTATTCTACATCTGAATCAGGTGATCCACAGCGAAATGAAGCTGAGGGAGGTTGATAGAACAG  
CCCCTTGCAATCAAAAACAAATCTTTATACATTTTTTGGGCTCTTTGGCAGTGAGAAATTTAGCATATCTTACCGAGTTAAATCCCATCCAGCGCAATATACCTG  
ATTCAGATGTAGAAATCAATATAGTAGTCAGTATCCGGAACATACGACGGAGTCAAGCAAATCATGACCAGCAGCGAGACATTTCTGAGAGTACAGAACTGCC  
TTCAAAGCTATTTCCGGTTTCCCTCTAAAAGTCTCCTTACCGGATTTGACGAGTGGAACTGGAACACTGGGCAAGTCCACAAAATCTTCATCATCGTCTTCCATA  
CATCTTCCCAAGGACAAATGACTTCTGAGCTGACAAAAGTATTCTCAACTCTCATTTTGCCTCTCAGAGTCTTTACTGCAGAATGCCATGAGGTTTTGCTGTGA  
GAAATTTGGGACTTCCGGAAGCAAAAGATTTGCTCCAGCAGATTTGAAATGAATCAATGGGCAAGTNNNNNNNNNNNNNNNNNNNNNNNNNNNNNNNNNNNNNN  
NNNNNNNGTGAATGGCGGTGAAAGTATAATAGTTTTGCGTAGGTTGGGCAGAGAGTAATTTATTTAAAAGGGGACAGAAAATGAATAATGTTTCAATTAAGTTTGTTC  
TCGTATCTTCTCCCTTAAAGGCATTTGCCATTTAACTCGATGGCATGACATGATAAGTAAAATGGAAGTTATCTTGAATTTTATCGCAATAGAAGCTTTTGAAT  
TTAATCTTCATCAATAAGAGACAAGTTGAGGGTGAAGTGTGAAATAAATTAACAACACTCATCTTAGTAATATATTTAAGCTTGAAAACCTTAAAGAACCTTGC  
TTGTCCTCTAATAACAATTTGTTTAAATAGAAATTTAAAATGATTTTAGATAATCAATGAGAATTTTCAATTTAATTTAGTTAGAACAGTTAGAAAGTGAATGTTA  
AAGAGCTTGCATATCGAAGCTCATCTATGTTAAAATATTAGATTTACTAATAACAAATGAAAATAATCCATAAAGAAAACATAAAAATCTCCCTCTACTACTCAA  
CAAGTCATATAAATTTCAAATTTGATCAGTTGATAAGTCCAGAAGAATGGGTATAGAAAATGTTAAAATAGATTTCTACTCGCTTCTGTTCTTTTACATTTTCCCT  
GAAGTATCTGCTTCATTTTTTAAACAAAGAAATCTTTAAAATAAATCAAGCTTAAGAATTTGGCTTAAAATTTATACGTTCTTGTAGATTCGTGGAAATCAATCTC  
ATGAACAAAGAACATTTATCTCCGGAATACGTCAAAATCAACCCCTCAACATACCGTTCCAACCCCTTGAAGATAATGGCTTTATCTCTGGGAATCTCGTCTATTGCCACTT  
ACCTTGCAAAATCCAAAGCTCCTGGAAATTCCTCTATCCCACTGATCCCAAAAATTCGTGCTCTTGTGGATTACCGCTTGTACTTTGATGCCCTCAATTTATTTCCAAAAGC  
CCGGAATATTGTTGTAAGTTCTTCTCTATACCTCATCTTTCTTCTCAGTTTTGTTTTACAAAATATATAAGTTAGTTGTCTTTTAGTTCCCTATTTCTTATCCTG  
GGAGTGAAGGAAGTTGATCTGGAGAGAGCAAAATTTGTATCAAGCTCTGGAGTTTATGAATACTTACCTAGAGGGCAGAACTGGATAGCAGCTGATCATCTACTCTCG  
CTGATTTGACGCTCCTGCTTCTATTCTTCGATTTAGTACGTAATGTTGGAGGAGGATATTTTCTTTTACAGAGTTGATAAATTTTACCAATCCTTAATTTT

CCTTAATTTTTTACAG **CATGCTGGAGCTAATATTAGCAAGTTTCCCAACATCATGGCCTGGTACAAACGCTGTGAGTCCCTTACCAGGGTTTGAGGAGAATGAAACAGGGGC**  
**CAAGGCTTTCGGTCAGGCAATTAAGAAGAATCTCGGGATCACAGGCACATGGGATGACTAA**ATCACAAGGAATTTGTTGAATTCTGTCTTTTTTATACTTTACCATATGCA  
CTTGATTTTTCTGAGATTATTTGCAAGAGTTGTTTAAATAATTTTTTTCTGGGATTACAATGCTCTGGTTTTGATTTTATTTAATTTTTTTTTGCTCAAAACGAAA  
TGAATGTAGAATTAAGAAAATATTTCTTTTTAATTTATTTAG **ATTGTAGAAGTTGATCTGATCAACAAGCCAGCTATCGCCTGAGTTCGTCAAATTAACCCCTCAG**  
**ACACTGTTCCAACCTCTTGACGATGATGGCTTCATTCTGTGGGAATCAAGGGCTATCGCTGCTTACTTGGTCAGTTCCAAAGCTCCAGGGAGTCTTTGTATCTACTGATCC**  
**TAAGATCAGGGCCGTTGTGACTCTCGCTTGTACTTTGATGGATCAAACCTGTACCCTAAAGCCAGAGACATATT**GTAAGATTGAAGTCTTCTGATTGATCTAAAACAT  
AATATTTCTTTAAGTTTTAATTTCTGATTGTTCCTCAG **TTCCCAATCTATTTTTGGGCGTTAAAGAAGTAGACGAAGGGAAGCAAAATCTCTATCAAGCTCTGGAG**  
**TTTCATGGATACCTTCTTGAAGGAAAGGACTGGTTTGACGCTGATCATCCACAATCGCTGATTGTCTCTCTTGGCTTCATTTGCTTCAATTTTC**GTAAGTTTTTCTTAG  
AGTTCTCTTAGCTAGATTATAGATTAAAAAAGTTTAAATTTTCAG **CACGCTGGAGCGAATGTGAGCAAGTACACGAACATATTGGCCTGGTACAACCGCTGCGAATCCT**  
**TGCCAGGATTTGAGGAGAATGAGGCTGGAGCTAAAACCTTTCGGGCAAGCAGTAAAAGGAAAGCTCGGCATGACTGGAATTTGGGACTGA**AAGTATTATTGAGAATCATC  
ATACTTAAATTTATAACATTTACTAATGACTTAATAAAATTTGAGCTTCATTGGATTCAAATTTATTTTTGAGCATTCGCTGACAACACTAGTTGGTGCGAAAAAGATC  
ACGATAGGACTGATAAAATAAATTTGGGGGAGTTAATTATACGAGCAAAACCCACTATCAATTCACAACCT

> **LLOJ010535\_a** (>192 aa; >3 exons) | **EDITED (PARTIAL - N-TERMINAL MISSING)**  
IVEINLMNKEHLSPEYVKINPQHTVPTLDDNGFILWESRAIATYLSKAPGNSLYPTDPKIRALVDSRLYFDASNLFKARNIVFPILILGVKEVDLEKKQILYQAL  
EFMNTYLEGQNWIAADHPTLADLTLSSISSIYHAGANI SKFPNIMAWYKRCSLPGFEENETGAKAFGQAIKKNLGTGTWDD-

> **LLOJ010534** (>191 aa; >3 exons) | **EDITED (PARTIAL - N-TERMINAL MISSING)**  
IVEVDLINKAQLSPEFVKINPQHTVPTLDDNGFILWESRAIAAYLVSSKAPGSPLYPTDPKIRAVVDSRLYFDGNSLYPKARDIIFPILFLGVKEVDEGKKQILYQAL  
EFMDTFLEKGDWFAADHPTIADLSLLASFASIFHAGANVSKYTNILAWYKRCSLPGFEENEAGAKTFGQAVKGLGTMGNWD-

[ No exon 1 could be found upstream of either gene. Exon 1 of LLOJ010535\_a could be on the sequencing gap.  
Both genes could be isoforms, with missing exon 1. ]

##### LLOJ010533 - GSTX #####

>JH690204 reverse | **LLOJ010533** (pre-editing) | **LLOJ010533\_a** (post-editing)  
CTATCAATTCACAACACTGATCATTAGTCTTTGTTCCACCATTCAACTGACTAGTCTTCTGTCTTTGACTCAATTTGGTGTGAAGAAGCAAAGTTTTTAAATCAAAA  
GTGAGTTTAAATAATATCTCATAAAAGAAATTTTTTAAATGATTTTAAAGAGTTTTTGTGCGATTTTTTACATAAATACAGCTAACATA **ATGTCACCATTGAAGTT**  
**GTACCATTTTCCAATCAGTGCCTCTAGAGTGGCCCTTCTGACTATTCCGAATCTAAATTTAGATGTTGAG**GTAATTTTTCAATTGAAAAATTGAATTTTTATGTGA  
TTTATTGTTGTTGACAATTAATAAAACAGAAGAATTAAGATTTATTTAAATATAAATACATTTTTTCTATAGTAAGTACTAGGAGTAGATAGGTGACTAGGGAAATTTAT  
AGAAATGCGAGATTTTTATGAATTTGTAACCTTTATCAATTTTCGTGGCCTTTAATAAGAATTAATCCTCGGCTGTAGTGTAGAAATGAATTTTCGTAACCTTTAC  
GTTGATTTATTTATAG **ATCGTTGAAATCGATCTAATCAACAAAGCACATTTGTCTCCGGAATTCGTGAAATCAATCTCAGCACACCCTCCCAACTTTGGACGACAATGG**  
**ATTTATTTTGTGGGAATCAGGAGTATGCTCTCTATTTGGTCAACTCTAGATCTCCGGAAGTCTCTGTATCCAACAGATCCCAAACTTCGAGCTGTTGTAGACTCTCGC**  
**TTGTTCTTTGATGCATCAGTTTATTTCCAAAAGCAAGAAATCTCTTG**GTAAGGAATATTCCTCTGGAGTTTTTACTGAATTTCTTCAATTTTTTTCGTTTTCTTTTTTC  
AG **TTTCCAATCCTTTTCTAGGTGTAAGGAAGTTGATCCCGAATTTGAACGAAATTCCTATGAGGCTCTTGATTTCAATGAATACCTTTTTTGGAGGGACAAAATTTGGATTCG**  
**AGCTGATCATGTAACAATGCTGATCTGACGCTCCTACCTCTCGTTTCTGTATTATT**GTAGGTAAACTTTATTTACGGAGATGTTTTTTTTTTTTTAAATAAATTAAGGA  
TAGTTACATAATATACATTTTACAG **CATTTCTGGAGCAGCAATTTCAAATTTCCCAACATAGAGGCTTTGGCACAAGCGATGTGAGACTCTGCCAGGATTTGAGAGAAATGA**  
**ATCTGGACCAAGCAATTTGGGAAATTTGATTAAGGAAAAATTAGCAAAATACAGGCACATGGGATTA**GCTATAATGGTAGCATTCTTTATGTTTCATTTAGTAGAGAAT  
TTCTATAAAAAATATCTTTTTCTTGATATAAAACTATAATTTTCTATTTTAGAATTTTCATCGGTTTCATGTGCAATCATGACAATGCATAAAACTTAATTTCTTTTA  
TTAAATTTTCTTATCTAAATAAATAAGTTTTTCACTTGAAAATATTTTT

> **LLOJ010533\_a** (221 aa; 4 exons) | **EDITED**  
MSPLKLYHFPISAPSRVALTIRNLNLDVEIVEIDLINKAHLSPFVKINPQHTVPTLDDNGFILWESRAIALYLVNSRSPGSSLYPTDPKLRVAVDSRLFFDASSLF  
PKARNLLFPILFLGVKEVDPELKRILYEALDFMNTFLEGQNWIAADHVTIADLTLPLVSCI IHSGAAISKFPNIEAWHKRCETLPGFEENESGAKEFGKLIKELGN  
TGTWD-

##### LLOJ010532 - GSTX #####

>JH690204 reverse | **LLOJ010532** (pre-editing) | **LLOJ010532** (post-editing)  
GACTATAAATTTAATTTTTCTGCAACAAATAGTTTCAGTCTTTTCACTAGATCTGGAGTAGATCAAACATCTTCTCCTTAAAAGTCTTAGCTGGTGTATTTTAACTAAT  
TTTTTTGTAAGTGAATAAATTTGACTATTATTATCCAAGGATTTTAAAGAACATTTTCAGGAAAATTTACCCCAACAGTCTCAAATA **ATGGCTCCTCTAAAGTT**  
**GTATTACATGCCAATTAGTGTCCAGCCAGAGCAGTTCTCTTTAACCAATTCGGAGCTTAAAACCTAGACCTTGAG**GATATTTTCTTTCTAGAAAGTTATAATTCACAAGAAC  
TCTTTTTAAAATCATTTTTGGGGATTTTCTAG **ATCATTAACATGACATCTTAAAGGGAGAACAACTCACACCTGAATTCATTAGCATGAATCCCCAGCACATGATCCCCA**  
**CAATTGACGACAATGGGTTTATCTGTGGGAATCAAAGGCAATTTGCTGCTTACTTGGTCAACTCCAGAGCCCTGGAAATTTCTCTATCCAACCTGATCCTAAAATCCGAGC**  
**CCTGTTGATGCACGCCCTCTACTTTGATACATCCACCATTTTACBAAGTCAAAGGAAGTTTTC**GTTAGTTGAATTTAGTTAGTTAAAGCAACGTTTAAACCGTTTAACT  
TTTCAATTAATTTGATTTTCTTAAATTTAG **TTCCCAATTTTCGCTTTTGGGAGCCAAAACAGCTGGAGGAGAAAAGAATGCTTTCTATGAGACACTAGATCTCATGAAT**  
**ACCTACCTAGAGGGAAGAAATGGTTTCAGGCAATAAACCACATAGCTGACTTTGCACCTTTGGCTTCCCTTTGCAACTTTTGT**GTAAGTTTCTTTTAAAGATTTT  
TATTATTTCTGTCTAATTCCTTGAGTTAATTTGCAG **CATTCGGAGCTAATGTGTCCAAGTACAAGAACATCCTAACCTGGTATAAACAATGCGAATCCTTGCCAGGATTT**  
**CAGCAGAATGAACGGGGGCTAAGGAATTCGGGAATATGATTAAGGAGAAATTAGGCATAACCGGAACCTTGGGATTA**ATTTAATTAAGGCTCTTCGTGATTGATTTTTG  
GAAAATGATTTAAATGAGAATTAATTTGAGAAAATAAATTTTAGCAAATTTGAATTAATTTGGTCTCTTTTTCTTAAATTTTAAATTAAGATAAATAAGAGCA  
AATAAAGATATTAATAATTTAATCGTTGTATGTTTCAGCAATCAGTACTGCCTTTTCATG

> **LLOJ010532** (221 aa; 4 exons) | **UNCHANGED**





#####  
##### GST zeta #####  
#####

##### PPAI006902 - partial GSTZ (N-terminal; isoform A) #####

>AJVK01059004.1 reverse | **PPAI006902** (pre-editing) | **PPAI006902\_a-PA** (post-editing)  
TGCTAAAAGGGTTCAAAAAACGGCTTCAAAATTAATTACTCAAAGTACCACAACGCCATGAGTTTATCGGCGCGGATTTCAAAGGTTTTTCCACAGCAAACAGTAGAA  
ATGTCACAGTGATTTTTCACACCCCTCTTTTTCACGTATTTTAGCGAATTTGTGTGATATTTCCACTGTAGTTATCTATTGCAAGTTGCTATGGCAAGCATCAGTT  
GTAAATTTGGTACAGTTTTCCTGTATTTTATATTTTCTCTTGTCTTCTGGCCTGTAGATTGAGGTTATGTGTGTTTTGTGGCTTTTTTTCTTCCCGGAGCA  
TAAATGTTTATTTTCGCTTTTGTTTTATACCTCTCCCATCGTAGGTGGCTTGTTCATCTGCGATGGCAGGAGAGGTTGTGTAGCTTGACTTGTGGCATGAAAAAT  
CTAACAGCCGGCGATAGCGCTGATGACCTTGAGTAAAAATTTCTCCTAGATGACAATAAACAAAGCTTTCAGCCGGTTTTTGTATAATTGAGAGATTAGTATTTTTT  
TATTTCTCCGGCTTGAATATCACCTCAATGCATGATGCCTAATCTTCAGTCTTGGCCAAGTCGTGGAAGTGTGCTATTCTGTTTTGAAATATTTTGCCTGAAGAGA  
AATCCAGAAGTTTCAATATCGCAATC**ATGTCCAATTCGCAGCCGATCTACTCATCTAGTTCGTGCTCCTGGCGTGTCCGGATAGCACTCAATCTTAAGG**  
**GATCCCTACGACATAAAGCCATCAGCCTTATCAAGCGGGCGGGAGCAACTGCAATGAGTACAG**GTAAGAAGAAGTTGTTTTACAAAAAGAATATGCTCCTATA  
TGCAATCCAGCGTCAAATAAGAAAGCCTTATACCTATAAGATTATTGTGCCAGGAAACAAGTAACCTAGAGGAAAGTTAATTAGCTGCATGCGAGTTACAAAGTAC  
TAACAAAATAAACAAATTTCTCAACAAAGAATAGGGGAGCGTCAAAACCTTTGTAATTCACAAAAAACACACAATTAAGAAGTACAGATAAAAATAGGAAGAACTA  
CAGCGAATTTGAGCAAATTAGCTTCAATAATTAACGTGAAAAATTTGCAATAAAAATTTTTCGCCTGATTGAAAAAGAGCCGATTAAGTGAGAGTCTACTGTACAACCTT  
TAAGGACCGTAAAAGTACTCGCTACGGATAAGTGGCGCTGCCAGTGAGCACCAAATGTTAACCGATTTCAATTCAACTGAAAAATATATGATTTTTCAGCTGAATTCT  
GCTAATCTTAAAACAAACTCACGAGCCAGTGCATTTCCATACATTTGATTAGCATTTTTTGTTTAAGAACTGCTAACCGTCAAGTATTTTGTGATCGATTCA  
GCACAAATATGCTGAAAACGCTGCCTTTTTAGCTGTGTGCTCGTGGATGGACTATGCATTCAAATCAAGGGTAACTCATATTGAGAAACCCCTCGTCAATTTGCCG  
AGAACGCTTCGCGAAACCCGAGAAACCCAAAATTTGCATCGCGAAACCCGAGAAACCCAAATTTCTGCATCGCGAAACCCGAGAAATCAGAAACCCCTGTGCAAAAA  
ATGGGAATGAGTTACCCCTTGGGGGCGAAATGTCATCCGGTTTATCGATAGATTTGTCAATTTGGGCATTTGAGAGAGAGACTACTGTAAAGTCAATACAAGAACTAAA  
CAAGGAATAGCATAACCTAGTATCTACATTAAGACAAATAGAGGGTAAAATTAACCTGTTTTATCATATAATATACTTTTTAAGTTTTAAGCATAACAACACTTTT  
TTCATGTTAATTTAAAACCTGTTAAGGGTAAAATTCGCATTACCAGAATGAAAAGTTTAGACATGGTTTTTGGTCTGGTTTAGACCGTTAGGGTGCATTTGACCGT  
CATTTGTACAATTTTATTTAGATTTTTATGTAAGGTAAGGATATACCCATTTTATCCAATTAATAATCTCATTACCTGATTAACGAAAAAGCGTTCTCGAAATGTCTG  
TGAGTTTGGAAAGGAATAATCTAAACTAAACCCGTAATCCCGAAGCCAAAATCCAGAAAAGTCAAAATCCCGAAGCTAAGGTCCCGAATGATCAAAATCTCGAAAGG  
GACGAAATAATAAGCAGGATAATGTGTGAAATAATTTCCCAAAACAGAAAATTTCTTTTGTCTCCAAAAGTGGCGGTGCACACGTTAGAGTGGCTGTGAGACTTTT  
TAAAATTTGAAGCTTTTGGGTTCAAGAAAATCTCCAGCATCGACTACGAGACCAAGAGATAGACCACCTAAAAGGTGGTATGAGTCTGGATATCAGAATCAACA  
CCTGTGATGCTAAGTACCATCAACCCCTTCAAAATCAACAGCAGGCAACAATCCGTAGCTAACCTAGCTGGGAAAAACAGCATTTTGTCTAATTTAAGTGAAGAG  
AAAAGAAAGATTTAGCTTTTCGGGATTTTGACCGAGACTCAATCTAAACAGATCGAAGACTATGTTCTAAATTTTCGTTAACTTTAACTGACTAACTGTCTCTATT  
AACCTATAAGGATCAGTAGTATACCGGTGTCCTAAAACAATTTTTTTTTGCTTTAGGAAGTCAATGCTCTTAAATAGGTTTTGTTTTGCTTGTCTCCACTGTGTT  
TGTTTGTCTCCACTTGTCTTAAAAGTTTTATTAGAATTTTTTCTACTTACTCGAATTCGAATAATCAATGAAACTCCAGATACGTCTAATTTTACTAAAAAATA  
ATTGTAATGGTCCAGGATTTAAAAAATCTGTTCTCTTTCTACGGTAAGGTCAAGAAGTTACAAAATTTTATTTTCAAAGCACACTGTGAATGATGAGACTTAG  
CTGGGTAGAAGCTTATTGAAAATTTAGAAAACCGGTTCTTCCATAACTTTGAAACGGTCAATTTTGAATTTACGAGTACTTTTCTGTAGATAGAACAGCACCAGAA  
GGGACGTTTTTCGCGTGGAGGGGAAGTCACTTGGTTAGAGCGAGGAAGAGGATGCATTCGCTTTGTATCCTGGGTCTGATAAGAATGATAAATGCACATCCCAA  
GGCCAGGGCAACAAATGTCATATCTTAGTTCAGGGTTCGAGTTATAGAGCAGTCCGAAAGCATTCCAAATCAGGATCTTTAGCTATTTAGGCTTTATACAAAA  
ATGCACTTATAGACTTTTTGCGATCTTCCGTGGTGTCTTCCCAAGATTATCAATGAATTTTAAAGTCCGAATAGGGAATTTACGAAGTTTCATTATGAATTC  
GATATCAAGTTGTTATTTTCTTGTAGCATTAAATAAGGAGCTGATCCAAAGTATATACTCGCCCTTTATAAACAATAATGTACCGTAAGTGCAGCTGACTTTGA  
CACCCCTGTTCTGATGCTTCTCTTACTTCTAGAACTTAAGGATGGTCTTTACCGAATCGATCTGCCATGTTGATCAGTAAAAACAATCCTTAGGTTCTAGAAAT  
AAACATAAAAGATTACGAACAGGGGGCTGCCAAAGTCAACCTCAAGGGACAAAGTTCTCATGAGAAATACTAATATCGTAAAATTTATATACATCACTGATTAATAG  
TAGCACATTTGTTCTGTACTTATACAGCGCGTGTGATGAGTCTTATAGATCTAATCACATTAGTGTGAAAAGAAGCATATTGTGCTTATTTTAAACCACGAACATGC  
TTGATATTAAGAGATTAATATAAATCTGTGCTAAACAGTAGTGCAATATCTTGGAAATTTGTATGTGAAGTATGATGATAATCTTTAGTTACTACGGTGTCTGTTA  
GAGGATTTGCTTTTTTCTTAAAATAAAAAGACTCAATTTTTTCTAGAGCTTTCAACCTTCGGTATTTGTATTTATCAGTAGGTTGGTTATAATCTTCAATGATTTGG  
AATCTCTCGTCACTAGTATTTGTGCGAAATCTGATTCACAGGAAAAATTCATACTGGTGATCGAAAGCTCTGGAGAAAATGAGTCTCTTTGATTTGAGAACAGAAG  
ACAGTCTTGTAACACTPAACACTGGAAGTCCGAGCATTTCAGTAGTATGCTGTGTAATTAATTTTAAAACCCGTTTAAATTCAGTGATTAATAATTTATTAATGCTC  
AATTTGAACCTGCATCTACGGTATGTACAAAAAATTTGAGAAGGAAAGTTTTCAGCTTGGCAGTACTCTAGCTTCAACATTTTATATTTTCCCATGTTCTCTTTA  
ATGAATCAGAACAATCTTATATAAATATAAATCAATAATCTGTATTTTTCGAAAGTAGTTCAAGGTGTAACCTACCCTGAAACCCATAATAAACACCTTTA  
TTTGTAGTATACTTCTTAAATTTCAATATAATCACAGTAATGTCCGCAATGGTATTTAAATTTTTATTTATTTATTTGATTTACAAAAGTGTATTTTGAACCA  
TCAAGTTGGTACTTTCAAGGCCAGGTTTTACACTTACATGTGTTAGAGTAACACATGAATTTCAAATTTAGTATAAGGATGGCACATTTGAGTGAATGTCAAGCAA  
TTTGGAGAGTAAATGCCCAAAGCATGTCTTGTAAAGGATTTTTTCTCAGTGAATGTAAGAGAGCTTTCCAGGGGGTTGAAATTCGTGCCAGCGCAAGTTGATGATAA  
AAATGAAGTCCGAAACTCTTTATAAATGTTTAAATAGTTTCCCTCCAATGAATTTTTTTATGACGCTGTATTTTTCAG**TCGGTCTCCTTACGTGGATCTCTCAAT**  
**GGGATAGCCGAAAAAAGGGGCGGATGGGTCACACCAGGTGA**AAATGGACGATGTGGTGTGCTGGAAGAGGCATAACAAGATGATGAAGGTGGTGGACGTTGCATGCT  
AGTAAATCGCCCTCATGCAAAGGTACATAAACACTATCAGCATAATCAACAGCAAACAATTCCTTCGCAACACTTTTTGCACCCTGCACCCGTTGGGCAACACG  
GGGTGAGCTTCCATAAATGAAGTTTAA

>**PPAI006902\_a-PA** (>50 aa; >1 exon) | **EDITED (PARTIAL GENE - C-TERMINAL MISSING)**  
MSNSQPILYSYWRSSCSWRVRIALNLKEIPYDIKPISLIKAGGEQHCNEY

##### PPAI006902 - partial GSTZ (N-terminal; isoform B) #####

>AJVK01059004.1 reverse | **PPAI006902** (pre-editing) | **PPAI006902\_a-PB** (post-editing)  
TGCTAAAAGGGTTCAAAAAACGGCTTCAAAATTAATTACTCAAAGTACCACAACGCCATGAGTTTATCGGCGCGGATTTCAAAGGTTTTTCCACAGCAAACAGTAGAA  
ATGTCACAGTGATTTTTCACACCCCTCTTTTTCACGTATTTTAGCGAATTTGTGTGATATTTCCACTGTAGTTATCTATTGCAAGTTGCT**ATGGCAAGCATCAGTT**  
**GTAAATTC**GTCAGTTTTCACTGTATTTTATATTTTCTCTTGTCTTCTGGCCTGTAGATTGAGGTTATGTGTGTTTTGTGGCTTTTTTTCTTCCCGGAGCA  
TAAATGTTTATTTTCGCTTTTGTTTTATACCTCTCCCATCGTAGGTGGCTTGTTCATCTGCGATGGCAGGAGAGGTTGTGTAGCTTGACTTGTGGCATGAAAAAT  
CTAACAGCCGGCGATAGCGCTGATGACCTTGAGTAAAAATTTCTCCTAGATGACAATAAACAAAGCTTTCAGCCGGTTTTTGTATAATTGAGAGATTAGTATTTTTT



TATTTCCTCCGGCTTGAATATCACCTCAATGCATGATGCCTAATCTTCAGTCTTGGCCAAGTCGTGGAAGTGTGCTATTTCTGTTTTGAAATATTTTTGCCTGAAGAGA  
 AATCCAGAAGGGTTTCATAATCTGCAATC**ATGTCCAATTCCGAC****CCGATACTCTACTCATAC****TGGCGTAGTTCGTCTCCTGGCGTGTCCGGATAGCACTCAATCTTAAGGA**  
**ATCCCTACGACATAAAGCCCATCAGCCTTTACAAGCGGGGCGGGGAGCAACACTGCAATGAGTACAG**GTAAGAAGAAGCTTGTTTTACAAAAAAGATATGCTCCTATA  
 TGCAATCCCAGCGTCAAATAAGAAAGCCTTATACCTATAAGATTATTGTGCCAGGAAACAAAAGTAACAGAGAAAGTTAATTAGCTGCATGCGAGTTACAAAAGTAC  
 TAACAAAATAAACAAATCTCAACAAAGAATAGGGGAGCGTCAAACCTTTGTAAATCCACAAAAACACACAATTATAAAGAATCACGATAAAAATAGGAAGAACTA  
 CAGCGAATTGAGCAAATAGCTTCATAATTAAACGTGAAAATTTGCAATAAAATTTTTGCGCTGATTGAAAAAGAGCCGATTAAGTGAGAGTCTACTGTACAACTTT  
 TAAGGACCGTAAAAGTACTCGCTACGGATAAGTGGCGTGCCAGTGAGCACCAAATGTTAACCGATTCAATCAACTGAAAAATATATGATTTTTAGCTGAACTTCT  
 GCTAATCTTAAACAAAACCTCAGGAGCCAGTGCCATTTCCATACATTTGATTAGCATTTTTGTTTAAAGACTGCTAACCGAGTCAGCATATTTTTGCTGATCGATTCA  
 GCACAAATATGCTGAAAACGCTGCCTTTTTAGCTGTGTGCTCGCTGGATGGACTATGCATTCAAATCAAGGGTAACATATGAGAAACCCCTCGTCAATTTGTCGG  
 AGAAACGCTTCGCGAAACCCGAGAAACCCAAAAATTGCATCGCGAAACCCGAGAAACCCAAATTTCTGCATCGCGAAACCCGAGAAATCAGAAACCCCTGTCCAGAAAA  
 ATGGGAATGAGTATACCCCTGGGGGCGAAATGTCATCCGGTTTATCGATAGATTGTCAATTTGGGCATTTGAGAGAGAGACTACTGTAAAGTCAATAACAAGAACTAAA  
 CAAGGAATAGCATAACCTAGTATCTACATTAAAGACAAAAGAGGGTAAAAATTAAGTGTTTTTATCATATAATTATACTTTTTAAAGTTTTAAAGCATAACAACACTTTT  
 TTCATGTAAATTTTTAAACTTTGTTAAGGGTAAAATTTCGATTACCAGAAATGAAAAGTTTAGACATGGTTTTTGGTCTGGTTTAGACCCTTAGGGTGCATTTGACCCT  
 CATTGTACAATTTTATGATTTTTATGTAAGGTAAAGGATATACCTATTTTCAATTAATACTCATTACCTGATTAACGAAAAAGCGTTCTCGAAATGTCGT  
 TGAGTTGGAAAGGAATAACTAAAACCCGTAATCCCGAGCCAAAATCCAGAAAAGTCAAATCCCGAAGCTAAGTCCCGAATGATCAAAATCCTGAAAGG  
 GACGAAATAAAGCAGGATAATGTGTGAAATAATTTCCCAAAACGAAAATTTCTTTGCTCCAAAAGTGGGGTGCACACGTTAGAGTGGCTGTGAGACTTTTT  
 TAAAAATGAAGCTTTTTGGGTTCAAGAAATCTCCAGCATCGACTACGAGACCAAGAGATAGACCACCTAAAAGGTGGTATGAGTCTCGATATCAGAATCACAACT  
 CCTGCTGATGCTAAGTACCATGCCCTTCAAATACTCAAACGACGGCAAAACATCCGTAGCCTAAGTGTGAAAAAACAGCTATTTGTCTAATTAAGTAAAGGAAG  
 AAAAAAGAAGTTTTAGCTTTGGGATTTGACCGAGACTCAATCTAAACCAGATCGAAGACTATGTCTAAATTTGTTAACTTTAAACTGACTAACCTGTCTCTATTT  
 AACCTTATAAGGATCAGTAGTATACCGGTGTCCTAAAACAATTTTTTTTGTCTTAGGAAGTATGTTCTTAAATAGGTTTTGTTTTGCTGTCTCCACTGTGT  
 TGTGTGCTCCACTGTCTTAAAAGTTTATAGAAATTTTTCTACTTACTCGAATTCGAATAATCAATGAAACTCCAGATACGTTAATTTGACTAAAAAATA  
 ATTGTAATGGTCCAGGATTTAAAAAATCTTGTCTCTTCTACGGTAAGGTCAAGAAGGTTACAATTTTATTTTCAAAGCACCACGTGAATGATGAGACTTAG  
 CTGGGTAGAAGCTTATTGAAATTTAGAAAACCGGTTCTTCCATAACTTTGAAACGGTCATTTTTGAAATTTACGAGTACTTTCTGTAGATAGAACAGCACCGAA  
 GGGAACGTTTTTCGCGTGGAGGGGAAAGTCACTTGGTTAGAGCGAGGAAGAGGATGCATTGCGCTTTGTATCTGGGTCTGATAGAATGATAAATGACATCCCAA  
 GGCCAGGGCAACAAATGTCATATCTAGTTCACAGGGTTCGAGTTATAGAGCAGTCCGAAAGCATTCCAAATCAGGATCTTTAGCTATTTAGGTCTTATACAAAAA  
 ATGCACTTATAGACTTTTTGCGATCTTCCGTGGTGTGCTTTCACCAAGATTATCAATGAATTTTTAAAGTCCGAATAGGGAAATTTACGAACTTTCATTTGAAATTC  
 GATATCAAGTTGTTATTTTTCTTTGTAGCATTAATAAAGGACGTGATCCAAAGTATATACTCGCCCTTTATAAAACAATAATGTTACCGTAAGTGCAGCTGACTTTGA  
 CACCCCTGTTCGTATGCTTCTCTTACTTCTAGAACTTAAGGATGGTCTTTACCGAATCGATCGCCATGTTTATCAGTAAAAACAATCCTTAGGTTCTAGAAAT  
 AAACATAAAGATTACGAACAGGGGGCTGCCAAAGTACCCTCAAGGGACAAAGTTCTCATGAGAAATACTAAATATCGTAAAATTTATATACATCACTGATTAATAG  
 TAGCATTGTTCCCTGACTTATACACGCGGTGTGATGAGTCTTATAGATCTAATACATCACTTAGTGTGAAAAGAAGCATTATTGCTTATTTTAAACCCAGAACATGC  
 TTGATATAAGAGATTAAATAAACTGTGTGTAACAGTATGATGATCTTGGAAATTTGTAAGTATTTGTAAGTATGATGATAATCTTTAGTACTACCGGTGTTGTTA  
 GAGGATTTGCTTTTTCTTAAATAAAAAAGACTCAATTTTTTCTAGAGCTTCAACTTCGGTATTGTATTATCAGTAGGTTGGTATAATCTTCAAATGATTTGG  
 AATCGTCTCGTCAAGTATGTTGCGGAAATCTGATTACAGAGGAAAAATCATACTGGTGTGCGAAAGTCTGGAGAAAATTGAGTCTTTGATTGAGAACAGAAG  
 ACAGTCTGTAACTAACTGGAAGATCCGAGCATTTCAGTAGTATGCTGTAATTAATTTTTAAACCCGTTTAAATTCAGTATTAAATTAATTTAAATGCTC  
 AATTGAACCTGCATCTACGGTATGTAAAAAATTTGAGAAAGGAAAGTTTTCAGGCTGGCACGTACTCTAGCTTCAAACATTTTATATTTTTCCCATGTTCTTTTA  
 ATGAATCAGAACAATTCCTATATAAATATATAAATCCAATAATCTGTAATTTTTCGAAAGTAGTTCAGGTGTAAAACCTACCCTCGAACCCATAATAAACACCTTTA  
 TTTGAGTACTTCTTTAATTTCAATATAATCACAGTAATGTCGCAATGGTATTTAAATTTTTATTTTATTTATTTGATTTACAAAAGTGTATTTTGAACCA  
 TCAAGTTGGTACTTTCAAGGCCAGGTTTACACTTACATGTGTAGAGTAACACATGAATTTCAAATTTAGTATAAGGATGGCACATTGAGTGAATGTCAGGCAA  
 TTTGGAGAGTAAATGCCCAAGCATGCTTGTAAAGGTATTTTTCTCAGTGAATGTAAGAGAGCTTTCAGGGGGGTTGAAATTCGTTGCCAGCGCAAGTTGATGATAA  
 AAATGAAGTCCGAAACTCTTTATAAATGTTTAAATAGTTTCCCTCCAATGAATTTTTTTATGACCGTGTATTTTTCACT**CCCGTCGCTCCTTACGTGGCATCTCTCACATT**  
**GGGATAGCCGAAAAAAGGGGGCCTAGGGTGCACCAGGTGA**AAATGGAGATGTGGTGTGCTGGAAGAGGCATACAAGATGATGAAGGTGGTGGACGTTGCATGCT  
 AGTAAATCGCCCTTTCATGCAAAAGGTACATAAACACTATCAGCATAATTCACAGCAACAAATTCCTTCGCAACACTTTTTGCAACCCTGCACCCTGGGGCAACACG  
 GGGTGTGCTTCCATAAATGAAGTTTAA

>PPAI006902\_a-PB (>53 aa; >2 exons) | EDITED (PARTIAL GENE - C-TERMINAL MISSING)

MASISCKLPILYSYWRSSCSWRVRIALNLKEIPYDIKPIISLIKAGGEQHCEY

##### PPAI000943 - partial GSTZ (C-terminal) #####

>JH662192.1 forward | PPAI000943 (pre-editing) | PPAI000943\_a (post-editing)

CACTTTCGCTTTTTGCATGTCTATCAAGGCACCTGCAGGGTTCAGGTGGCCAAATACCTACCAATAATGAATAGATAAAGATCTTTAATAAGAGATTGCATGA  
 ATGACTATTTCCCTTGAATGTGCGATTGGTCAAAAATATCTTTCAAACATAAGATAAAGAATATTAAGAGAAGAAAAATCTATCAATAG**ATGGACACACGCTGAT**  
**TGAGTCCCTGTCAATAATGCATCTCTGAGGAGACTCGTCCGAGAGACCACTTCTCCCCAAGATGTTCCACAAGAGAGCGAAGGTGCGTGAGATATGGGAAGTGTGC**  
**ATCGGGTATCAACCCCTTCAGAAATCTCGTTGTGCTCATTCACTGTTGGGGGAGGAGAGAAGAAGAAGGAAATGGGTCCAACTTTGGATAACTCGTGGCTTTAGGGCCATTGAGAA**  
**CTCCTTTCCACTTCTGCTCGAAAAATTCGCGTAGGTTGATGAGATCACAATGCGAGATTCCTGTCTTGTGTTACCTCAAGTTTTCAATGCTAGACC**GTAAGTTTTATTAGCTTTT  
 CAAACTCTGGGAATTAATTCAAGATTTTGAATAAATTCATCAGCATTGATGAAGATTCTTGAATGCTTGAATTAACAAAAACCCATCAACACTCAGTTGACTGT  
 TTCAGTTGTTTTAGATCTGTTTCACTGTATTTTTGTCCCATGAGAAATTAATGCAATAATGACGCGGAGAGTATGATCAGGTGAAGAATAAGATTAAGTGGACAT  
 TAATATAATTGATAATTTGCTTGTCTAGAGGTTGTTAAGTCTGTGCTAACAAAGTGTTTAGCCAAAGAAATGTTTTATGTTCAAAGTCTTAATTTGTCTAAAGTT  
 GTCTAAAAGTGTGTAACCTCAATGTACCATTAAGACATCATCTTGTCCCCGATTAAGACGAGAGCCAGAAAAGCCTAACATCTTCAACACTGAGAAATGTGAG  
 AGAGACCCGAAAGTCTTGAAAGAAAAGAAATATTTCCTGGCTGAAGCCTTCCACTCCGACAATCAGGATTTGTTCTTTGAATTAATTAACACTCAACACTCGGTTT  
 CCTACATTTATCATTATTTGCTGTAGGGGAAAGTACTCTCCCTTGAACGTTTCAATGCTTCGAAATAATGTAATTTCTTTAATGTTTTCTAGACTTACACATATTA  
 TGACATAATATCAATAATGATAAAAAGCTAACTAATATTCAGTCGAAATGTGTAATCTCTTAGAAAAATAAAGAAAAATTTACATTATTTCAAGGCATGAACGTT  
 TCCAAGGAGAGTACTTTTCCCTACTTCTATGCGCACTACAGAAAAATACTGCCATAATAAAGTATTTGACCACACTAGTCTATAAATCCAAATAATTTTTTCTGT  
 GAGACACTCGGTACATAAAACCTGATCATAGAAGATGTAGCACTATTAAGGTGCGGAGTAGGGTTAGCAAAATAGAAACCTTCTCCCTGCCCCGACTGTGCTT  
 TTGACTCCATTGAGTGGCTGAGAAAAGAACAGGTTAAGGTTATCATGGAGGATACCATGTTGCCATGTGAATAGAGAAAAGGATGGTCTAAGAGTGTTCCTAGGACC  
 ATGTAGGAAAATATGAGCGTTTTCTTCTTAAATGAAGGTTGTAGAACACGATCTTTGTTCACTGATGTCCATAGTTGTGAGACATGGGCTGCAGTAAACAAGAC  
 AACTTTAAATGTTGAAAGGCTAAACTGCCAACTACCGTTTGCATGACCTCTCTTGCTCACCTAATATGCACATAGCAATATAGAAGATTTAAGAGTGGTTTAT



GC GCAACGATTGATGCTCTGTCCAGCTTCGGCTTCGCTGTTCCCTGGAGACGCTCACTGAGGCAATTAGGCAGGGATTCTGATCCCAATCTCCTGGGCTCGTGATTG  
ATGGCATCACGAGCTGACTGAGCGGAATCTTTGATGGCTGTAACGGAGTCCCATGCTCTGTGCGAGGAAACTCGATTAAAGTCAGCAATCTCCTCGGAAGAATCCAGG  
CGTTGATTGCGAAGGAAGTAGTTGAGGTGCTAGTGAAGTCCGTAAAAATCCCAGTGAATGCTCGCAGTTCCCCCGCAAATTGACTCTAAAATGAACAAAAAAGGAA  
ATTCTTTTGAATTTCTCACTTTCATGAAGGGAAAAGAACTCACATTTGCAGCAGCAAAGGCAAAAAAGGCCAGAAAGAAAGGAGAACCTTTCATCTGAATAAACTT  
CCACCCCAATGAGACAATGAGCTCAAGTGAATGCCAAGGGAAAAGCACTACTGAACTACTTTTTCGCAACATCTCGCACTTTTCGATATGACTTTATCACAAAACAT  
TTCTACACATTAATTAATTTGGGAGATTTTCATTGATTACCCACAACATGGGCACAGCTGTGTGATTGATTCCCTTTCATTTCTTGCATAATAAATGGAC  
TGTTGAAGGAAATAAAGTACCTGTGAGTTTCTGGAGCTCAATGTTATTTTCACACCAAAAAAATTGTGCAGATTTAGCACCGTCAAAGCAATTTAGAGCAACAT  
CAATGCAGGAATTAATCCACACACTGGAGGGATTTATTTGAGTAATTTGCCACATGCAAAGGATTCAATGTTAATAGCTGCAATTTGCGGTTGGTTTACATCAAGCTTCC  
CTTATCCATTGAAAATCAATTTACCAAATGAATGCAGCTTTTGCTATAAATCAAATCCATTAAGTTTTATATGATTTATGATGTGAATTTATCAAATATAAAA  
GCTTTTACAGGTTTTAAATGAAGGAAATAGTTTTAACAGAGAGAGATTAATTTGAGCAAAGAAAATTAATAAGAGTCTTTAATATGCGATTGGGCTCTAGAAGTTT  
TTTTTTTACAGAATCTACTTCAATTTCAATTTGAGGAATATTTTATTTTAAATTTTTTTTTTAAATTAATTAAGAAATTTATTTTCTCGGTCATTTGCAAAATAAAAAA  
AATGAAAACACAGAATGAGATTTTATCTGAATTTCTTTTTTTCTATTAAAAATAGAGAGAAAAAATTTGTAAAGAAATCCGAGAGAAAAACTTCTTCTCGTTCAG  
CAATTTTCATGTAAGCAAGCCGAGAACATAGCTAACAGATGGCGCTGACTTTTACTTGTCTTTCTATGACAGTTCCGAGATTTTTATCTCCTTCATCAGGTCCT  
CAATTTGAACATATAGCTAATTTTTTTTATAGATTTGTGAGCAATCAATTTTGAAGAAATTTGTGTTCTCTTGTCTCAATTTAAAAAATCTTTCTATATTTAATTTT  
AACGGCTAAGTTAAACCAACAGAGAAAAGAACTTTTTTTTTTAAACGGTGTGATTAGCTAGAAAATCTTTAGAAAATTTACATTTCAACAAAATAGTTTCT  
TTCTGAAATCAGTAATAACTTCTAGCTTTCTAGTATAAATCTCATCAATATTTTCACCCATAAAAATTTCTCGGAAAAAATATTTAACATGAAAGCTATTTTTTT  
GATCTAAAATCATTTTTTATTTGATGTTTTCTAAAATAAAAATTTTCTGCTGCCAATTAGGAAAAATAAAATTTAAAAAAAACATTTTTTCTCTAATATAATCCAT  
TTTTTATTTTTTATCACCGTATTTGTTTTCATAGAAAACGTTTTTGTAGTAAAGCAAAACCCGAGAAGAACTTTCGCGTTGCAATTTTTTGGGTATCTAATGAGCATGCTAAC  
AGTGGGAGAGATCATCCCTCAATTTGGTTTACATCAATGTTGTAGAGATTAGCCACAATAAGGAGGCAGTTTCCATGTTGATGTTGCCCGTGGTCTTGCCAACTCTA  
GCATGTCGCGGTAGTAGTTGATGTAGTACTCATCGCGGATGTTCTCGCGATGATCCAGTTCTCTGAAGCTCGAAGCGGATGATGCTTGTATTGTTGACGGCATTGT  
AGTGTCCAAGGGTGTAGAGGACGAGGAGTTGGAGGAAGTGGGACATACGCTGAGCGTAGTTGATGTGAATGAAGAAGCCATAGTCGAGGGCATGCTGGAAGTCACGGT  
GGAGTTGCGAGAGCAGCTGCTGATGCTCACACCGGCTCTTCTCGAGATCTGCCAATCGTGTGCGGATTTGAGCAATGCAGGGATTCTCTCCACCTCGGCAGCAT  
GATTGTCAATGGCTTGTTCAGCACTCACGGTGTGAGACGGAGGCTGTTACGTCAATCCAACTTGTCTCAAGAGCTACACGGTTGGCTGTCTGATGCTGCTACTGA  
CAAGAAGCGTTGATCCCTAAGCCAGTAGTCCACCTCCTCGTGGTATTTCATCGAATCCCTGTGGAATCCCTCAATTTCTTGAAGAATTTGTGCCAAAATTTGAATGAA  
TAAAAATCCCATTAAGTCATAAAGTCATTAATTTGAAAATGCAGCAGATTTTCTTACCTGTGCCGTAGCCACAACCCAGAGCAATGAAAATGCAAGGACCTTCATGG  
TTGCTTGTATTCTTTTCCAGAGAGAATTCCTACCCACAGTTCTTCTCGGACGGTGAATAATGGCAATGGTAGCACAGATCGTGTGCAGGGTTCGCAATTTTATTC  
AATGAACAAGGAGGGGACGAATCTCGGTGAGAAGGAGACACAATCAACGAAAGGAAAATCAACCATGTTCAATCTCAACGCGATAAGATGTTTTCGTTTAAATTA  
CAAAACAATTTCTGCTCTCTGCGAGTACTGTTGGGGAGGGCGCTTCTGCTACCTTCCGTGCCACCTGCAGAGAAATCAGGTGGCCAAATTTGGCGCAATCCCAAC  
AAGAATCCCAATATAGATGAATGAATGAAAATATTTCCATCGTCAATCTTTTTTCGTAGAAAATTAATTTTTTGTGAAATTTTTTGGATAAAAAAATTTGTAG  
**AT**  
**GGACACCGTTGATTGAAATCGCTCTCGATAATGCATTATCTGGAGGAGACGGCTCCCAAGGACACTCTCGCCGAGGATCTCCACAAGAGGGCAAAGGTGCGTGAAATTT**  
**CGGAGGTGGTGCATCGGAAATTCACCGTTGCAGAAATCTCGTTGTTCTCATTCATGTTGGGGAGGAGAAGAAGAAGGAATGGGCACAGATGGATCACTCGGGCTTCAG**  
**GGCCATGAGAAGCTCCTTCAACATCTGCTGGCAAATCTGCGTTCGCTGATGAGATCACGATGGCAGATTGCTGTTTGGTACCCTCAAGTTTTCAATGCTAGACG**  
**GTAATTT**  
**ACCTTTGACAAAAGAAATCTTTAAGTTTTCTTTAGAGAAAATTTGTTATAAAAATGTTTTTTTGTGGTTTCAG**  
**ATCCACGTGGATCTTAGACCTTATCCGATAATTTTCCG**  
**ATCGATCGCAATTTGGAGAGCCATCCGGCATTCCGGGCTGCTCATCCATCAAAATCAGCCAGATTGCTCTCCGGAAGCAGCCAAATA**  
**ACCTCATGCAACTGCAAAAATGAAA**  
TGAAAATCAGGTTCAAAGTAGAGCTCAACTCTTCTCTGTTTCTTTTCAGCTCTTTGCCAAGAAAATCATTTAAAGGAATTTTTTAAATTTTTTAAATGAAGACAC  
TTGATCAAAAATTTTTGATTGATGAATTAATGATACATTTAGTCCCTGTTTCTATGCAATTTATTA

>LLOJ000305\_a-PA (216 aa; 4 exons) | EDITED

MSNSQPIILYSYWRSSCSWRVRIALNLKEIPYDIKIPISLIKAGEQHCHNEYREVNAMQVVALQIDGHTLIESLSIMHYLEETRPQRPLLPQDVHKRAKVREICEVVAS  
GIQPLQNLVVLIVHVEEKKKEWAQHWITRGFRAIEKLLSTSAGKFCVGDIEITMADCLVLPQVFNARFHVDLRFPYPIILRIDRELESHPAFRAAHPNSNPDPPEAAK  
-

##### LLOJ000305 - GSTZ (isoform B) #####

>JH689424 reverse | LLOJ000305 (pre-editing) | LLOJ000305\_a-PB (post-editing)

TTGATGTTTGGAGTTGATTCCTTCACTCTTTAAAATGATTTTTTTTTTAAATTTTATCAAAAATTTATTTTGGATTTAGAAAGATCAATCAATCTGCAAACCTCT  
CACATTTTATATTTTAAATAAATTTTAGATTTCTTTCTATTCTTATTTCCGGCAATTTTATAAGCACTGAAGATCATTGAGAGAGCGATCTATAATTTTGCAAAACAT  
TTTATGATCAATGCAAGATCTAACGACTTTTATAAACTTTTTAATTTAGATAACATTTTTTATGATGTTACAGGATTTTAAATTTGATCACAAAGATCAGGAAATAAC  
TGAAAATTTACGATCCAGAATTTCTTCTTAAAGATCGCATTAGATCGCGGTTCAAAAATATGCAATACCTAATTTTCTTATTTAAAAAGATTTAATTTTATA  
AGATTTCTTTAAATAATTTTTTATCTTAAAATCATTTAAAACCTTAAAACCTTCAAAATCTCACATCAGCACCCGTAAGTACCCAGAAAGTCCCAAAAATACATTT  
CATTCTCAAAAATTTGTCGAAAAACAAGAAAATCGTATTTTGGAAAAGAAAAAACGTTAAAGTCAAATCTCAGCAGTTTTTCCATTTTCGAATTTTCGAAAGC  
CGATAATTGCCGATAATTACCGAGAAAAGCCGAAGTTGCCCGAAAGAAGGAGAAGGAAGAAAACAAGAGAAAGTTTTGCCGATTTGTAAGTGAATTTTTTCGCT  
AAAAAATGTATAAAAGCCAAAGCAATTTGGCTGTGCTTTTTGTGTTAAGCAAGTCAATAAACCGCTTCAAAATTAATTTACTCAAGTATCACAAAGCCATGAGTTTA  
TCGGCTCGGATATCAAAGTTTCTCCAACAACAGAAATGTCATCGTATTTTTCTTTCACGCCCCACCTTTTTATCCCGTATTTTATCGAGTTTGTGTGATATTAT  
TGCTGTAGATTATATTTTGAAGTTATT**ATGGCAAGCATCAGTTGTAATTTG**GTACAGTTTCCAATGATTTCAATTTTATTTACCTCTGTTTTCCCTGTTTGTCTGTTG  
TTTGAGGTTATGTTTGGCTTGTTTTCTTCCGATGCTTTGTTTTGCTTTTTTCCCTCTTCTGCCTGCCCGGCTCCAGTTTCCGGGGAGGTGCTGCGAGAGG  
AATGCGCCAGATCACCACGCAAGAAGCACGACGATAAGGCTGATAACCTTGAAGGAGAAATTTCCACCAATCAATGCGAGAACAAGCTTCCAGCCGGTTTTTTGCAT  
AATTCAGAGATTAGTTTTCAACATTTTATGTTTGCCTCAAATACCAACTGACAATGATGATGCGCGTTCACCGCTTCCCGAGTTTGTCCAGCTGTGCTGTTG  
GTTGCTTGAGATCTTCAAAATAAAGTACTCCCTTTGGAGAGAAATTAATAAATCATGCTCAATTTCCAG**CCGATACCTACTACTGCTGCGTACTGCTGCTGGC**  
**GTGTGAGATAGCCCTCAATCAAGGAGATTTCCCTACGACATAAAAACCAATAGTCTCAATTAAGCAGGCGGGAGCAACACTGCAATGAGTACAG**  
**GTAAGAATCTCTCT**  
TTATTGCTTCTCTAGGACCTTGGAGACGCTCTGAAGCACTCAAAAGGATCCTTTATGGGTTCTTATTGGCTTATTAGAGCTATAAATTCAGCTTCAATAAAAGA  
TTAAATTTTATCACCTTGATAGAGATGTGACCTTGGCTTTAGCTCCAGATTAGCGGTTTTGTTGCAAAATCCAATTTGGTGGTCAATTTTTTCTGTGGGACAACCTTGAA  
ATTGTTTTGATTGAGTTTAGTTTGGCTTCTTTCTCAATTTTAACTTTTGTATCAGACTGTTCTCATAAGAAAATTTGATGAGAATTAACCTTAAAGCTTCCGATTAA  
TTTACAACAAGCTTAAACCTTTCGCGTCTCATGAACTCTCGATCTTCTCATCAGGTAATTTCTGTGAAAGCTTTCAGAGAACATTTCTCACTAAGAACGTTT  
TCTTTAGCTAATTTACATAAATTCACGCATTTCTCTCTTTGAAAAACAATTAATTTCAATTAATTTTCAGAGAAAATAACAAGTTTTCATTTGGGTCAACGTATGAT  
CCGAAACGAAAGGTTTACGTAAGAAAATAACTCTAGCTAGGCTCAGTCAATTTCCATAAGAAAATTAATTTAGAATATAAAAATTTTTATCAGAAAAAACGAT  
TTTTCTATTCTGAAGATTTGTAAGATAAAATTTGAAATTTTCTAATAAATATATCTGAAAGCTCTCTATAAAAATTAATTTATTATCAAGATCATTCTCTCT

TC AATGCTTATCATGTCAACGATAACACATTATGATTTTTATATCATTGAAAGGGATTCCATTTTACAAGCTGCAGAGAGCACGCCAAGACGTTTTATGGCTTTTT  
AATTATTTCTATGGCCCTTGATAAAAACTTTTACGATTGCTGTATAACAATGTTGAGAGAAGCTTTTTAATTTTTATTCTCAATCTTTTTAGCATCTAAAAGTAAACTTAAG  
AGTTTTTTTTTATGAAAGAATTAACCTTTATTTATCTTTTCATGTTTATTTTGTAGTAAAGACCGTGAACCTGTCTCATTTTTCAAAAATAAATAAACAGAAAATGAATTTTAA  
TTTAAAAATTTTCTTTGTAGGGAGTCAATGCAATGGAACAAGTACCAGCACTCCAAATAGGTAAGTCTTTTTTTCATATTTTTTTTTTTCACGGAGAATTTATTTGGGGTGA  
AGACACGAAGAATTTGCAAAAAGTAGTAAGTTTGTAGAAAATCATCCCATTATTTCTGGCAACGTGAGTACAAAACAGATGTAGCGCCAAATTAGCAGCTCTGAGCG  
TCGTTGCCTATCCTGGTGGCGTCACCACCAAAGAGACTGGAAGCTGTGAGGACACAGTTGTGGAAGTAAATGTTGGCAATGTTCCATTCCGTGCGGACCTCATTGAGG  
TAGTACGCAAGGGAGTCTGCCATGCGGATGCTTTTCGGGTAGTCCCATGTAATTTGCAGTTCGAAACGAATTTGATCCTCCACGTGACGGGATTGTAGGTTCCAATC  
GTGTAGAGGGTTTTGCAGGAGGGTAAAACCTGGCCATTGCTGGCGGTAGTTGATTGTGCCAAAGTAGCTGTACCCAAACCGGCAGAGTAGTCACTTTCTGCGAGAACA  
GCGCAACGATTGATGCTCTGTCCAGCTTCGGCTTCGGCTTCCTGGAGACGCTCACTGAGGGCAATTAGGCAGGGATTCTGATTCCCAATCTCCTGGGCTCGCTGATTG  
ATGGCATCACGAGCTGACTGAGCGGAATCTTTGATGGCTGTAACGGAGTCCCATGCTCTGTGCGAGGGAAACTCGATTAAAGTCAGCAATCTCCTCGGAAGAATCCAGG  
CGTTGATTGCGAAGGAAGTAGTTGAGGTCGTAGTGAAGTCCGTAATAATCCCAGTGGAAATGCTCGCAGTTCCCGCGCAATGACTCTAAAATGAACAAAAAAGGAA  
ATTCTTTTGTAAATCTCACTTCATGAAGGGAAAGAAAGACTCACATTTGCAGCAGCAAAGGCAAAAAGAGCCACGAAAGAAAGGAGAACCTTCATCCTGAATAAACTT  
CCACCCTCAATGAGACAATGAGCTCAAGTGAATGCCAAGGGAAAGAACAATACTGAACTACTTTTTCGCAACATCTCGCACTTTTCGATATGACTTTATCACAAAACAT  
TTCCTACACATTAATTTAATTTGGGAGATTTTCATTTGATTACCCACAACATGGGCACAGCTGTGTTGATTGATTCCCTTCAATTTCCCTGTCATAATAAATGGAC  
TGTTGAAGGAATTAACCTGACCTGTGAGTTTCTGGAGCTCAATGTTTATTTTACACAAAATAAATAATTTAGCAGATTTAGCACCGTCAAAGCAATTTAGAGCAACAT  
CAATGCAGGAATTTATCCACACACTGGAGGATTTATTTTGGAGTAAATTTGAGTAAATGGCCACATGCAAAAGGATTCATGTTAATAGCTGCAATTTGCGGTTGGTTTACATCAAGCTTCC  
CTTATTCATTGAAAATCAATTTACCAAATGAATGCAGCTTTTGGCTATTAATTCAAATCCATTAAGTTTTATATGATTTATGATGTGAATTTTACAAATATAAAA  
GCTTTTACAGGTTTTTAAATGAAGGAAATAGTTTTAACAGAGAGAGATTAATTTGAGCAAAGAAAATTAATAAAGAGTCTTTAATATGCGATTGGGCTCTAGAAGTTT  
TTTTTTTACAGAATCTACTTCAATTTCAATTTAGGAATTTTTTTTAAATTTTTTTTTTTTAAATTTAATAGAATTTTTTTTTTCTCGGCATTTGCAAAAATAAAAA  
AATGAAAACACAGAATGAGATTTTATCTGAATTTCTTTTTTTCTATTAATAAATAGAGAGAAAAAATTTGTAAGAAATCCGAGAGAAAACTCTTTCTCGTTCAG  
CAATTTTCATGTAAGCAAAAGCCGAGAACAATAGCTAACAGATGGCGCTGACTTTTACTTGTCTTTCTATGACAGTTCGGAGATTTTTATCTCCTTCATCAGGCTCT  
CAATTGAACATATAGCTAATTTTTTTTTTATAGATTGTGAGCAATCAATTTGAAGAATTTGTTCTCTTGTCTCAATTTAAAAAAAATCTTTTCTATATTTAATTTTT  
AACGGCTAAGTTAAACCAACAGAGAAAAGAACTTTTTTTTTTAAACGGTGTGATTAGGCTAGAAAATTTGTTAGAAAATATTTACATTCACACAAAATAGTTTCT  
TTTCTGAATCAGTAATAACTTCTAGCTTTCTAGTATAAATCCTCATCAATTTTTTCACCATAAAAATTTCTCGGAAAAAATATTTAACATGAAAGCTATTTTTTTTT  
GATCTAAAATCATTTTTATTTTATGATTTTCTAAATAAAAATTTTCTGCTGCCAATTAGGAAAAATAAAATTTAAAAAAAACATTTTTTCTCTAATATAATCCAT  
TTTTTATTTTTTATCACCGTATTTGTTTCATAGAAAAACGTTTTTAGTAAAGCAAAACCCGAGAAGAACTTGGCGTTTGCATTTTTTGGGTATCTAATGAGCATGCTAAC  
AGTGGGAGAGATCATCCCTCAATTTGGTTTACATCAATGTTGTAGAGATTAGCCACAATAAGGAGGCAAGTTCTCCATGTTGATGTTGCCCGTGGTCTTGCCAACCTCTA  
GCATGTCGCGGTAGTAGTTGATGTAGTACTCATCGCGGATGTTCTCGCGATGATCCAGTTCTCCTGAAGCTCGAAGCGGATGTAGTCTGATTTGTGACGGCATTGT  
AGTGTCCAAGGTGTAGAGGACGAGGAGTTGGAGGAAGTGGACATACGCTGAGCGTAGTTGATGTGAAGAAGCCATAGTTCGAGGGCATGCTGGAAGTCACGGT  
GGAGTTGCGAGGACTGCTGATGCTCACACCGGCTCTCCTCGAGATGCCAATCGTGTGCGGATTTGAGCAATGACGGGATTTCTCCACCTCGCGCAT  
GATTTGTCATATGGCTGTTCCAGCTCACCGTACCGGCTGATGAGACGAGGCTTTACGTCATCCAAACTTGTCTCAAGAGCTACACGGTTGGCTGTCTGATGCTGCTACTGA  
CAAGAAGCGTTGATCCCTAAGCCAGTAGTCCACCTCCTCGTGGTATTTCATCGAACATCCTGTGGAATTCCTCAATTTCTTGTAGAGAATTTGCTCAAATTTGAATGAA  
TAAAAATCCCATTAAGTCATAAAGTCATTAATAATGAAAATGCAGCAGATTTTCTTACCTGTGCCGTAGCCACAACCAGAGCAATGAAAATGCAAGGACCTTCATGG  
TTGCTTGTATTCTTTTCCAGAGAGAATTCCTACCCACAGTTCCTTCTCGGACGGTATTAATGGCAAAATGGTAGCACAGATCGTGTGACGGGTGCGATTTTATTC  
AATGAACAAGGAGGGGCACGAATCTGCGTGAGAAGGAGACACAATCAACGAAAGGAAAATCAACCATGTTCAATCTCAACGCGATAAGATGTTTTCGTTTAAATTA  
CAAAACAATTTCTGCTCTCTGCGAGTACTGTTGGGAGGGCGCTTCTGCTACCTTCCGTGCCACCTGCAGAGAAATCAGGTGGCCAAATTTGGCGCAATCACCAC  
AAGAATCTCAATATAGATGAATGAATGAAAATATTTCCATCGTCGATCTTTTTTTCGTAGAAATTAATTTTTTGTGATTTTTTGGATAAAAAAATTTGTAGAT  
GGACACAGTTGATTGAATCGCTCTCGATAATGCATTATCTGGAGGAGACGCGTCCCAGAGACCCTCTGCCGAGGATGTCCACAAGAGGGCAAAGGTGCGTGAAATTT  
GCGAGGTGGTGGCATCGGGAATTCACCGTTGCAGAACTCGTTGTTCTCATTCATGTTGGGGAGGAGAAGAAGAAGGAATGGGCACAGCATTGGATCACTCGGGCTTCAG  
GGCCATTGAGAAGCTCCTTTCAACATCTGCTGCCAAATCTGCGTTCGGTGTGAGATCACGATGGCAGATTGCTGTTGGTACCTCAAGTTTTCAATGCTAGACGTAATTT  
ACCTTTGACAAAAGAAATCTTTAAGTTTTCTTTAGAGAAAATGTTATAAAAATGTTTTTTTGTGGTTCAGATTCACAGTGGATCTTAGACCTTATCCGATAATTTGCGC  
ATCGATCGCAATTTGGAGAGCCATCCGGCATTCCGGGCTGCTCATCCATCAAAATCAGCCAGATTGCTCTCCGGAAGCAGCCAAATAACCTCATGCAACTGCAAAAATGAAA  
TGAAAATCAGGTTCAAAGTAGAGCTCAACTCTTCTCTGTTCTTTTTCAGCTCTTTGCCAAGAAAATCATTTAAAGGAATTTTTTAAATTTTTTAAATGAAGACAC  
TTGATCAAAAATTTTTGATTGATGAATTAATGATACATTTAGTCCCTGTTTCTATGCAATTTATTA

> **LL0J000305\_a-PB** (219 aa; 5 exons) | **UNCHANGED**

**MASISCKLPILYSYWRSSCSWRVRIALNLKEIPYDIKPISLIKAGGEQHCNEYREVNAMQVPALQIDGHTLIESLSIMHYLEETRPQRPLLPQDVHKRAKRVREICEV**  
**VASGIQPLQNLVLIHVGEKKKEWAQHWITRGFRAIEKLLSTSAGKFCVGEITMADCCLVQVFNARFHVDLRYPYPIILRIDRELESHPAFRAAHPNSNPDCPPE**  
**AAK-**





>LLOJ010490 (151 aa; 3 exons) | UNCHANGED

MVDFSDIISNENVVFRAYVFWSTVLIVKTLAMSFLTGRQRFNKVFANPEDAAGKKLKVKFDDPDERVVRRAHRNDLENIFFPVLVAFFVYLTNPEPALAINLFRAAG IARIVHTLVYAVVWVPQPARGIAWVVLGSLYMAFKSIVFFI\*

##### LLOJ004345 - GST microsomal #####

>JH689577 forward | LLOJ004345 (pre-editing) | LLOJ004345\_a (post-editing)

TAATATCTCCACTATGAAGTAAATGATCTATATATTTTAAAGTAGGGGTGAACGACTATTCTATTAACATTTTCCCTGCACTGCATTGTCTTTGGAAATCCAAG CACAGTACTTGTGAGAAATCGAAGTGGTAAAGTCTGTGTCTAACAACCTTAAATATCCTTAAGATTTATTGATATTCTAAATTTAAAAAAAATGAATAAACTATAC CAGCTTATTTCGTTGATCTCTAGCGATAATCCAGTGTTCGGCATATGTTACGTGGATTGTATTTTAACCTTAAAAATGCTTTTAATGTCCGTTCTCACAGGAACCTT TTCGTGTTAAAAATCGCGTTAGTGTATTTAGTACGACGCGATGAAAAAGAGAATTTAATTTAAAAATAAGTGTCAATTTGTAGACTTTTGTTAAATCCGGAAAGATT ACCTAAGCAAGAAAATGGAAAATGAAGAGTGATCCACAGGTGGAGAGAGTTGTCGTCACATCTGAATGATATGGAAAATATCTACCTTTCCTCACCATTGGGCTCCTTTA TGTACTAACAATAAATAAGTAAATCGCCAGTAAATTTATATCGAGTGCAGCAACAGCTCGAATTTTTCATACAGTTGATACGCCTCTCACCATTTCGTCAACCAGCT CGTGCCTATTGCTCTTTACATGCTACTTGATTGAAATATATATGGCAATAATGTCATTATTAGATTTTGGTGAATGTGCACGTGAAGTTGTGGAGGATGGCCGAAAT TCCACCAAAAATTGCAAACATTTTGCCTAACTTTTCTCTTTTATGTTATGAAAACCTTGGAGAAATTTGTGAACCTTTCGAGTCAACTTAAAAAAAAGTCAATCG CTTAAGTTTATAGTAAAAGTAAAGTTTATGTAATTAAGATATTTCAATATATACTATGGTATTAAATGAAAATTTTGTATAATAAACCATCCTCCCACTCAT ACATAAAATGTTACAACCTTTATGTGAAAATTGTTCGATTTGACAAAACAGAGCATAAAGATCCTTGTAAAAATTTATAATATAAATCAGTTCATTGTTTTAAGAAA ACCTAAATTAATAATAAAAAAATTTATGAGTGAGAATTTTAAATTTATTTATTATTTATGTAATAATAAATTTCTATTATGTTTCATTCAATATAAATCTAT ATCTCTCATACATGAATGTGAATAGAATGCACCTGAATTACATGAAGAATAAATTCACATCAATAAAGTTTTTATTTATATCTTTTAACTTTACATAATAGACA TGAATATTAATTTGGACAAAAATATACAAAATACGGAACTTAAAAACAGGACTTGGGGACTATTGAAAAGGAATTTAATGACGATCCTTACTGAGACTAATGACC AAAACGACCTTCAAGAAATGTTGCCTGAAAAAATAGATATCAATGATACGTGTAGATTTTAGTATCACTGTACGGTACAACATATTAATGCATACAAGTACAAGT TATATATGTTTGAATCAGTAACT

>LLOJ004345\_a (153 aa; 2 exons) | EDITED

MNKTIPAYSLISSDNPFVSAYVTWICILTLKMLMSVLGTFRVKNAAFVNPELDPKQEMEMKSDPQVERVRRAHLNDMENILPFLTIGLLYVLTNPNKVIASNLRYV AATARIHTVVYALYPIRQPARAICFFTCYLIEIYMAIMCIIRFW\*

##### LLOJ002060 - GST microsomal #####

>JH689469 forward | LLOJ002060 (pre-editing) | LLOJ002060 (post-editing)

GATGTTGTATGTTATGAAAAAATATGTATATGTAGTACATTCATACATACATACATATCTCAAGGTGGCTAATCTTAATCCATCTGCCGTGATTTTCTCTACGACG CTCCACAAAATCAATCAGAAGGTGAGTTCTGGGGAATTGTGTTGAGTGTGGATGTAATAAATTTTCGGCAGTTTAAAAACGCTAAATCATGGTGAAGTCTTTCGA TATTATTTCCAATGAGAATGAAGTGTTCAGATCTTTTGCCTTTTGTTGGTTGTTCTTTCTTGTGAAAACCTGGCTATGGCCTATCTAACAGGACGAGTACGTTGGACGAA GAGGTAATTCAGAAAATCCTTTTCTATCAGAATGATGTTTTTTTCAAATAATATTTTGGAGGTCTTACACAATCTCAATATTATCTCATTAAATCGCATGACG ATGTAAGTTCGTAAACGCCCTCAATGTAGATTTTTTAAAAATAATTATCTTCTCCACTGTGTTAGCTTTCCGCAAAATGAAGAAGACGCCGGAATACAATGCAAAAGT CAAATTTGACGATCCCGACGTAGAAGCTGTGAGACGGTATGAAAGAATTTTACATATGTACAACATGTGTCTATATAGATCAAAAATATATATTTTTGTTCACA GAGCCCATCGAAATGACTTGGAGAATATTTTCCATTTCATTCGGTAGCATTCTTCTAGGTTGACAAAATCCCGAGCCAACTTGCATTAATCTCTTCAGAAATTCAGC CATTGCAAGGATCATCCATACTCTGTCTACGCTGTGTGGGTTGTACCCAACTGCTCCGGGTTGGCATTCTTCGTATGCTCCGATCTACCCCTCATACATGGCCTTCAAG ACAATCTTGTCTTTCATGTCGAATTTGTTTATTTTATTCTTGTCTGATTTAATATCCAAAGGAGATTTTCAATCTGGGAAAGAAAATTTATTCTTAAAGGGATT AATAAAAAGTATTTAAACATTCAGTTTCTTATGAAGAATTTAAGAAAATTCATTTCTGAATTAATGCAATAGCTCTGAAAAATAATTACTGTAGTGCTTAATATG GAAT

>LLOJ002060 (151 aa; 3 exons) | UNCHANGED

MVKFFDIISNENVFERSFVWVSVLLVVKTLAMAYLTGRVVRWTKKVSANEEDAAYNAKIKFDDPDERVVRRAHRNDLENIFFPVLVAFFVYLTNPEPTLAINLFRIAA IARIHTLVYAVVWVPQPARGLAFFVCLASTLYMAFKTILFFM\*

##### LLOJ008423 - GST microsomal #####

>JH690025 forward | LLOJ008423 (pre-editing) | LLOJ008423\_a (post-editing)

TAATAATAATAAAATTTATTGATGCCCAAGTAATAAAATACATAATGTGAGACTATACATATTTTAAATTTATTTTATATTTTATATATAAAATTTTCAGTC TGTAGAATAAATTTGTCTCTTAAGAGAAATGCGTGAATTTCTTTCTAATTTCTTCTAAGTGGATGTGCGCTATCCAATTAGTAAATTCAGCAATTTTGGTGT GTCACACTACAATGGGTAAGAAAACCCCAAAAACGGGAAAGTGAACAGTTGAAAAGCTCCTCCGTGGGAAAATGCAGTGAAATGCAAGACGAAGGAATTTAATTAAT TAGGAGAAGAAAATGAACGAGATTTCCTTTTGGAAAACCCGGAGGGAGTGTACGTGACTGTCACCTCTCATTGCCATTTCAGAGCCCTTTTGTCCACAAAAT CTCTGTATGGCATTTTACGAGGGATTGAAAAGACGTGCCCCACTGTACGTGGTACACCAAGGACGATGTTGGATAATGGCGTTAAATTTGCTTCTATTTCTCC CAGATGGAAATACACAGCTTGGCACAAAGATTAGCATGTTCTGTGTCTCTATCACTGCCAAGCTGGCTANNNNNNNNNNNNNNNNNNNNNNNNNNNNNNNNNNNN NNNNNNNNNNNNNNNCGTCTTCTTTACAGTTTTAACTGATTTTATGATTTTCTATTATAGTATGAAAGTAATGCGTAAAAAAAATGATCAGAAAAAACTC CATGGCCGTGAATGTTTTAATGGGATTATGACATGATTGTTGAGTGTGGACTTACACAACCAAGATAAGAAATATTATCTGCATTTCAATAAATATTAACAAC ACGATGGTGTATGTAAGGCAATGACAAAGCAATTTCAAACGCCCTCAATGTAGATTAATAAGATTTTCTGTATTTTCTGTAGTTTTTTTAGAGTTTTTGCTAATCTCAGGATTC AGCAATGTCACAAGACAAAACCCAAATTTGACGATCTTAAATGTTGAGCCTGTACGAAGGTATGTTTACATATACTTTTTTAAATTTTTTCTTATGCAACTTAGACGCAGA ATTAGGGAAATTTAGACACAGAATTAACAACCTTAGACGCAGAATTAACAACCTTAGACGCTGAATTAACAACCTTAGACGGAAGAAATTAACACACTTAGACGTTGAATTA ACAAATTTAGACGCTGAATTAACAACCTTAGACGAAGAATTAACAACCTTAGACGCAGAATTAACAATTTAACTCAGAATTAGGCAATTTAGATGCAGAATTTGCCAA CTTAGACGCAGAATTTAGATGCAGAATTTAGCAACCTTAAACGAAAATTTAGGGAATTTAGACGCAGTATTAACCAATTTAAACACAGAATTAACAACCTTAGACGGAAGAA TTAGGAATTTAGATGCACCTGTCTGATCTGAGAATTTCAACCGAAATTTCTAAATTTTCCAGAGCCCATCGCAACGATTTGGAAAATATCTTCCATTCGTCTTATTCG CTTCTTCTACGTGCTAACCAATCCACAAGCTTGGCTTGCCATCAATCTTCTCAGAGTGCAGCAATTTGCCAGGATTTGTCACACTGTTGCTACGCCGTTGTGTTGTACCC

CAACCAGCTAGAGCTTTGGCATTCTTTGTATGCCTTGCTGTTACCCTTTACATGGCATTCCAACAATGTATTCTTCTGTAAACATTAACATTAAGGATTATATTA  
AAAAAGTGCACCATAAACCATTTTGCATTGTATTTCAAGGAAAAATTTGGAGTATTGAGGGGAAAACGTTTNNNNNNNNNNNNNNNNNNNNNNNNNNNNNNNN  
NNNNNNNNNNNNGCCATTGGCAAATCCCATAAATAACGCGCCGAAGCTATTCAATAAATCCC

>LLOJ008423\_a (>107 aa; >2 exons) | EDITED (PARTIAL GENE - N-TERMINAL GAP)  
SFANPEDSAMYKTKPKFDDPNVERVRRAHRNDLENIFPFVLIAFFYVLNPNQAWLAINLFRVAAIARIVHTVVYAVVVVPQPARALAFFVCLAVTLYMAFQTIVFFL\*
