# Supplementary material for: Characterization of the glutathione S‐transferase genes in the sand flies Phlebotomus papatasi and Lutzomyia longipalpis shows expansion of the novel glutathione S‐transferase xi (X) class
Source: PubMed Central journal article supplement (PMC9540044; doi:10.1111/imb.12769), 2022-03-08
Supplement: IMB-31-417-s003.pdf [file IMB-31-417-s003.pdf]

**Supplementary Table 1.** Glutathione S-Transferase genes in *Phlebotomus papatasi*. The gene ID, protein length (amino acids; aa) and number of exons (protein coding exons only; exons in UTR excluded) are shown for *P. papatasi* genes and their best matching genes in *Aedes aegypti*, *Anopheles gambiae* and *Drosophila melanogaster*. Gene IDs followed by a letter (e.g. “\_a”) were manually edited from the original gene model.

| <i>Phlebotomus papatasi</i>                                                      | Subfamily | <i>Aedes aegypti</i>                                           | <i>Anopheles gambiae</i>                                         | <i>Lutzomyia longipalpis</i>             | <i>Drosophila melanogaster</i>                                                                          |
|----------------------------------------------------------------------------------|-----------|----------------------------------------------------------------|------------------------------------------------------------------|------------------------------------------|---------------------------------------------------------------------------------------------------------|
| PPAI001211<br>(217 aa; 3 exons)                                                  | GSTD      | AAEL001090,<br>GSTD7<br>(218 aa; 4 exons)                      | AGAP004163,<br>GSTD7<br>(218 aa; 3 exons)                        | LLOJ007285<br>(220 aa; 3 exons)          | FBgn0038029, GSTD11<br>(222/243 aa; 3/3 exons)                                                          |
| PPAI006595_a <sup>1</sup><br>(224 aa; 3 exons)                                   | GSTD      | AAEL001061,<br>GSTD1<br>(216/209/211 aa;<br>2/2/2 exons)       | AGAP004164,<br>GSTD1-4<br>(209/209/216/186<br>aa; 2/2/2/2 exons) | LLOJ004462, GSTD<br>(212 aa; 3 exons)    | FBgn0001149, GSTD1<br>(209/209 aa; 1/1 exon)                                                            |
| PPAI009870<br>(229 aa; 2 exons)                                                  | GSTI      | AAEL011752,<br>GSTI1<br>(231 aa; 2 exons)                      | AGAP000947,<br>GSTU1<br>(233 aa; 2 exons)                        | LLOJ002711<br>(339 aa; 4 exons)          | FBgn0250732,<br>GST-containing FLYWCH<br>zinc-finger protein, gzf<br>(234/1045/1045 aa; 2/4/4<br>exons) |
| PPAI000142_a <sup>2</sup><br>(253 aa; 4 exons; gene split<br>across 2 scaffolds) | GSTO      | AAEL017085,<br>GSTO1<br>(257 aa; 4 exons)                      | AGAP005749,<br>GSTO1<br>(248 aa; 3 exons)                        | LLOJ009136_a, GSTO2<br>(253 aa; 4 exons) | FBgn0035907, GstO1<br>(254 aa; 4 exons)                                                                 |
| PPAI002540_a <sup>3</sup> , GSTS1<br>(203 aa; 3 exons)                           | GSTS      | AAEL011741,<br>GSTS1<br>(237/237/203/203<br>aa; 4/5/3/4 exons) | AGAP010404,<br>GSTS1<br>(203/203 aa; 3/4<br>exons)               | LLOJ009037, GSTS1<br>(203 aa; 3 exons)   | FBgn0010226, GstS1<br>(249/249/249/250 aa;<br>4/4/4/4 exons)                                            |
| PPAI003974_a <sup>4</sup><br>(227 aa; 2 exons)                                   | GSTT      | AAEL009017,<br>GSTT1<br>(229 aa; 3 exons)                      | AGAP000761,<br>GSTT1<br>(229 aa; 3 exons)                        | LLOJ005757<br>(226 aa; 2 exons)          | FBgn0031117, GstT3<br>(228/228/268 aa; 3/3/4<br>exons)                                                  |
| PPAI000341_a <sup>5</sup><br>(167 aa; 2 exons)                                   | GSTT      | AAEL025929<br>(231 aa; 2 exons)                                | AGAP000761,<br>GSTT1<br>(229 aa; 3 exons)                        | LLOJ002682<br>(446 aa; 5 exons)          | FBgn0031117, GstT3<br>(228/228/268 aa; 3/3/4<br>exons)                                                  |
| PPAI000341_b <sup>5</sup><br>(>51 aa; >1 exon)                                   | GSTT      | AAEL009017,<br>GSTT1<br>(229 aa; 3 exons)                      | AGAP000761,<br>GSTT1<br>(229 aa; 3 exons)                        | LLOJ002025<br>(227 aa; 3 exons)          | FBgn0050000, GstT1<br>(228 aa; 4 exons)                                                                 |
| PPAI010868<br>(221 aa; 4 exons)                                                  | GSTX      | AAEL010500,<br>GSTX2<br>(218/192 aa; 3/3<br>exons)             | AGAP009342,<br>GSTU3<br>(218 aa; 2 exons)                        | LLOJ010538<br>(222/221 aa; 4/4 exons)    | FBgn0063497, GstE3<br>(220 aa; 1 exon)                                                                  |
| PPAI010869<br>(221 aa; 3 exons)                                                  | GSTX      | AAEL010500,<br>GSTX2<br>(218/192 aa; 3/3<br>exons)             | AGAP009342,<br>GSTU3<br>(218 aa; 2 exons)                        | LLOJ009528<br>(277 aa; 4 exons)          | FBgn0063494, GstE6<br>(222 aa; 1 exon)                                                                  |
| PPAI010870_a <sup>6</sup><br>(219 aa; 3 exons)                                   | GSTX      | AAEL010500,<br>GSTX2<br>(218/192 aa; 3/3<br>exons)             | AGAP009342,<br>GSTU3<br>(218 aa; 2 exons)                        | LLOJ010488<br>(221 aa; 4 exons)          | FBgn0010044, GstD8<br>(212 aa; 1 exon)                                                                  |
| PPAI010870_b <sup>6</sup><br>(221 aa; 3 exons)                                   | GSTX      | AAEL010500,<br>GSTX2<br>(218/192 aa; 3/3<br>exons)             | AGAP009342,<br>GSTU3<br>(218 aa; 2 exons)                        | LLOJ009529<br>(225 aa; 3 exons)          | FBgn0063494, GstE6<br>(222 aa; 1 exon)                                                                  |
| PPAI010870_c <sup>6</sup>                                                        | GSTX      | AAEL010500,                                                    | AGAP009342,                                                      | LLOJ009528                               | FBgn0010044, GstD8                                                                                      |

|                                                                                   |            |                                                                 |                                                             |                                 |                                                     |
|-----------------------------------------------------------------------------------|------------|-----------------------------------------------------------------|-------------------------------------------------------------|---------------------------------|-----------------------------------------------------|
| (221 aa; 3 exons)                                                                 |            | GSTX2<br>(218/192 aa; 3/3 exons)                                | GSTU3<br>(218 aa; 2 exons)                                  | (277 aa; 4 exons)               | (212 aa; 1 exon)                                    |
| PPAI010871_a <sup>7</sup><br>(221 aa; 3 exons)                                    | GSTX       | AAEL010500,<br>GSTX2<br>(218/192 aa; 3/3 exons)                 | AGAP009342,<br>GSTU3<br>(218 aa; 2 exons)                   | LLOJ009529<br>(225 aa; 3 exons) | FBgn0010044, GstD8<br>(212 aa; 1 exon)              |
| PPAI010871_b <sup>7</sup><br>(221 aa; 3 exons)                                    | GSTX       | AAEL010500,<br>GSTX2<br>(218/192 aa; 3/3 exons)                 | AGAP009342,<br>GSTU3<br>(218 aa; 2 exons)                   | LLOJ009529<br>(225 aa; 3 exons) | FBgn0010044, GstD8<br>(212 aa; 1 exon)              |
| PPAI010871_c <sup>7</sup><br>(221 aa; 3 exons)                                    | GSTX       | AAEL010500,<br>GSTX2<br>(218/192 aa; 3/3 exons)                 | AGAP009342,<br>GSTU3<br>(218 aa; 2 exons)                   | LLOJ010539<br>(221 aa; 4 exons) | FBgn0010044, GstD8<br>(212 aa; 1 exon)              |
| PPAI010871_d <sup>7</sup><br>(221 aa; 3 exons)                                    | GSTX       | AAEL010500,<br>GSTX2<br>(218/192 aa; 3/3 exons)                 | AGAP009342,<br>GSTU3<br>(218 aa; 2 exons)                   | LLOJ009528<br>(277 aa; 4 exons) | FBgn0010043, GstD7<br>(224 aa; 1 exon)              |
| PPAI010871_e <sup>7</sup><br>(cannot reconstruct an in-frame gene model)          | GSTX       | -                                                               | -                                                           | -                               | -                                                   |
| PPAI010872<br>(220 aa; 3 exons)                                                   | GSTX       | AAEL010500,<br>GSTX2<br>(218/192 aa; 3/3 exons)                 | AGAP009342,<br>GSTU3<br>(218 aa; 2 exons)                   | LLOJ009529<br>(225 aa; 3 exons) | FBgn0063497, GstE3<br>(220 aa; 1 exon)              |
|                                                                                   |            |                                                                 |                                                             |                                 |                                                     |
| PPAI008305_a <sup>8</sup><br>(>114 aa; >1 exon; partial - C-terminal end missing) | GSTX       | AAEL010500,<br>GSTX2<br>(218/192 aa; 3/3 exons)                 | AGAP004163,<br>GSTD7<br>(218 aa; 3 exons)                   | LLOJ010963<br>(221 aa; 3 exons) | FBgn0038020 GstD9<br>(218/218 aa; 1/1 exon)         |
|                                                                                   |            |                                                                 |                                                             |                                 |                                                     |
| PPAI006902_a<br>+<br>PPAI000943_a <sup>9</sup><br>(>201/204 aa; >3/4 exons)       | GSTZ       | AAEL011934,<br>GSTZ1<br>(233/219 aa; 3/4 exons)                 | AGAP002898,<br>GSTZ1<br>(222/263/219/219 aa; 3/5/4/4 exons) | LLOJ000305<br>(219 aa; 5 exons) | FBgn0037697, GstZ2<br>(220/215/227 aa; 4/4/3 exons) |
|                                                                                   |            |                                                                 |                                                             |                                 |                                                     |
| PPAI007443_a <sup>10</sup><br>(151 aa; 3 exons)                                   | Microsomal | AAEL006829<br>(149 aa; 3 exons)                                 | AGAP000165,<br>GSTMS1<br>(151 aa; 2 exons)                  | LLOJ002060<br>(151 aa; 3 exons) | FBgn0025814, MgstI<br>(151/151/152 aa; 2/2/2 exons) |
| PPAI007443_b <sup>10</sup><br>(153 aa; 3 exons)                                   | Microsomal | AAEL006829<br>(149 aa; 3 exons)                                 | AGAP000165,<br>GSTMS1<br>(151 aa; 2 exons)                  | LLOJ002060<br>(151 aa; 3 exons) | FBgn0025814, MgstI<br>(151/151/152 aa; 2/2/2 exons) |
| PPAI007443_c <sup>10</sup><br>(151 aa; 3 exons)                                   | Microsomal | AAEL006829<br>(149 aa; 3 exons)                                 | AGAP000165,<br>GSTMS1<br>(151 aa; 2 exons)                  | LLOJ010490<br>(151 aa; 3 exons) | FBgn0025814, MgstI<br>(151/151/152 aa; 2/2/2 exons) |
| PPAI007443_d <sup>10</sup><br>(141 aa; 3 exons)                                   | Microsomal | AAEL023181, (148 aa; 2 exons) /<br>AAEL010157 (148 aa; 2 exons) | AGAP000163,<br>GSTMS2 (152/153 aa; 3/3 exons)               | LLOJ002060<br>(151 aa; 3 exons) | FBgn0025814, MgstI<br>(151/151/152 aa; 2/2/2 exons) |

<sup>1</sup> Modified from original gene PPAI006595 (169 aa; 1 exon)

<sup>2</sup> Modified from original gene PPAI000142 (50 aa; 2 exons), with an additional unannotated exon on a different scaffold

<sup>3</sup> Modified from original gene PPAI002540 (158 aa; 2 exons)

<sup>4</sup> Modified from original gene PPAI003974 (258 aa; 2 exons)

<sup>5</sup> Modified from original gene PPAI000341 (175 aa; 2 exons)

<sup>6</sup> Modified from original gene PPAI010870 (399 aa; 7 exons)

<sup>7</sup> Modified from original gene PPAI010871 (840 aa; 13 exons)

<sup>8</sup> Modified from original gene PPAI008305 (117 aa; 1 exon)

<sup>9</sup> Modified and joined two partial GSTZ genes (PPAI006902, PPAI000943) into one (still incomplete - lacking a middle exon) gene model

<sup>10</sup> Modified from original gene PPAI007443 (504 aa; 10 exons)
