# Supplementary material for: Characterization of the glutathione S‐transferase genes in the sand flies Phlebotomus papatasi and Lutzomyia longipalpis shows expansion of the novel glutathione S‐transferase xi (X) class
Source: PubMed Central journal article supplement (PMC9540044; doi:10.1111/imb.12769), 2022-03-08

**A.***P. papatasi* GSTS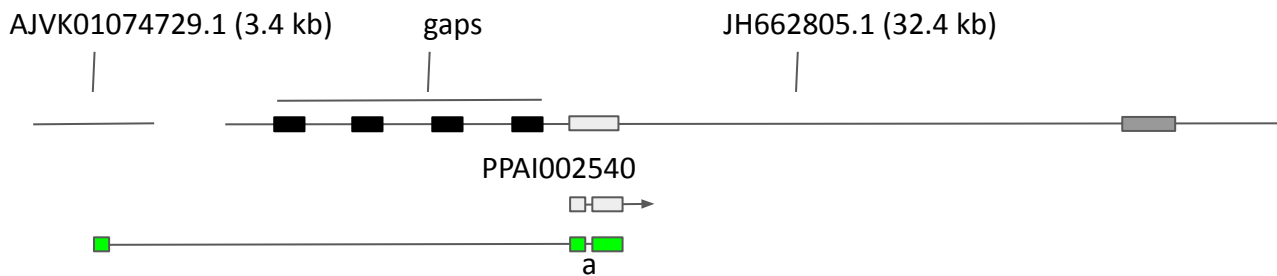**B.***L. longipalpis* GSTS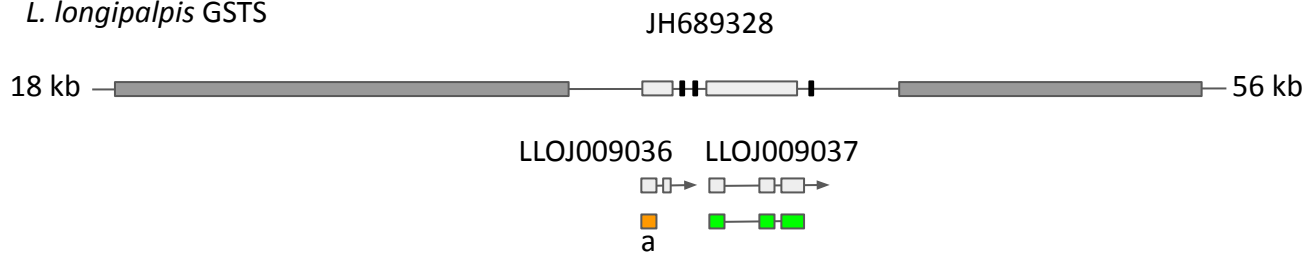**C.**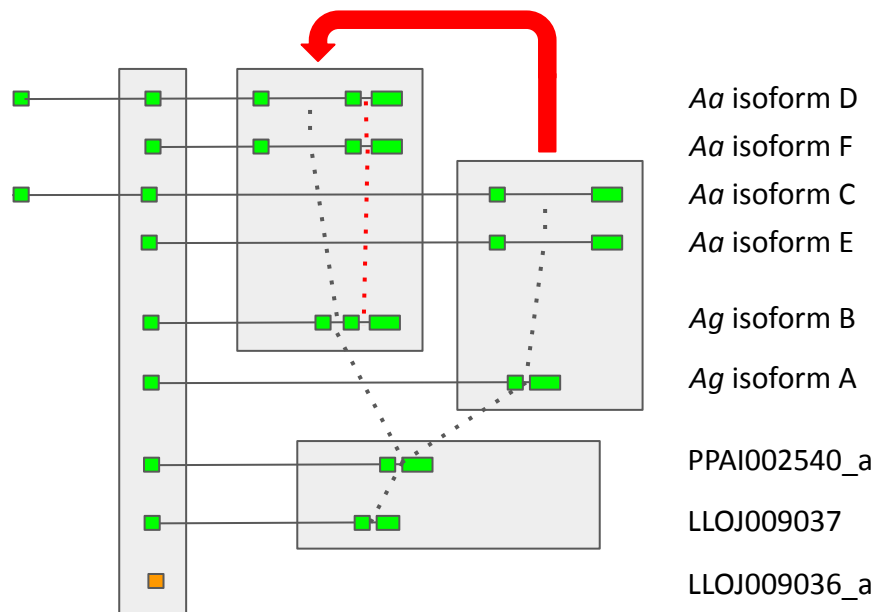

Supplement: IMB-31-417-s004.pdf [file IMB-31-417-s004.pdf]
