# Supplementary material for: Characterization of the glutathione S‐transferase genes in the sand flies Phlebotomus papatasi and Lutzomyia longipalpis shows expansion of the novel glutathione S‐transferase xi (X) class
Source: PubMed Central journal article supplement (PMC9540044; doi:10.1111/imb.12769), 2022-03-08
Supplement: IMB-31-417-s005.pdf [file IMB-31-417-s005.pdf]

**Supplementary Table 2.** Glutathione S-Transferase genes in *Lutzomyia longipalpis*. The gene ID, protein length (amino acids) and number of exons are shown for *L. longipalpis* genes and their best matching genes in *Aedes aegypti*, *Anopheles gambiae* and *Drosophila melanogaster*. Gene IDs followed by a letter (e.g. “\_a”) were manually edited from the original gene model.

| <i>Lutzomyia longipalpis</i>                                                 | Subfamily | <i>Aedes aegypti</i>                                     | <i>Anopheles gambiae</i>                                         | <i>Phlebotomus papatasi</i>     | <i>Drosophila melanogaster</i>                                                                          |
|------------------------------------------------------------------------------|-----------|----------------------------------------------------------|------------------------------------------------------------------|---------------------------------|---------------------------------------------------------------------------------------------------------|
| LLOJ007285<br>(220 aa; 3 exons)                                              | GSTD      | AAEL001090,<br>GSTD7<br>(218 aa; 4 exons)                | AGAP004163,<br>GSTD7<br>(218 aa; 3 exons)                        | PPAI001211<br>(217 aa; 3 exons) | FBgn0038029, GSTD11<br>(222/243 aa; 3/3 exons)                                                          |
| LLOJ004462, GSTD<br>(212 aa; 3 exons)                                        | GSTD      | AAEL001061,<br>GSTD1<br>(216/209/211 aa;<br>2/2/2 exons) | AGAP004164,<br>GSTD1-4<br>(209/209/216/186<br>aa; 2/2/2/2 exons) | PPAI006595<br>(169 aa; 1 exon)  | FBgn0001149, GSTD1<br>(209/209 aa; 1/1 exon)                                                            |
| LLOJ004461_a <sup>1</sup><br>(215 aa; 3 exons)                               | GSTD      | AAEL001061,<br>GSTD1<br>(216/209/211 aa;<br>2/2/2 exons) | AGAP004164,<br>GSTD1-4<br>(209/209/216/186<br>aa; 2/2/2/2 exons) | PPAI006595<br>(169 aa; 1 exon)  | FBgn0001149, GSTD1<br>(209/209 aa; 1/1 exon)                                                            |
| LLOJ004461_b <sup>1</sup><br>(217 aa; 3 exons)                               | GSTD      | AAEL001061,<br>GSTD1<br>(216/209/211 aa;<br>2/2/2 exons) | AGAP004164,<br>GSTD1-4<br>(209/209/216/186<br>aa; 2/2/2/2 exons) | PPAI006595<br>(169 aa; 1 exon)  | FBgn0001149, GSTD1<br>(209/209 aa; 1/1 exon)                                                            |
| LLOJ004461_c <sup>1</sup><br>(213 aa; 3 exons)                               | GSTD      | AAEL001061,<br>GSTD1<br>(216/209/211 aa;<br>2/2/2 exons) | AGAP004164,<br>GSTD1-4<br>(209/209/216/186<br>aa; 2/2/2/2 exons) | PPAI006595<br>(169 aa; 1 exon)  | FBgn0001149, GSTD1<br>(209/209 aa; 1/1 exon)                                                            |
| LLOJ004461_d <sup>1</sup><br>(217 aa; 3 exons)                               | GSTD      | AAEL001061,<br>GSTD1<br>(216/209/211 aa;<br>2/2/2 exons) | AGAP004164,<br>GSTD1-4<br>(209/209/216/186<br>aa; 2/2/2/2 exons) | PPAI006595<br>(169 aa; 1 exon)  | FBgn0001149, GSTD1<br>(209/209 aa; 1/1 exon)                                                            |
| LLOJ004461_e <sup>1</sup><br>(218 aa; 3 exons)                               | GSTD      | AAEL001061,<br>GSTD1<br>(216/209/211 aa;<br>2/2/2 exons) | AGAP004164,<br>GSTD1-4<br>(209/209/216/186<br>aa; 2/2/2/2 exons) | PPAI006595<br>(169 aa; 1 exon)  | FBgn0001149, GSTD1<br>(209/209 aa; 1/1 exon)                                                            |
| LLOJ004461_f <sup>1</sup><br>(222 aa; 3 exons)                               | GSTD      | AAEL001061,<br>GSTD1<br>(216/209/211 aa;<br>2/2/2 exons) | AGAP004164,<br>GSTD1-4<br>(209/209/216/186<br>aa; 2/2/2/2 exons) | PPAI006595<br>(169 aa; 1 exon)  | FBgn0001149, GSTD1<br>(209/209 aa; 1/1 exon)                                                            |
| LLOJ004461_g <sup>1</sup><br>(218aa; 3 exons)                                | GSTD      | AAEL001061,<br>GSTD1<br>(216/209/211 aa;<br>2/2/2 exons) | AGAP004164,<br>GSTD1-4<br>(209/209/216/186<br>aa; 2/2/2/2 exons) | PPAI006595<br>(169 aa; 1 exon)  | FBgn0001149, GSTD1<br>(209/209 aa; 1/1 exon)                                                            |
| LLOJ004460_a <sup>2</sup><br>(>128 aa; 3 exons; partial -<br>internal gap)   | GSTD      | AAEL001061,<br>GSTD1<br>(216/209/211 aa;<br>2/2/2 exons) | AGAP004164,<br>GSTD1-4<br>(209/209/216/186<br>aa; 2/2/2/2 exons) | PPAI006595<br>(169 aa; 1 exon)  | FBgn0001149, GSTD1<br>(209/209 aa; 1/1 exon)                                                            |
| LLOJ004460_b <sup>2</sup><br>(>176 aa; 3 exons; partial -<br>C-terminal gap) | GSTD      | AAEL001061,<br>GSTD1<br>(216/209/211 aa;<br>2/2/2 exons) | AGAP004164,<br>GSTD1-4<br>(209/209/216/186<br>aa; 2/2/2/2 exons) | PPAI006595<br>(169 aa; 1 exon)  | FBgn0001149, GSTD1<br>(209/209 aa; 1/1 exon)                                                            |
| LLOJ002711_a <sup>3</sup><br>(>112 aa; ~2 exons)                             | GSTI      | AAEL011752,<br>GSTI1<br>(231 aa; 2 exons)                | AGAP000947,<br>GSTU1<br>(233 aa; 2 exons)                        | PPAI009870<br>(229 aa; 2 exons) | FBgn0250732,<br>GST-containing FLYWCH<br>zinc-finger protein, gzf<br>(234/1045/1045 aa; 2/4/4<br>exons) |
| LLOJ002711_b <sup>3</sup><br>(>161 aa; ~2 exons)                             | GSTI      | AAEL011752,<br>GSTI1<br>(231 aa; 2 exons)                | AGAP000947,<br>GSTU1<br>(233 aa; 2 exons)                        | PPAI009870<br>(229 aa; 2 exons) | FBgn0250732,<br>GST-containing FLYWCH<br>zinc-finger protein, gzf<br>(234/1045/1045 aa; 2/4/4<br>exons) |

|                                                                                       |      |                                                                |                                                    |                                        |                                                                                                         |
|---------------------------------------------------------------------------------------|------|----------------------------------------------------------------|----------------------------------------------------|----------------------------------------|---------------------------------------------------------------------------------------------------------|
|                                                                                       |      |                                                                |                                                    |                                        | exons)                                                                                                  |
| LLOJ002711_c <sup>3</sup><br>(>87 aa; ~2 exons)                                       | GSTI | AAEL011752,<br>GSTI1<br>(231 aa; 2 exons)                      | AGAP000947,<br>GSTU1<br>(233 aa; 2 exons)          | PPAI009870<br>(229 aa; 2 exons)        | FBgn0250732,<br>GST-containing FLYWCH<br>zinc-finger protein, gzf<br>(234/1045/1045 aa; 2/4/4<br>exons) |
| LLOJ009136_a <sup>4</sup> , GSTO2<br>(253 aa; 4 exons)                                | GSTO | AAEL017085,<br>GSTO1<br>(257 aa; 4 exons)                      | AGAP005749,<br>GSTO1<br>(248 aa; 3 exons)          | PPAI000142<br>(50 aa; 2 exons)         | FBgn0035907, GstO1<br>(254 aa; 4 exons)                                                                 |
| LLOJ009036_a <sup>5</sup><br>(>44 aa; >1 exon)                                        | GSTS | AAEL011741,<br>GSTS1<br>(237/237/203/203<br>aa; 4/5/3/4 exons) | AGAP010404,<br>GSTS1<br>(203/203 aa; 3/4<br>exons) | No matches                             | FBgn0010226, GstS1<br>(249/249/249/250 aa;<br>4/4/4/4 exons)                                            |
| LLOJ009037, GSTS1<br>(203 aa; 3 exons)                                                | GSTS | AAEL011741,<br>GSTS1<br>(237/237/203/203<br>aa; 4/5/3/4 exons) | AGAP010404,<br>GSTS1<br>(203/203 aa; 3/4<br>exons) | PPAI002540, GSTS1<br>(158 aa; 2 exons) | FBgn0010226, GstS1<br>(249/249/249/250 aa;<br>4/4/4/4 exons)                                            |
| LLOJ005757<br>(226 aa; 2 exons)                                                       | GSTT | AAEL009017,<br>GSTT1<br>(229 aa; 3 exons)                      | AGAP000761,<br>GSTT1<br>(229 aa; 3 exons)          | PPAI003974<br>(258 aa; 2 exons)        | FBgn0031117, GstT3<br>(228/228/268 aa; 3/3/4<br>exons)                                                  |
| LLOJ002025<br>(227 aa; 3 exons)                                                       | GSTT | AAEL025929<br>(231 aa; 2 exons)                                | AGAP000761,<br>GSTT1<br>(229 aa; 3 exons)          | PPAI003974<br>(258 aa; 2 exons)        | FBgn0031117, GstT3<br>(228/228/268 aa; 3/3/4<br>exons)                                                  |
| LLOJ008830_a <sup>6</sup><br>(229 aa; 3 exons)                                        | GSTT | AAEL009017,<br>GSTT1<br>(229 aa; 3 exons)                      | AGAP000761,<br>GSTT1<br>(229 aa; 3 exons)          | PPAI003974<br>(258 aa; 2 exons)        | FBgn0031117, GstT3<br>(228/228/268 aa; 3/3/4<br>exons)                                                  |
| LLOJ002682_a <sup>7</sup><br>(230 aa; 3 exons)                                        | GSTT | AAEL025929<br>(231 aa; 2 exons)                                | AGAP000761,<br>GSTT1<br>(229 aa; 3 exons)          | PPAI003974<br>(258 aa; 2 exons)        | FBgn0031117, GstT3<br>(228/228/268 aa; 3/3/4<br>exons)                                                  |
| LLOJ001842_a <sup>8</sup><br>(221 aa; 4 exons)                                        | GSTX | AAEL010500,<br>GSTX2<br>(218/192 aa; 3/3<br>exons)             | AGAP009342,<br>GSTU3<br>(218 aa; 2 exons)          | PPAI010868<br>(221 aa; 4 exons)        | FBgn0038029, GstD11<br>(222/243 aa; 3/3 exons)                                                          |
| LLOJ001842_b <sup>8</sup><br>(>167 aa; >3 exons; partial -<br>C-terminal end missing) | GSTX | AAEL010500,<br>GSTX2<br>(218/192 aa; 3/3<br>exons)             | AGAP009342,<br>GSTU3<br>(218 aa; 2 exons)          | PPAI010868<br>(221 aa; 4 exons)        | FBgn0038029, GstD11<br>(222/243 aa; 3/3 exons)                                                          |
| LLOJ001842_c <sup>8</sup><br>(>109 aa; >2 exons; partial -<br>N-terminal end missing) | GSTX | AAEL010500,<br>GSTX2<br>(218/192 aa; 3/3<br>exons)             | AGAP009342,<br>GSTU3<br>(218 aa; 2 exons)          | PPAI010868<br>(221 aa; 4 exons)        | FBgn0010039, GstD3<br>(199 aa; 1 exon)                                                                  |
| LLOJ001842_d <sup>8</sup><br>(221 aa; 4 exons)                                        | GSTX | AAEL010500,<br>GSTX2<br>(218/192 aa; 3/3<br>exons)             | AGAP009342,<br>GSTU3<br>(218 aa; 2 exons)          | PPAI010868<br>(221 aa; 4 exons)        | FBgn0038029, GstD11<br>(222/243 aa; 3/3 exons)                                                          |
| LLOJ001842_e <sup>8</sup><br>(222 aa; 4 exons)                                        | GSTX | AAEL010500,<br>GSTX2<br>(218/192 aa; 3/3<br>exons)             | AGAP009342,<br>GSTU3<br>(218 aa; 2 exons)          | PPAI010868<br>(221 aa; 4 exons)        | FBgn0063494, GstE6<br>(222 aa; 1 exon)                                                                  |
| LLOJ001842_f <sup>8</sup><br>(221 aa; 4 exons)                                        | GSTX | AAEL010500,<br>GSTX2<br>(218/192 aa; 3/3<br>exons)             | AGAP009342,<br>GSTU3<br>(218 aa; 2 exons)          | PPAI010868<br>(221 aa; 4 exons)        | FBgn0063494, GstE6<br>(222 aa; 1 exon)                                                                  |

|                                                                                        |      |                                                    |                                           |                                 |                                                |
|----------------------------------------------------------------------------------------|------|----------------------------------------------------|-------------------------------------------|---------------------------------|------------------------------------------------|
| LLOJ001842_g <sup>8</sup><br>(221 aa; 4 exons)                                         | GSTX | AAEL010500,<br>GSTX2<br>(218/192 aa; 3/3<br>exons) | AGAP009342,<br>GSTU3<br>(218 aa; 2 exons) | PPAI010868<br>(221 aa; 4 exons) | FBgn0038029, GstD11<br>(222/243 aa; 3/3 exons) |
|                                                                                        |      |                                                    |                                           |                                 |                                                |
| LLOJ009529<br>(225 aa; 3 exons)                                                        | GSTX | AAEL010500,<br>GSTX2<br>(218/192 aa; 3/3<br>exons) | AGAP009342,<br>GSTU3<br>(218 aa; 2 exons) | PPAI010872<br>(220 aa; 3 exons) | FBgn0001149, GstD1<br>(209/209 aa; 1/1 exon)   |
| LLOJ009528_a <sup>9</sup><br>(221 aa; 3 exons)                                         | GSTX | AAEL010500,<br>GSTX2<br>(218/192 aa; 3/3<br>exons) | AGAP009342,<br>GSTU3<br>(218 aa; 2 exons) | PPAI010869<br>(221 aa; 3 exons) | FBgn0010043, GstD7<br>(224 aa; 1 exon)         |
| LLOJ009528_b <sup>9</sup><br>(221 aa; 3 exons)                                         | GSTX | AAEL010500,<br>GSTX2<br>(218/192 aa; 3/3<br>exons) | AGAP009342,<br>GSTU3<br>(218 aa; 2 exons) | PPAI010872<br>(220 aa; 3 exons) | FBgn0010044, GstD8<br>(212 aa; 1 exon)         |
| LLOJ010488<br>(221 aa; 4 exons)                                                        | GSTX | AAEL010500,<br>GSTX2<br>(218/192 aa; 3/3<br>exons) | AGAP009342,<br>GSTU3<br>(218 aa; 2 exons) | PPAI010868<br>(221 aa; 4 exons) | FBgn0063497, GstE3<br>(220 aa; 1 exon)         |
| LLOJ010539<br>(221 aa; 4 exons)                                                        | GSTX | AAEL010500,<br>GSTX2<br>(218/192 aa; 3/3<br>exons) | AGAP009342,<br>GSTU3<br>(218 aa; 2 exons) | PPAI010868<br>(221 aa; 4 exons) | FBgn0010044, GstD8<br>(212 aa; 1 exon)         |
| LLOJ010538<br>(222/221 aa; 4/4 exons)                                                  | GSTX | AAEL010500,<br>GSTX2<br>(218/192 aa; 3/3<br>exons) | AGAP009342,<br>GSTU3<br>(218 aa; 2 exons) | PPAI010868<br>(221 aa; 4 exons) | FBgn0001149, GstD1<br>(209/209 aa; 1/1 exon)   |
| LLOJ010537<br>(221 aa; 4 exons)                                                        | GSTX | AAEL010500,<br>GSTX2<br>(218/192 aa; 3/3<br>exons) | AGAP009342,<br>GSTU3<br>(218 aa; 2 exons) | PPAI010868<br>(221 aa; 4 exons) | FBgn0001149, GstD1<br>(209/209 aa; 1/1 exon)   |
| LLOJ010536<br>(221 aa; 4 exons)                                                        | GSTX | AAEL010500,<br>GSTX2<br>(218/192 aa; 3/3<br>exons) | AGAP009342,<br>GSTU3<br>(218 aa; 2 exons) | PPAI010868<br>(221 aa; 4 exons) | FBgn0038029, GstD11<br>(222/243 aa; 3/3 exons) |
| LLOJ010535_a <sup>10</sup><br>(>192 aa; >3 exons; partial -<br>N-terminal end missing) | GSTX | AAEL010500,<br>GSTX2<br>(218/192 aa; 3/3<br>exons) | AGAP009342,<br>GSTU3<br>(218 aa; 2 exons) | PPAI010868<br>(221 aa; 4 exons) | FBgn0010041, GstD5<br>(216 aa; 1 exon)         |
| LLOJ010534 <sup>10</sup><br>(>191 aa; >3 exons; partial -<br>N-terminal end missing)   |      |                                                    |                                           |                                 | FBgn0038029, GstD11<br>(222/243 aa; 3/3 exons) |
| LLOJ010533_a <sup>11</sup><br>(221 aa; 4 exons)                                        | GSTX | AAEL010500,<br>GSTX2<br>(218/192 aa; 3/3<br>exons) | AGAP009342,<br>GSTU3<br>(218 aa; 2 exons) | PPAI010868<br>(221 aa; 4 exons) | FBgn0001149, GstD1<br>(209/209 aa; 1/1 exon)   |
| LLOJ010532<br>(221 aa; 4 exons)                                                        | GSTX | AAEL010500,<br>GSTX2<br>(218/192 aa; 3/3<br>exons) | AGAP009342,<br>GSTU3<br>(218 aa; 2 exons) | PPAI010868<br>(221 aa; 4 exons) | FBgn0038029, GstD11<br>(222/243 aa; 3/3 exons) |
| LLOJ010530<br>(221 aa; 4 exons)                                                        | GSTX | AAEL010500,<br>GSTX2<br>(218/192 aa; 3/3<br>exons) | AGAP009342,<br>GSTU3<br>(218 aa; 2 exons) | PPAI010868<br>(221 aa; 4 exons) | FBgn0038029, GstD11<br>(222/243 aa; 3/3 exons) |
| LLOJ010531_a <sup>12</sup><br>(>115 aa; >2 exons; partial -<br>C-terminal end missing) | GSTX | AAEL010500,<br>GSTX2<br>(218/192 aa; 3/3<br>exons) | AGAP009342,<br>GSTU3<br>(218 aa; 2 exons) | PPAI010868<br>(221 aa; 4 exons) | FBgn0038029, GstD11<br>(222/243 aa; 3/3 exons) |
| LLOJ010531_b <sup>12</sup>                                                             | GSTX | AAEL010500,                                        | AGAP009342,                               | PPAI010868                      | FBgn0038029, GstD11                            |

|                                                       |            |                                                                 |                                                             |                                  |                                                     |
|-------------------------------------------------------|------------|-----------------------------------------------------------------|-------------------------------------------------------------|----------------------------------|-----------------------------------------------------|
| (>115 aa; >2 exons; partial - C-terminal end missing) |            | GSTX2<br>(218/192 aa; 3/3 exons)                                | GSTU3<br>(218 aa; 2 exons)                                  | (221 aa; 4 exons)                | (222/243 aa; 3/3 exons)                             |
| LLOJ010963<br>(221 aa; 3 exons)                       | GSTX       | AAEL010500,<br>GSTX2<br>(218/192 aa; 3/3 exons)                 | AGAP009342,<br>GSTU3<br>(218 aa; 2 exons)                   | PPAI010869<br>(221 aa; 3 exons)  | FBgn0010044, GstD8<br>(212 aa; 1 exon)              |
| LLOJ000305_a <sup>13</sup><br>(216/219 aa; 4/5 exons) | GSTZ       | AAEL011934,<br>GSTZ1<br>(233/219 aa; 3/4 exons)                 | AGAP002898,<br>GSTZ1<br>(222/263/219/219 aa; 3/5/4/4 exons) | PPAI000943<br>(141 aa; 2 exons)  | FBgn0037697, GstZ2<br>(220/215/227 aa; 4/4/3 exons) |
| LLOJ002060<br>(151 aa; 3 exons)                       | Microsomal | AAEL006829<br>(149 aa; 3 exons)                                 | AGAP000165,<br>GSTMS1<br>(151 aa; 2 exons)                  | PPAI007443<br>(504 aa; 10 exons) | FBgn0025814, Mgstl<br>(151/151/152 aa; 2/2/2 exons) |
| LLOJ010490<br>(151 aa; 3 exons)                       | Microsomal | AAEL006829<br>(149 aa; 3 exons)                                 | AGAP000165,<br>GSTMS1<br>(151 aa; 2 exons)                  | PPAI007443<br>(504 aa; 10 exons) | FBgn0025814, Mgstl<br>(151/151/152 aa; 2/2/2 exons) |
| LLOJ008423_a <sup>14</sup><br>(>107 aa; >2 exons)     | Microsomal | AAEL006829<br>(149 aa; 3 exons)                                 | AGAP000163,<br>GSTMS2<br>(152/153 aa; 3/3 exons)            | PPAI007443<br>(504 aa; 10 exons) | FBgn0025814, Mgstl<br>(151/151/152 aa; 2/2/2 exons) |
| LLOJ004345_a <sup>15</sup><br>(153 aa; 2 exons)       | Microsomal | AAEL023181, (148 aa; 2 exons) /<br>AAEL010157 (148 aa; 2 exons) | AGAP000165,<br>GSTMS1<br>(151 aa; 2 exons)                  | PPAI007443<br>(504 aa; 10 exons) | FBgn0025814, Mgstl<br>(151/151/152 aa; 2/2/2 exons) |

<sup>1</sup> Modified from original gene LLOJ004461 (1034 aa; 12 exons)

<sup>2</sup> Modified from original gene LLOJ004460 (195 aa; 3 exons)

<sup>3</sup> Modified from original gene LLOJ002711 (339 aa; 4 exons)

<sup>4</sup> Modified from original gene LLOJ009136 (268 aa; 4 exons)

<sup>5</sup> Modified from original gene LLOJ009036 (64 aa; 2 exons)

<sup>6</sup> Modified from original gene LLOJ008830 (786 aa; 9 exons)

<sup>7</sup> Modified from original gene LLOJ002682 (446 aa; 6 exons)

<sup>8</sup> Modified from original gene LLOJ001842 (1202 aa; 24 exons)

<sup>9</sup> Modified from original gene LLOJ009528 (277 aa; 4 exons)

<sup>10</sup> LLOJ010535\_a and LLOJ010534 both partial isoforms (lacking shared exon 1) of a single gene, paralogous to LLOJ010538

<sup>11</sup> Modified from original gene LLOJ010533 (207 aa; 4 exons)

<sup>12</sup> Modified from original gene LLOJ010531 (99 aa; 2 exons)

<sup>13</sup> Modified from original gene LLOJ000305 (219 aa; 5 exons)

<sup>14</sup> Modified from original gene LLOJ008423 (98 aa; 2 exons)

<sup>15</sup> Modified from original gene LLOJ004345 (102 aa; 2 exons)
